# Supplementary material for: Visible-light-induced transition metal and photosensitizer free decarbonylative addition of amino-arylaldehydes to ketones
Source: Royal Society of Chemistry journal article supplement (doi:10.1039/d1sc06278f), 2021-12-21

# Visible-Light-Induced Transition-Metal and Photosensitizer Free Decarbonylative Addition of Amino-Arylaldehydes to Ketones

Yi Wang,<sup>†</sup> Yatao Lang,<sup>†</sup> Chao-Jun Li<sup>‡</sup> and Huiying Zeng,<sup>\*,†</sup>

<sup>†</sup>The State Key Laboratory of Applied Organic Chemistry, and College of Chemistry and Chemical Engineering, Lanzhou University, 222 Tianshui Road, Lanzhou, 730000, P. R. China

<sup>‡</sup>Department of Chemistry and FQRNT Centre for Green Chemistry and Catalysis, McGill University, 801 Sherbrooke Street West, Montreal, Quebec H3A 0B8, Canada

\*Corresponding Authors: [zenghy@lzu.edu.cn](mailto:zenghy@lzu.edu.cn)

## Table of Contents

|                                                                  |     |
|------------------------------------------------------------------|-----|
| 1. General information.....                                      | S2  |
| 2. Optimizing reaction conditions.....                           | S2  |
| 3. General procedures for preparation of starting materials..... | S5  |
| 4. General procedures for decarbonylative cross-coupling.....    | S14 |
| 5. GC-MS data for CO gas.....                                    | S34 |
| 6. Emission spectra of blue LED.....                             | S34 |
| 7. UV-vis absorption spectra.....                                | S35 |
| 8. Stern-Volmer quenching studies with ketone 2b .....           | S35 |
| 9. Kinetic isotope experiments.....                              | S37 |
| 10. Computational detail.....                                    | S37 |
| 11. Notes and references.....                                    | S54 |

## 1. General information

All reagents and solvents were purchased from commercial sources and used without further purification unless otherwise stated. All reactions were monitored by thin-layer chromatography (TLC). All reactions were carried out in argon atmosphere unless otherwise stated. Column chromatography was performed on silica gel (200-300 mesh) and visualized with ultraviolet light. Ethyl acetate and petroleum ether were used as eluents.  $^1\text{H}$ ,  $^{13}\text{C}$  and  $^{19}\text{F}$  NMR spectra were recorded at room temperature on Varian Mercury plus 300, Bruker AV400 and Agilent INOVA 600 MHz with TMS as an internal standard and  $\text{CDCl}_3$  or  $\text{CD}_3\text{OD}$  as solvent. Fourier transform infrared spectra (FT-IR) were recorded on Agilent Technologies Cary 630 instrument or Bruker TENSOR 27 instrument. HRMS analyses were made by Lanzhou University by means of ESI. Melting points were measured on SGWX-4 micro melting point apparatus and uncorrected.

## 2. Optimizing reaction conditions

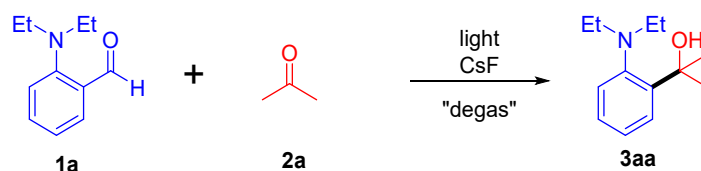

(1) Effects of base on yields<sup>a</sup>

| Entry | Base                     | Yield <sup>b</sup> /% |
|-------|--------------------------|-----------------------|
| 1     | -                        | 70                    |
| 2     | $\text{K}_2\text{CO}_3$  | 67                    |
| 3     | $\text{NaOH}$            | n.p.                  |
| 4     | $\text{Cs}_2\text{CO}_3$ | 75                    |
| 5     | $\text{CsF}$             | 88                    |
| 6     | DIPEA                    | 70                    |
| 7     | Pyridine                 | 70                    |
| 8     | DMAP                     | 85                    |

<sup>a</sup>General conditions: **1a** (0.1 mmol) and base (1.0 equiv.) in acetone (1.0 mL) were irradiated by 405 nm light for 24 h under argon atmosphere. <sup>b</sup>Yields were determined by  $^1\text{H}$  NMR using nitromethane as an internal standard.

(2) Effects of Cs<sup>+</sup> sources on yields<sup>a</sup>

| Entry | [Cs <sup>+</sup> ] | Yield <sup>b</sup> /% |
|-------|--------------------|-----------------------|
| 1     | CsBr               | 76                    |
| 2     | CsI                | 80                    |
| 3     | CsAc               | 50                    |
| 4     | CsF                | 88                    |

<sup>a</sup>General conditions: **1a** (0.1 mmol) and [Cs<sup>+</sup>] (1.0 equiv.) in acetone (1.0 mL) were irradiated by 405 nm light for 24 h under argon atmosphere. <sup>b</sup>Yields were determined by <sup>1</sup>H NMR using nitromethane as an internal standard.

(3) Effects of F<sup>-</sup> sources on yields<sup>a</sup>

| Entry | [F <sup>-</sup> ] | Yield <sup>b</sup> /% |
|-------|-------------------|-----------------------|
| 1     | LiF               | 68                    |
| 2     | KF                | 76                    |
| 3     | ZnF <sub>2</sub>  | 67                    |
| 4     | CsF               | 88                    |

<sup>a</sup>General conditions: **1a** (0.1 mmol) and [F<sup>-</sup>] (1.0 equiv.) in acetone (1.0 mL) were irradiated by 405 nm light for 24 h under argon atmosphere. <sup>b</sup>Yields were determined by <sup>1</sup>H NMR using nitromethane as an internal standard.

(4) The effects of the amount of CsF on yields<sup>a</sup>

| Entry | Conditions | Yield <sup>b</sup> /% |
|-------|------------|-----------------------|
| 1     | 0.5 equiv. | 88                    |
| 2     | 1.0 equiv. | 88                    |
| 3     | 2.0 equiv. | 86                    |

<sup>a</sup>General conditions: **1a** (0.1 mmol) and CsF (X equiv.) in acetone (1.0 mL) were irradiated by 405 nm light for 24 h under argon atmosphere. <sup>b</sup>Yields were determined by <sup>1</sup>H NMR using nitromethane as an internal standard.

(5) Effects of light on yields<sup>a</sup>

| Entry | Light  | Yield <sup>b</sup> /% |
|-------|--------|-----------------------|
| 1     | 380 nm | 83                    |
| 2     | 425 nm | 41                    |
| 3     | 465 nm | 40                    |
| 4     | dark   | n. r.                 |

<sup>a</sup>General conditions: **1a** (0.1 mmol) and CsF (0.5 equiv.) in acetone (1.0 mL) were irradiated by light for 24 h under argon atmosphere. <sup>b</sup>Yields were determined by <sup>1</sup>H NMR using nitromethane as an internal standard.

(6) Effects of reaction time on yields<sup>a</sup>

| Entry    | Time        | Yield <sup>b</sup> /% |
|----------|-------------|-----------------------|
| 1        | 4 h         | 65                    |
| 2        | 8 h         | 78                    |
| <b>3</b> | <b>12 h</b> | <b>89 (83)</b>        |

<sup>a</sup>General conditions: **1a** (0.1 mmol) and CsF (0.5 equiv.) in acetone (1.0 mL) were irradiated by 405 nm light under argon atmosphere. <sup>b</sup>Yields were determined by <sup>1</sup>H NMR using nitromethane as an internal standard; isolated yields were shown in parentheses.

Evaluation of various conditions with 3-pentanone.

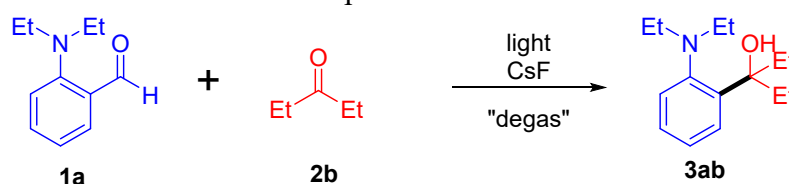

(1) Effects of solvent on yields<sup>a</sup>

| Entry | Solvent            | Yield <sup>b</sup> /% |
|-------|--------------------|-----------------------|
| 1     | cyclohexane        | 56                    |
| 2     | THF                | 61                    |
| 3     | toluene            | 73                    |
| 4     | 1,4-dioxane        | 47                    |
| 5     | HFIP               | n.r.                  |
| 6     | Acetonitrile       | n.p.                  |
| 7     | CH <sub>3</sub> OH | n.r.                  |

<sup>a</sup>General conditions: **1a** (0.1 mmol), **2b** (5.0 equiv.), CsF (0.5 equiv.) and solvent (1 mL) for 12 h under argon atmosphere, light (405 nm). <sup>b</sup>Yields were determined by <sup>1</sup>H NMR using nitromethane as an internal standard.

(2) Effects of **2b** amount on yields<sup>a</sup>

| Entry    | <b>2b</b>         | Yield <sup>b</sup> /% |
|----------|-------------------|-----------------------|
| 1        | 2.0 equiv.        | 53                    |
| 2        | 5.0 equiv.        | 73                    |
| <b>3</b> | <b>8.0 equiv.</b> | <b>87 (77)</b>        |
| 3        | 10.0 equiv.       | 82                    |

<sup>a</sup>General conditions: **1a** (0.1 mmol), **2b**, CsF (0.5 equiv.) and toluene (1 mL) for 12 h under argon atmosphere, light (405 nm). <sup>b</sup>Yields were determined by <sup>1</sup>H NMR using nitromethane as an internal standard.

### 3. General procedures for preparation of starting materials

#### i. General procedures for preparation of starting materials **1a~1h**, **1l** and **1o**

The synthesis of starting materials **1a~1h**, **1l** and **1o** were following the general procedure.<sup>1</sup> 2-Fluorobenzaldehyde (1.24 g, 10 mmol), secondary amine (12 mmol), potassium carbonate (1.66 g, 12 mmol) and DMF (10 mL) were added to a 25 mL round-bottom flask and charged with a magnetic stir bar. The reaction mixture was stirred in an oil bath and the bath temperature was slowly increased to the reflux temperature of DMF (ca. 153 °C) and stirred for 24 h. The reaction was monitored by thin-layer chromatography (TLC). After the reaction was completed, the mixture was cooled to room temperature and extracted with ethyl acetate (3 × 20 mL). The combined organic extracts were washed with brine, dried over anhydrous Na<sub>2</sub>SO<sub>4</sub>, concentrated, and further purified by column chromatography on silica gel (petroleum ether: ethyl acetate = 80: 1, v/v) to afford the corresponding products.

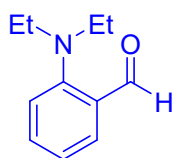

#### 2-(diethylamino)benzaldehyde (**1a**)

Yellow oil, 88%

<sup>1</sup>H NMR (600 MHz, CDCl<sub>3</sub>) δ 10.36 (s, 1H), 7.81 (dd, *J* = 7.7, 1.7 Hz, 1H), 7.51 – 7.46 (m, 1H), 7.16 (d, *J* = 8.2 Hz, 1H), 7.11 – 7.07 (m, 1H), 3.19 (q, *J* = 7.1 Hz, 4H), 1.07 (t, *J* = 7.1 Hz, 6H).

<sup>13</sup>C NMR (101 MHz, CDCl<sub>3</sub>) δ 192.2, 154.6, 134.3, 130.8, 128.9, 122.3, 121.7, 48.9,

12.4. The spectra data were consistent with the literature.<sup>1</sup>

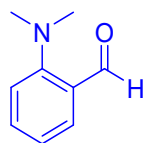

### 2-(dimethylamino)benzaldehyde (1b)

Yellow oil, 82%

<sup>1</sup>H NMR (400 MHz, CDCl<sub>3</sub>) δ 10.23 (s, 1H), 7.76 (dd, *J* = 7.7, 1.8 Hz, 1H), 7.49 – 7.43 (m, 1H), 7.07 – 6.96 (m, 2H), 2.92 (s, 6H).

<sup>13</sup>C NMR (101 MHz, CDCl<sub>3</sub>) δ 191.2, 155.8, 134.6, 131.0, 127.0, 120.6, 117.6, 45.6.

The spectra data were consistent with the literature.<sup>2</sup>

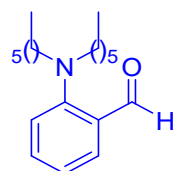

### 2-(dihexylamino)benzaldehyde (1c)

Yellow oil, 84%

IR (KBr): 2956, 2929, 2857, 2732, 1688, 1596, 1481, 1454, 1376, 1287, 1189, 1161, 1092, 831, 766, 731, 643, 456 cm<sup>-1</sup>.

<sup>1</sup>H NMR (600 MHz, CDCl<sub>3</sub>) δ 10.32 (s, 1H), 7.80 (dd, *J* = 7.7, 1.5 Hz, 1H), 7.50 – 7.46 (m, 1H), 7.15 (d, *J* = 8.2 Hz, 1H), 7.06 (t, *J* = 7.4 Hz, 1H), 3.15 – 3.09 (m, 4H), 1.47 (q, *J* = 7.4, 6.9 Hz, 4H), 1.28 – 1.17 (m, 12H), 0.85 (t, *J* = 6.9 Hz, 6H).

<sup>13</sup>C NMR (151 MHz, CDCl<sub>3</sub>) δ 192.1, 155.3, 134.2, 130.2, 128.9, 121.9, 121.4, 55.2, 31.6, 27.1, 26.8, 22.6, 14.0.

HRMS (ESI): calcd. for C<sub>19</sub>H<sub>31</sub>NO ([M+H]<sup>+</sup>): 304.2635, found: 304.2633.

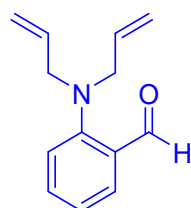

### 2-(diallylamino)benzaldehyde (1d)

Yellow oil, 60%

**<sup>1</sup>H NMR** (600 MHz, CDCl<sub>3</sub>) δ 10.35 (s, 1H), 7.80 (d, *J* = 7.7 Hz, 1H), 7.47 (t, *J* = 7.3 Hz, 1H), 7.12 – 7.04 (m, 2H), 5.82 (td, *J* = 10.3, 5.1 Hz, 2H), 5.23 (s, 1H), 5.21 – 5.16 (m, 3H), 3.79 (d, *J* = 5.9 Hz, 4H).

**<sup>13</sup>C NMR** (101 MHz, CDCl<sub>3</sub>) δ 191.7, 154.2, 134.2, 133.9, 129.5, 129.3, 122.1, 121.3, 118.1, 57.3. The spectra data were consistent with the literature.<sup>1</sup>

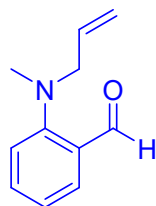

### 2-(allyl(methyl)amino)benzaldehyde (1e)

Yellow oil, 65%

**IR (KBr):** 3069, 2920, 2852, 1684, 1597, 1484, 1453, 1281, 1140, 924, 831, 761 cm<sup>-1</sup>.

**<sup>1</sup>H NMR** (400 MHz, CDCl<sub>3</sub>) δ 10.26 (s, 1H), 7.79 (dd, *J* = 7.7, 1.8 Hz, 1H), 7.48 (ddd, *J* = 8.3, 7.2, 1.8 Hz, 1H), 7.09 (d, *J* = 8.3 Hz, 1H), 7.03 (t, *J* = 7.5 Hz, 1H), 5.92 (ddt, *J* = 17.2, 10.2, 5.9 Hz, 1H), 5.38 – 5.16 (m, 2H), 3.74 (d, *J* = 5.9 Hz, 2H), 2.86 (s, 3H).

**<sup>13</sup>C NMR** (101 MHz, CDCl<sub>3</sub>) δ 191.3, 155.5, 134.5, 134.0, 130.2, 127.7, 121.2, 118.8, 117.9, 62.0, 41.0.

**HRMS (ESI):** calcd. for C<sub>11</sub>H<sub>13</sub>NO ([M+H]<sup>+</sup>): 176.1070, found: 176.1070.

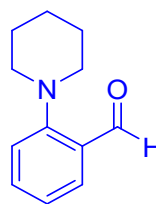

### 2-(piperidin-1-yl)benzaldehyde (1f)

Yellow oil, 86%

**<sup>1</sup>H NMR** (600 MHz, CDCl<sub>3</sub>) δ 10.30 (d, *J* = 0.7 Hz, 1H), 7.80 (dd, *J* = 7.7, 1.7 Hz, 1H), 7.50 (ddd, *J* = 8.3, 7.3, 1.8 Hz, 1H), 7.15 – 7.03 (m, 2H), 3.11 – 2.99 (m, 4H), 1.77 (p, *J* = 5.9 Hz, 4H), 1.64 – 1.57 (m, 2H).

**<sup>13</sup>C NMR** (101 MHz, CDCl<sub>3</sub>) δ 191.7, 157.0, 134.8, 129.2, 128.6, 122.0, 119.0, 55.6, 26.2, 24.1. The spectra data were consistent with the literature.<sup>1</sup>

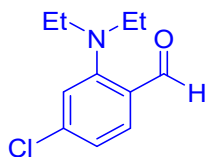

**4-chloro-2-(diethylamino)benzaldehyde (1g)**

Yellow oil, 86%

**IR (KBr):** 2974, 2934, 2844, 2736, 1690, 1587, 1468, 1411, 1381, 1242, 1189, 1173, 1086, 1011, 919, 838, 811  $\text{cm}^{-1}$ .

**$^1\text{H}$  NMR** (300 MHz,  $\text{CDCl}_3$ )  $\delta$  10.22 (s, 1H), 7.74 (d,  $J = 8.3$  Hz, 1H), 7.10 (d,  $J = 1.8$  Hz, 1H), 7.04 (dd,  $J = 8.3, 1.2$  Hz, 1H), 3.21 (q,  $J = 7.1$  Hz, 4H), 1.09 (t,  $J = 7.1$  Hz, 6H).

**$^{13}\text{C}$  NMR** (101 MHz,  $\text{CDCl}_3$ )  $\delta$  190.7, 155.3, 140.5, 130.5, 128.4, 122.4, 121.5, 48.7, 12.2.

**HRMS (ESI):** calcd. for  $\text{C}_{11}\text{H}_{14}\text{ClNO}$  ( $[\text{M}+\text{H}]^+$ ): 212.0836, found: 212.0840.

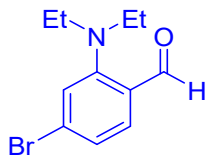

**4-bromo-2-(diethylamino)benzaldehyde (1h)**

Yellow oil, 86%

**IR (KBr):** 2973, 2933, 2844, 1689, 1581, 1467, 1409, 1362, 1241, 1190, 1173, 1146, 1083, 1009, 912, 834, 809, 663, 592  $\text{cm}^{-1}$ .

**$^1\text{H}$  NMR** (600 MHz,  $\text{CDCl}_3$ )  $\delta$  10.23 (s, 1H), 7.66 (d,  $J = 8.3$  Hz, 1H), 7.27 (d,  $J = 1.6$  Hz, 1H), 7.20 (d,  $J = 8.3$  Hz, 1H), 3.20 (q,  $J = 7.1$  Hz, 4H), 1.09 (t,  $J = 7.1$  Hz, 6H).

**$^{13}\text{C}$  NMR** (101 MHz,  $\text{CDCl}_3$ )  $\delta$  190.8, 155.2, 130.5, 129.3, 128.8, 125.3, 124.5, 48.7, 12.3.

**HRMS (ESI):** calcd. for  $\text{C}_{11}\text{H}_{14}\text{BrNO}$  ( $[\text{M}+\text{H}]^+$ ): 256.0332, found: 256.0337.

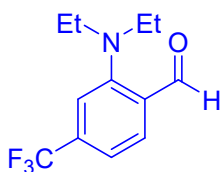

**2-(diethylamino)-4-(trifluoromethyl)benzaldehyde (1l)**

Yellow oil, 86%

**IR (KBr):** 2977, 2936, 2875, 2850, 1694, 1613, 1576, 1494, 1427, 1382, 1318, 1241,



1170, 1130, 1074, 1015, 940, 882, 845, 830, 778, 731, 667  $\text{cm}^{-1}$ .

$^1\text{H NMR}$  (600 MHz,  $\text{CDCl}_3$ )  $\delta$  10.30 (s, 1H), 7.88 (d,  $J = 8.0$  Hz, 1H), 7.35 (s, 1H), 7.29 (d,  $J = 7.9$  Hz, 1H), 3.25 (q,  $J = 7.0$  Hz, 4H), 1.11 (t,  $J = 7.0$  Hz, 6H).

$^{13}\text{C NMR}$  (101 MHz,  $\text{CDCl}_3$ )  $\delta$  190.9, 154.4, 135.4 (q,  $J = 32.2$  Hz), 132.3, 129.9, 123.6 (d,  $J = 273.2$  Hz), 118.3 (q,  $J = 3.7$  Hz), 118.1 (q,  $J = 3.7$  Hz), 48.7, 12.3.

$^{19}\text{F NMR}$  (282 MHz,  $\text{CDCl}_3$ )  $\delta$  -64.2.

**HRMS (ESI):** calcd. for  $\text{C}_{12}\text{H}_{14}\text{F}_3\text{NO}$  ( $[\text{M}+\text{H}]^+$ ): 246.1100, found: 246.1099.

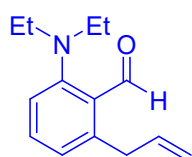

### 2-allyl-6-(diethylamino)benzaldehyde (1m)

Yellow oil, 88%

**IR (KBr):** 3077, 2974, 2933, 2871, 2838, 1686, 1639, 1585, 1466, 1443, 1382, 1250, 1173, 1086, 1066, 1032, 996, 912, 856, 795, 739, 667  $\text{cm}^{-1}$ .

$^1\text{H NMR}$  (600 MHz,  $\text{CDCl}_3$ )  $\delta$  10.35 (s, 1H), 7.40 (t,  $J = 7.8$  Hz, 1H), 7.07 (d,  $J = 8.1$  Hz, 1H), 6.94 (d,  $J = 7.5$  Hz, 1H), 6.01 (dt,  $J = 16.8, 8.4$  Hz, 1H), 5.11 – 4.95 (m, 2H), 3.84 – 3.64 (m, 2H), 3.14 (q,  $J = 7.0$  Hz, 4H), 1.04 (t,  $J = 7.0$  Hz, 6H).

$^{13}\text{C NMR}$  (151 MHz,  $\text{CDCl}_3$ )  $\delta$  194.4, 155.5, 142.3, 137.6, 132.8, 129.8, 124.7, 119.9, 115.4, 48.9, 37.6, 12.3.

**HRMS (ESI):** calcd. for  $\text{C}_{14}\text{H}_{19}\text{NO}$  ( $[\text{M}+\text{H}]^+$ ): 218.1538, found: 218.1539.

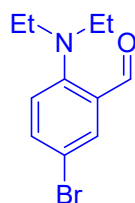

### 5-bromo-2-(diethylamino)benzaldehyde (1n)

Yellow oil

$^1\text{H NMR}$  (400 MHz,  $\text{CDCl}_3$ )  $\delta$  10.3 (s, 1H), 7.9 (d,  $J = 2.5$  Hz, 1H), 7.6 (dd,  $J = 8.7, 2.6$  Hz, 1H), 7.0 (d,  $J = 8.7$  Hz, 1H), 3.2 (q,  $J = 7.1$  Hz, 4H), 1.1 (t,  $J = 7.1$  Hz, 6H).

$^{13}\text{C NMR}$  (101 MHz,  $\text{CDCl}_3$ )  $\delta$  190.5, 153.4, 136.8, 132.0, 131.6, 123.6, 115.5, 48.9, 12.3.

**HRMS (ESI):** calcd. for  $\text{C}_{11}\text{H}_{14}\text{BrNO}$  ( $[\text{M}+\text{H}]^+$ ): 256.0332 found: 256.0329.

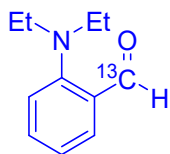

**(<sup>13</sup>C)-2-(diethylamino)benzaldehyde (1a')**

Yellow oil

**IR (KBr):** 3730, 2973, 2931, 2850, 2322, 1652, 1594, 1483, 1452, 1378, 1274, 1242, 1187, 1144, 1093, 819, 764, 638, 419 cm<sup>-1</sup>.

**<sup>1</sup>H NMR** (600 MHz, CDCl<sub>3</sub>) δ 10.36 (d, *J* = 179.2 Hz, 1H), 7.81 (dd, *J* = 8.0, 4.1 Hz, 1H), 7.49 (t, *J* = 7.8 Hz, 1H), 7.16 (d, *J* = 8.2 Hz, 1H), 7.09 (t, *J* = 7.5 Hz, 1H), 3.19 (q, *J* = 7.1 Hz, 4H), 1.07 (t, *J* = 7.1 Hz, 6H).

**<sup>13</sup>C NMR** (101 MHz, CDCl<sub>3</sub>) δ 192.2, 154.6 (d, *J* = 2.6 Hz), 137.2 (d, *J* = 2.9 Hz), 134.3, 130.8 (d, *J* = 54.2 Hz), 128.9 (d, *J* = 1.7 Hz), 122.0 (dd, *J* = 65.0, 3.2 Hz), 49.0, 12.4.

**HRMS (ESI):** calcd. for C<sub>10</sub><sup>13</sup>CH<sub>16</sub>NO ([M+H]<sup>+</sup>): 179.1260, found: 179.1265.

**ii. Preparation of starting materials 1k**

The compound **1k** was prepared following the literature procedure.<sup>3</sup> **1h** (25.6 mg, 1.0 mmol), Cs<sub>2</sub>CO<sub>3</sub> (977 mg, 3.0 mmol) and Pd(dppf)Cl<sub>2</sub> (15 mg, 2 mol%) were added to a 25 mL Schlenk tube, and the mixture was dissolved in THF (2.0 mL). Triethylborane (3.0 mL, 1 M solution in THF, 3.0 mmol) was then added, and the mixture was refluxed for 6 h. The reaction mixture was cooled to 0 °C and quenched by 10% aq NaOH and 30% aq H<sub>2</sub>O<sub>2</sub>, and further stirring for 30 min at rt. The mixture was acidified by dilute aq HCl, and extracted with ether (3×10 mL). The combined organic extracts were dried over anhydrous Na<sub>2</sub>SO<sub>4</sub>, concentrated, and purified by column chromatography on silica gel (petroleum ether: ethyl acetate = 80: 1, v/v) to afford the products **1k**.

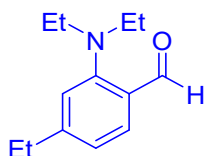

**2-(diethylamino)-4-ethylbenzaldehyde (1k)**

Yellow oil, 86%

**IR (KBr):** 3737, 2970, 2933, 2871.8, 2843, 2310, 1681, 1601, 1567, 1546, 1511,

1491, 1455, 1423, 1378, 1278, 1247, 1202, 1100, 1013, 934, 849, 828, 751, 419  $\text{cm}^{-1}$ .  
 $^1\text{H NMR}$  (600 MHz,  $\text{CDCl}_3$ )  $\delta$  10.31 (s, 1H), 7.74 (d,  $J = 7.9$  Hz, 1H), 6.96 (s, 1H), 6.93 (d,  $J = 7.9$  Hz, 1H), 3.18 (q,  $J = 7.1$  Hz, 4H), 2.66 (q,  $J = 7.6$  Hz, 2H), 1.25 (t,  $J = 7.6$  Hz, 3H), 1.06 (t,  $J = 7.1$  Hz, 6H).  
 $^{13}\text{C NMR}$  (101 MHz,  $\text{CDCl}_3$ )  $\delta$  191.8, 154.9, 151.5, 129.1, 128.7, 122.3, 121.0, 48.9, 29.4, 15.2, 12.4.

**HRMS (ESI):** calcd. for  $\text{C}_{13}\text{H}_{19}\text{NO}$  ( $[\text{M}+\text{H}]^+$ ): 206.1539, found: 206.1540.

### iii. Preparation of starting materials **1i**

The compound **1i** was prepared following the literature procedure.<sup>4</sup>  $\text{CuI}$  (19 mg, 5 mol %), 8-hydroxyquinoline (29 mg, 10 mol %) and  $\text{K}_3\text{PO}_4$  (425mg, 2.0mmol) were added to a 25 mL round-bottom flask, and the flask was evacuated and backfilled with argon (3 cycles). **1h** (256 mg, 1.0 mmol) and ethanol (1 mL) were added by syringe at room temperature. The oil bath temperature was slowly increased to 110  $^\circ\text{C}$  and stirred for 24 h. The reaction was monitored by TLC. After the reaction was completed, the organic layer was extracted with ethyl acetate ( $3 \times 20$  mL) and dried over anhydrous  $\text{Na}_2\text{SO}_4$ . The combined organic layers were concentrated under vacuo and purified by column chromatography on silica gel (petroleum ether: ethyl acetate = 80: 1) to afford the product **1i**.

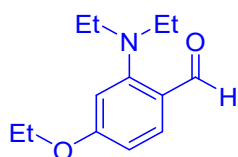

### 2-(diethylamino)-4-ethoxybenzaldehyde (**1i**)

Yellow oil, 60%

**IR (KBr):** 2976, 2933, 2872, 2838, 1677, 1595, 1491, 1476, 1383, 1301, 1287, 1254, 1212, 1100, 1043, 851, 805  $\text{cm}^{-1}$ .

$^1\text{H NMR}$  (600 MHz,  $\text{CDCl}_3$ )  $\delta$  10.18 (s, 1H), 7.79 (d,  $J = 8.4$  Hz, 1H), 6.60 (d,  $J = 8.5$  Hz, 2H), 4.09 (d,  $J = 7.0$  Hz, 2H), 3.18 (q,  $J = 7.1$  Hz, 4H), 1.44 (t,  $J = 7.0$  Hz, 3H), 1.07 (t,  $J = 7.1$  Hz, 6H).

$^{13}\text{C NMR}$  (101 MHz,  $\text{CDCl}_3$ )  $\delta$  190.6, 164.2, 156.7, 131.4, 124.3, 108.3, 107.4, 63.7, 48.7, 14.7, 12.3.

**HRMS (ESI):** calcd. for  $\text{C}_{13}\text{H}_{19}\text{NO}_2$  ( $[\text{M}+\text{H}]^+$ ): 222.1489, found: 222.1489.

#### iv. Preparation of starting materials **1j**

The compound **1j** was prepared following the literature procedure.<sup>5</sup> Pd<sub>2</sub>(dba)<sub>3</sub> (9.2 mg, 0.01 mmol), DPPF (11.1 mg, 0.02 mmol) and toluene (1.0 mL) were added to a 25 mL round-bottom flask. **1h** (256 mg, 1.0 mmol), *i*-Pr<sub>2</sub>NEt (0.19 mL, 1.1 mmol) and ethanol (0.5 mL) were added at room temperature. The bath temperature was slowly increased to 110 °C and stirred for 24 h. The reaction was monitored by TLC. After the reaction was completed, the mixture was extracted with ethyl acetate (3 × 20 mL) and dried over anhydrous Na<sub>2</sub>SO<sub>4</sub>. The combined organic layers were concentrated under vacuo and purified by column chromatography on silica gel (petroleum ether: ethyl acetate = 80: 1, v/v) to afford the product **1j**.

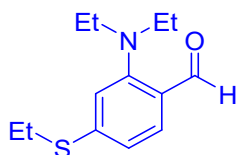

#### 2-(diethylamino)-4-(ethylthio)benzaldehyde (**1j**)

Yellow oil, 70%

**IR (KBr):** 3730, 2972, 2930, 2871, 2841, 1672, 1582, 1551, 1473, 1453, 1405, 1379, 1364, 1291, 1263, 1239, 1150, 1076, 840, 811, 419 cm<sup>-1</sup>.

**<sup>1</sup>H NMR** (600 MHz, CDCl<sub>3</sub>) δ 10.23 (s, 1H), 7.72 (d, *J* = 8.2 Hz, 1H), 6.99 – 6.92 (m, 2H), 3.19 (q, *J* = 7.1 Hz, 4H), 3.01 (q, *J* = 7.4 Hz, 2H), 1.37 (t, *J* = 7.4 Hz, 3H), 1.07 (t, *J* = 7.1 Hz, 6H).

**<sup>13</sup>C NMR** (101 MHz, CDCl<sub>3</sub>) δ 191.0, 154.6, 146.0, 129.5, 127.5, 120.0, 119.1, 48.7, 26.0, 14.0, 12.3.

**HRMS (ESI):** calcd. for C<sub>13</sub>H<sub>19</sub>NOS ([M+H]<sup>+</sup>): 238.1260, found: 238.1260.

#### v. Preparation of starting materials **1b'**

To a 25 mL round-bottom flask, NaH (ca. 60% dispersion in mineral oil, 3.0 mmol) was added and the flask was evacuated and backfilled with argon. 2-aminobenzaldehyde (121 mg, 1 mmol) was added to the flask, and the mixture was cooled to 0 °C by ice/water bath. Iodomethane-D<sub>3</sub> (187 μL, 3.0 mmol) was added slowly to the flask. The ice/water bath was removed, and the mixture was stirred overnight at room temperature. The reaction was monitored by TLC. After the reaction was completed, the organic layer was extracted with ethyl acetate (3 × 20 mL) and dried over anhydrous Na<sub>2</sub>SO<sub>4</sub>. The combined organic layers were concentrated

---

under vacuo and purified by column chromatography on silica gel (petroleum ether: ethyl acetate = 80: 1, v/v) to afford the products **1b'**.

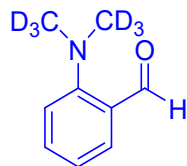

**2-(bis(methyl-d3)amino)benzaldehyde (1b')**

Yellow oil, 70%

**IR (KBr):** 2847, 2740, 2241, 2193, 2055, 1684, 1597, 1482, 1453, 1388, 1321, 1292, 1275, 1192, 1177, 1117, 1100, 843, 820, 760, 639 cm<sup>-1</sup>.

**<sup>1</sup>H NMR** (400 MHz, CDCl<sub>3</sub>) δ 10.22 (s, 1H), 7.77 (dd, *J* = 7.7, 1.8 Hz, 1H), 7.47 (ddd, *J* = 8.3, 7.2, 1.8 Hz, 1H), 7.07 – 6.97 (m, 2H).

**<sup>13</sup>C NMR** (151 MHz, CDCl<sub>3</sub>) δ 191.1, 155.7, 134.5, 131.0, 126.9, 120.5, 117.5, 44.5 (hept, *J* = 20.1).

**HRMS (ESI):** calcd. for C<sub>9</sub>H<sub>5</sub>D<sub>6</sub>NO ([M+H]<sup>+</sup>): 156.1290, found: 156.1290.

**vi. Preparation of starting materials 1a''**

LiAlD<sub>4</sub> (205 mg, 5.0 mmol) and THF (10 mL) were added to a 25 mL round-bottom flask and the mixture was cooled to 0 °C by ice/water bath. **1a** (5.0 mmol, 885.3 mg) in THF (2 mL) was slowly added to the flask. The mixture was further stirred for 2 h at room temperature. The reaction was monitored by TLC. After the reaction was completed, the reaction mixture was slowly quenched with H<sub>2</sub>O and the extracted with ethyl acetate (3×10 mL) and dried over anhydrous Na<sub>2</sub>SO<sub>4</sub>. The combined organic layers were concentrated under vacuo. The residue product was further dissolved in 40 mL CH<sub>2</sub>Cl<sub>2</sub> and MnO<sub>2</sub> (20 mmol, 1.74 g) was added. The mixture was further stirred for 48 h at room temperature. After the reaction was completed, the reaction mixture was filtered and the filtrate was concentrated under vacuo. The crude product was further purified by column chromatography on silica gel (petroleum ether: ethyl acetate = 80: 1, v/v) to afford the products **1a''**.

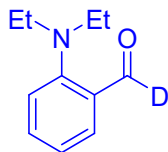

**(D)-2-(diethylamino)benzaldehyde (1a'')**

**IR (KBr):** 2974, 2927, 2851, 1667, 1595, 1482, 1451, 1381, 1355, 1291, 1274, 1243, 1209, 1175, 1147, 1105, 1023, 942, 797, 764, 413  $\text{cm}^{-1}$ .

**$^1\text{H}$  NMR** (600 MHz,  $\text{CDCl}_3$ )  $\delta$  7.82 (dd,  $J = 7.8, 1.7$  Hz, 1H), 7.50 (ddd,  $J = 8.2, 7.1, 1.8$  Hz, 1H), 7.18 – 7.09 (m, 1H), 7.08 (d,  $J = 7.7$  Hz, 1H), 3.19 (q,  $J = 7.1$  Hz, 4H), 1.07 (t,  $J = 7.1$  Hz, 6H).

**$^{13}\text{C}$  NMR** (101 MHz,  $\text{CDCl}_3$ )  $\delta$  192.0 (t,  $J = 27.4$  Hz), 154.6, 134.3, 130.5 (t,  $J = 3.1$ ), 128.9, 122.3, 121.6, 48.9, 12.3.

**HRMS (ESI):** calcd. for  $\text{C}_{11}\text{H}_{14}\text{DNO}$  ( $[\text{M}+\text{H}]^+$ ): 179.1289, found: 179.1288.

## 4. General procedures for decarbonylative cross-coupling

### i. Decarbonylative cross-coupling of aldehyde with acetone

The starting materials **1** (0.1 mmol), CsF (0.05 mmol) and acetone (1 mL) were added to a 20 mL tube with a magnetic stir-bar. Then the tube was evacuated by three freeze-pump-thaw cycles and back-filled with ultra-purified argon. The reaction mixture was stirred at room temperature under 405nm LED for 12 h and monitored by TLC. After the reaction was completed, the mixture was filtered through a pad of diatomite. The organic layers were then concentrated under vacuo and purified by column chromatography on silica gel (petroleum ether: ethyl acetate = 30: 1, v/v) to afford the products **3**.

### ii. Decarbonylative cross-coupling of aldehyde with other ketones

The starting materials **1** (0.1 mmol), CsF (0.05 mmol), ketone (0.8 mmol) and toluene (1.0 mL) were added to a 20 mL tube with a magnetic stir-bar. Then the tube was evacuated by three freeze-pump-thaw cycles and back-filled with ultra-purified argon. The reaction was stirred at room temperature under 405nm LED for 12 h. After the reaction was completed, the mixture was filtered through a pad of diatomite. The organic layers were then concentrated under vacuo and purified by column chromatography on silica gel (petroleum ether: ethyl acetate = 30: 1, v/v) to afford the products **3**.

---

## Characterization data of products

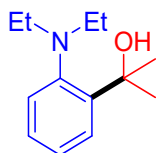

### 2-(2-(diethylamino)phenyl)propan-2-ol (3aa)

Colourless oil. 17 mg, 82%

**IR (KBr):** 3062, 2975, 2931, 2837, 1483, 1442, 1379, 1356, 1278, 1217, 1167, 1120, 1083, 1047, 964, 758, 679, 558  $\text{cm}^{-1}$ .

**$^1\text{H}$  NMR** (600 MHz,  $\text{CDCl}_3$ )  $\delta$  10.33 (br, 1H), 7.29 (d,  $J = 8.2$  Hz, 1H), 7.27 – 7.22 (m, 2H), 7.21 – 7.17 (m, 1H), 3.05 (dq,  $J = 14.2, 7.2$  Hz, 2H), 2.94 (dq,  $J = 14.1, 7.2$  Hz, 2H), 1.58 (s, 6H), 1.09 (t,  $J = 7.2$  Hz, 6H).

**$^{13}\text{C}$  NMR** (101 MHz,  $\text{CDCl}_3$ )  $\delta$  147.2, 145.4, 127.4, 127.3, 126.1, 124.1, 74.7, 50.5, 33.9, 12.9.

**HRMS (ESI):** calcd. for  $\text{C}_{13}\text{H}_{21}\text{NO}$  ( $[\text{M}+\text{H}]^+$ ): 208.1696, found: 208.1700.

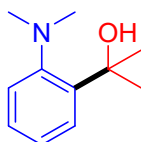

### 2-(2-(dimethylamino)phenyl)propan-2-ol (3ba)

Colourless oil. 14 mg, 78%

**IR (KBr):** 3101, 3065, 2977, 2945, 2928, 2866, 2833, 2790, 1731, 1682, 1598, 1485, 1457, 1404, 1377, 1357, 1283, 1181, 1118, 1096, 1037, 934, 758, 679, 552  $\text{cm}^{-1}$ .

**$^1\text{H}$  NMR** (600 MHz,  $\text{CDCl}_3$ )  $\delta$  9.52 (br, 1H), 7.36 (d,  $J = 8.0$  Hz, 1H), 7.29 – 7.24 (m, 2H), 7.17 (t,  $J = 7.5$  Hz, 1H), 2.71 (s, 6H), 1.58 (s, 6H).

**$^{13}\text{C}$  NMR** (101 MHz,  $\text{CDCl}_3$ )  $\delta$  151.1, 144.1, 127.7, 126.7, 126.3, 123.5, 74.0, 46.6, 32.7.

**HRMS (ESI):** calcd. for  $\text{C}_{11}\text{H}_{17}\text{NO}$  ( $[\text{M}+\text{H}]^+$ ): 180.1383, found: 180.1387.

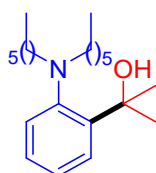

### 2-(2-(dihexylamino)phenyl)propan-2-ol (3ca)

Colourless oil. 20 mg, 63%

**IR (KBr):** 3062, 2957, 2930, 2857, 1466, 1441, 1377, 1356, 1279, 1213, 1175, 1118, 1094, 1084, 1048, 964, 757, 725, 684, 559  $\text{cm}^{-1}$ .

**$^1\text{H}$  NMR** (400 MHz,  $\text{CDCl}_3$ )  $\delta$  10.29 (br, 1H), 7.28 – 7.24 (m, 2H), 7.22 (td,  $J = 7.4$ , 1.9 Hz, 1H), 7.16 (td,  $J = 7.3$ , 1.7 Hz, 1H), 2.91 (td,  $J = 12.2$ , 10.7, 5.2 Hz, 2H), 2.82 (td,  $J = 12.2$ , 10.7, 5.2 Hz, 2H), 1.65 – 1.57 (m, 2H), 1.55 (s, 6H), 1.41 – 1.31 (m, 2H), 1.30– 1.18 (m, 12H), 0.88 – 0.81 (m, 6H).

**$^{13}\text{C}$  NMR** (101 MHz,  $\text{CDCl}_3$ )  $\delta$  148.3, 144.8, 127.4, 127.3, 125.9, 124.1, 74.6, 57.3, 33.9, 31.6, 27.6, 27.2, 22.2, 14.0.

**HRMS (ESI):** calcd. for  $\text{C}_{21}\text{H}_{37}\text{NO}$  ( $[\text{M}+\text{H}]^+$ ): 320.2948, found: 320.2950.

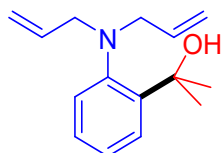

### 2-(2-(diallylamino)phenyl)propan-2-ol (3da)

Colourless oil. 11 mg, 48%

**IR (KBr):** 3078, 2977, 2927, 2848, 1735, 1687, 1644, 1597, 1575, 1483, 1442, 1421, 1377, 1357, 1278, 1174, 1084, 991, 962, 924, 757, 694, 661, 597, 550  $\text{cm}^{-1}$ .

**$^1\text{H}$  NMR** (400 MHz,  $\text{CDCl}_3$ )  $\delta$  9.56 (br, 1H), 7.29 – 7.26 (m, 1H), 7.26 – 7.14 (m, 3H), 5.90 (ddt,  $J = 17.0$ , 10.2, 6.7 Hz, 2H), 5.18 (q,  $J = 1.5$  Hz, 1H), 5.16 – 5.10 (m, 3H), 3.57 (dd,  $J = 12.1$ , 6.8 Hz, 4H), 1.57 (s, 6H).

**$^{13}\text{C}$  NMR** (101 MHz,  $\text{CDCl}_3$ )  $\delta$  147.7, 144.8, 133.9, 127.3, 127.2, 126.3, 125.1, 119.0, 74.5, 59.0, 33.4.

**HRMS (ESI):** calcd. for  $\text{C}_{15}\text{H}_{21}\text{NO}$  ( $[\text{M}+\text{H}]^+$ ): 232.1696, found: 232.1700.

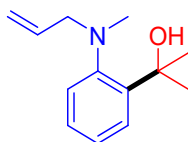

### 2-(2-(allyl(methyl)amino)phenyl)propan-2-ol (3ea)

Colourless oil. 10 mg, 49%

**IR (KBr):** 3074, 2977, 2926, 2799, 1737, 1643, 1597, 1578, 1484, 1453, 1423, 1377, 1357, 1276, 1222, 1176, 1119, 996, 960, 910, 758, 697, 552  $\text{cm}^{-1}$ .

**$^1\text{H}$  NMR** (600 MHz,  $\text{CDCl}_3$ )  $\delta$  9.43 (br, 1H), 7.30 (t,  $J = 8.4$  Hz, 2H), 7.27 – 7.23 (m,



1H), 7.18 (t,  $J = 7.6$  Hz, 1H), 5.97 – 5.87 (m, 1H), 5.23 (dd,  $J = 34.4, 13.7$  Hz, 2H), 3.59 (d,  $J = 11.7$  Hz, 1H), 3.42 (t,  $J = 10.7$  Hz, 1H), 2.67 (s, 3H), 1.58 (s, 6H).

$^{13}\text{C}$  NMR (101 MHz,  $\text{CDCl}_3$ )  $\delta$  150.4, 144.3, 134.1, 127.5, 126.8, 126.3, 124.2, 118.8, 74.1, 61.7, 43.5, 32.9, 32.7.

HRMS (ESI): calcd. for  $\text{C}_{13}\text{H}_{19}\text{NO}$  ( $[\text{M}+\text{H}]^+$ ): 206.1539, found: 206.1542.

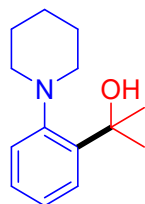

### 2-(2-(piperidin-1-yl)phenyl)propan-2-ol (3fa)

Yellow oil, 18 mg, 82%

IR (KBr): 2934, 2853, 2825, 1576, 1484, 1442, 1377, 1355, 1311, 1275, 1212, 1119, 1049, 1033, 959, 913, 863, 757, 695, 539  $\text{cm}^{-1}$ .

$^1\text{H}$  NMR (600 MHz,  $\text{CDCl}_3$ )  $\delta$  9.62 (br, 1H), 7.32 (d,  $J = 8.0$  Hz, 1H), 7.28 (d,  $J = 7.9$  Hz, 1H), 7.24 (t,  $J = 7.6$  Hz, 1H), 7.17 (d,  $J = 7.5$  Hz, 1H), 3.05 (d,  $J = 11.6$  Hz, 2H), 2.78 (td,  $J = 11.6, 3.2$  Hz, 2H), 1.85 (d,  $J = 13.7$  Hz, 1H), 1.79 – 1.67 (m, 4H), 1.58 (s, 6H), 1.39 – 1.32 (m, 1H).

$^{13}\text{C}$  NMR (101 MHz,  $\text{CDCl}_3$ )  $\delta$  150.8, 144.2, 127.5, 126.7, 126.3, 124.1, 74.0, 55.4, 32.7, 26.4, 23.8.

HRMS (ESI): calcd. for  $\text{C}_{14}\text{H}_{21}\text{NO}$  ( $[\text{M}+\text{H}]^+$ ): 220.1696, found: 220.1700.

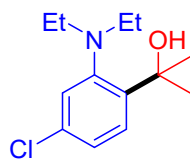

### 2-(4-chloro-2-(diethylamino)phenyl)propan-2-ol (3ga)

Yellow oil. 22 mg, 91%

IR (KBr): 3064, 2976, 2929, 2838, 1589, 1564, 1473, 1450, 1383, 1358, 1297, 1277, 1214, 1175, 1120, 1028, 965, 918, 867, 820, 804, 787, 637, 549  $\text{cm}^{-1}$ .

$^1\text{H}$  NMR (600 MHz,  $\text{CDCl}_3$ )  $\delta$  9.89 (br, 1H), 7.23 – 7.19 (m, 2H), 7.16 (d,  $J = 8.5$  Hz, 1H), 3.02 (dq,  $J = 14.3, 7.3$  Hz, 2H), 2.88 (dq,  $J = 14.0, 7.2$  Hz, 2H), 1.53 (s, 6H), 1.08 (t,  $J = 7.2$  Hz, 6H).

$^{13}\text{C}$  NMR (101 MHz,  $\text{CDCl}_3$ )  $\delta$  148.7, 144.1, 132.5, 128.6, 126.5, 124.5, 74.4, 50.7,

33.7, 12.9.

**HRMS (ESI):** calcd. for C<sub>13</sub>H<sub>20</sub>ClNO ([M+H]<sup>+</sup>): 242.1306, found: 242.1311.

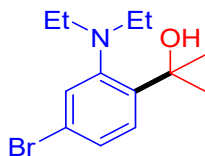

**2-(4-bromo-2-(diethylamino)phenyl)propan-2-ol (3ha)**

Yellow oil. 25 mg, 88%

**IR (KBr):** 3062, 2975, 2928, 2839, 1582, 1561, 1478, 1382, 1297, 1275, 1212, 1175, 1121, 1100, 1068, 1028, 965, 908, 866 819 780, 626 549 cm<sup>-1</sup>.

**<sup>1</sup>H NMR** (600 MHz, CDCl<sub>3</sub>) δ 9.85 (br, 1H), 7.35 (s, 1H), 7.30 (d, *J* = 8.7 Hz, 1H), 7.15 (d, *J* = 8.5 Hz, 1H), 3.02 (dq, *J* = 14.2, 7.3 Hz, 2H), 2.88 (dq, *J* = 14.0, 7.4 Hz, 2H), 1.53 (s, 6H), 1.08 (t, *J* = 7.3 Hz, 6H).

**<sup>13</sup>C NMR** (101 MHz, CDCl<sub>3</sub>) δ 148.9, 144.6, 129.4, 129.0, 127.5, 120.3, 74.4, 50.7, 33.7, 12.9.

**HRMS (ESI):** calcd. for C<sub>13</sub>H<sub>20</sub>BrNO ([M+H]<sup>+</sup>): 286.0801, found: 286.0806.

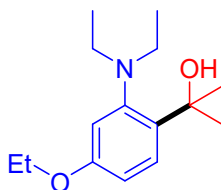

**2-(2-(diethylamino)-4-ethoxyphenyl)propan-2-ol (3ia)**

Colourless oil. 17 mg, 68%

**IR (KBr):** 3066, 2975, 2927, 2874, 2850, 1608, 1573, 1478, 1448, 1381, 1312, 1286, 1243, 1197, 1167, 1116, 1047, 963, 866, 851, 820, 672, 549 cm<sup>-1</sup>.

**<sup>1</sup>H NMR** (300 MHz, CDCl<sub>3</sub>) δ 10.05 (br, 1H), 7.17 (d, *J* = 8.3 Hz, 1H), 6.77 – 6.70 (m, 2H), 4.08 – 3.93 (m, 2H), 2.95 (dtd, *J* = 27.5, 13.3, 12.5, 7.2 Hz, 4H), 1.53 (s, 6H), 1.41 (td, *J* = 7.0, 1.1 Hz, 3H), 1.07 (td, *J* = 7.2, 1.1 Hz, 6H).

**<sup>13</sup>C NMR** (101 MHz, CDCl<sub>3</sub>) δ 157.9, 148.4, 137.7, 128.0, 112.0, 110.0, 74.2, 63.5, 50.5, 34.0, 14.8, 12.9.

**HRMS (ESI):** calcd. for C<sub>15</sub>H<sub>25</sub>NO<sub>2</sub> ([M+H]<sup>+</sup>): 252.1958, found: 252.1963.

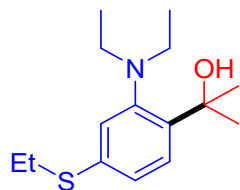

**2-(2-(diethylamino)-4-(ethylthio)phenyl)propan-2-ol (3ja)**

Colourless oil. 22 mg, 82%

**IR (KBr):** 3063, 2974, 2928, 2872, 2836, 1590, 1551, 1477, 1449, 1381, 1357, 1280, 1262, 1213, 1167, 1143, 1120, 1086, 1065, 1029, 964, 921  $\text{cm}^{-1}$ .

**$^1\text{H}$  NMR** (400 MHz,  $\text{CDCl}_3$ )  $\delta$  10.07 (br, 1H), 7.22 – 7.17 (m, 2H), 7.14 (dd,  $J = 8.4$ , 1.8 Hz, 1H), 3.08 – 2.97 (m, 2H), 2.97 – 2.86 (m, 4H), 1.54 (s, 6H), 1.31 (t,  $J = 7.4$  Hz, 3H), 1.07 (t,  $J = 7.2$  Hz, 6H).

**$^{13}\text{C}$  NMR** (101 MHz,  $\text{CDCl}_3$ )  $\delta$  147.7, 143.1, 135.2, 127.9, 126.9, 125.1, 74.5, 50.5, 33.8, 27.8, 14.4, 12.9.

**HRMS (ESI):** calcd. for  $\text{C}_{15}\text{H}_{25}\text{NOS}$  ( $[\text{M}+\text{H}]^+$ ): 268.1730, found: 268.1734.

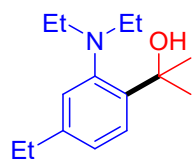

**2-(2-(diethylamino)-4-ethylphenyl)propan-2-ol (3ka)**

Colourless oil. 14 mg, 60%

**IR (KBr):** 2972, 2927, 2851, 1611, 1585 1492 1451, 1407, 1378, 1356 1282, 1190, 1167, 1125, 1073, 1030, 964, 827, 792, 747, 703, 668, 554  $\text{cm}^{-1}$ .

**$^1\text{H}$  NMR** (400 MHz,  $\text{CDCl}_3$ )  $\delta$  10.33 (br, 1H), 7.17 (d,  $J = 8.1$  Hz, 1H), 7.04 (d,  $J = 1.8$  Hz, 1H), 7.01 (dd,  $J = 8.1$ , 1.9 Hz, 1H), 3.02 (dq,  $J = 12.1$ , 7.2 Hz, 2H), 2.92 (dq,  $J = 12.2$ , 7.2 Hz, 2H), 2.61 (q,  $J = 7.6$  Hz, 2H), 1.54 (s, 6H), 1.22 (t,  $J = 7.6$  Hz, 3H), 1.07 (t,  $J = 7.2$  Hz, 6H).

**$^{13}\text{C}$  NMR** (101 MHz,  $\text{CDCl}_3$ )  $\delta$  147.1, 143.3, 142.4, 127.2, 125.7, 123.1, 74.5, 50.4, 33.9, 28.2, 15.4, 12.9.

**HRMS (ESI):** calcd. for  $\text{C}_{15}\text{H}_{25}\text{NO}$  ( $[\text{M}+\text{H}]^+$ ): 236.2009, found: 236.2013.

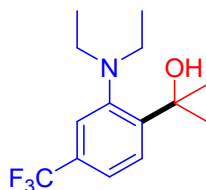

### 2-(2-(diethylamino)-4-(trifluoromethyl)phenyl)propan-2-ol (3la)

Colourless oil. 17 mg, 62%

**IR (KBr):** 2978, 2932, 2842, 1498, 1452, 1406, 1359, 1330, 1292, 1170, 1127, 1096, 1065, 1030, 966, 926, 893, 833, 729, 631 cm<sup>-1</sup>.

**<sup>1</sup>H NMR** (400 MHz, CDCl<sub>3</sub>) δ 9.79 (br, 1H), 7.32 (s, 1H), 7.28 – 7.21 (m, 2H), 2.97 – 2.84 (m, 2H), 2.81 – 2.70 (m, 2H), 1.40 (s, 6H), 0.91 (t, *J* = 7.2 Hz, 6H).

**<sup>13</sup>C NMR** (101 MHz, CDCl<sub>3</sub>) δ 149.4, 148.0, 129.8 (q, *J* = 32.7 Hz), 123.8 (q, *J* = 272.7 Hz), 122.9 (q, *J* = 3.6 Hz), 121.5 (q, *J* = 3.8 Hz), 74.7, 50.6, 33.6, 12.8.

**<sup>19</sup>F NMR** (282 MHz, CDCl<sub>3</sub>) δ -62.9.

**HRMS (ESI):** calcd. for C<sub>14</sub>H<sub>20</sub>F<sub>3</sub>NO ([M+H]<sup>+</sup>): 276.1570, found: 276.1573.

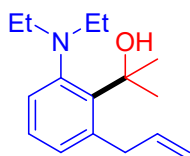

### 2-(2-allyl-6-(diethylamino)phenyl)propan-2-ol (3ma)

Colorless oil. 19 mg, 78%

**<sup>1</sup>H NMR** (600 MHz, CDCl<sub>3</sub>) δ 12.12 (s, 1H), 7.18 (t, *J* = 7.9 Hz, 1H), 7.11 (d, *J* = 8.7 Hz, 2H), 6.01 – 5.91 (m, 1H), 5.09 (d, *J* = 9.8 Hz, 1H), 5.01 (d, *J* = 17.0 Hz, 1H), 3.56 (d, *J* = 5.4 Hz, 2H), 3.07 – 2.98 (m, 2H), 2.93 – 2.82 (m, 2H), 1.66 (s, 6H), 1.07 (t, *J* = 7.1 Hz, 6H).

**<sup>13</sup>C NMR** (151 MHz, CDCl<sub>3</sub>) δ 147.8, 144.1, 136.8, 133.7, 130.2, 126.4, 125.4, 123.0, 75.4, 50.6, 32.1, 14.3, 12.7.

**HRMS (ESI):** calcd. for C<sub>16</sub>H<sub>25</sub>NO ([M+H]<sup>+</sup>): 248.2009, found: 248.2006.

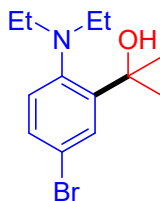

### 2-(5-bromo-2-(diethylamino)phenyl)propan-2-ol (3na)

Colourless oil. 20mg, 70 %

**<sup>1</sup>H NMR** (400 MHz, CDCl<sub>3</sub>) δ 10.0 (s, 1H), 7.4 (d, *J* = 2.4 Hz, 1H), 7.3 (dd, *J* = 8.6, 2.4 Hz, 1H), 7.1 (d, *J* = 8.6 Hz, 1H), 3.0 (dq, *J* = 12.3, 7.2 Hz, 2H), 2.9 (dq, *J* = 12.3, 7.2 Hz, 2H), 1.5 (s, 6H), 1.1 (t, *J* = 7.2 Hz, 6H).

**<sup>13</sup>C NMR** (101 MHz, CDCl<sub>3</sub>) δ 147.8, 146.5, 130.5, 130.4, 126.1, 119.7, 74.5, 50.5, 33.7, 12.8.

**HRMS (ESI)**: calcd. for C<sub>13</sub>H<sub>20</sub>BrNO ([M+H]<sup>+</sup>): 286.0801, found: 286.0805.

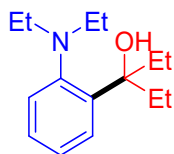

### 3-(2-(diethylamino)phenyl)pentan-3-ol (3ab)

Colourless oil. 18 mg, 77%

**IR (KBr)**: 3026, 2973, 2935, 2875, 2843, 1482, 1441, 1384, 1297, 1271, 1218, 1170, 1121, 1089, 1061, 1037, 975, 754, 674, 594, 559 cm<sup>-1</sup>.

**<sup>1</sup>H NMR** (400 MHz, CDCl<sub>3</sub>) δ 10.26 (br, 1H), 7.25 – 7.09 (m, 4H), 3.01 (dq, *J* = 12.4, 7.2 Hz, 2H), 2.88 (dq, *J* = 12.4, 7.3 Hz, 2H), 1.86 – 1.68 (m, 4H), 1.10 (t, *J* = 7.2 Hz, 6H), 0.80 (t, *J* = 7.3 Hz, 6H).

**<sup>13</sup>C NMR** (101 MHz, CDCl<sub>3</sub>) δ 149.8, 141.7, 128.0, 127.0, 125.9, 124.1, 80.3, 50.4, 37.1, 13.1, 8.5.

**HRMS (ESI)**: calcd. for C<sub>15</sub>H<sub>25</sub>NO ([M+H]<sup>+</sup>): 236.2009, found: 236.2012.

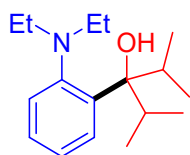

### 3-(2-(diethylamino)phenyl)-2,4-dimethylpentan-3-ol (3ac)

Colourless oil. 15 mg, 57 %

**IR (KBr)**: 2972, 2934, 2875, 2832, 1475, 1441, 1381, 1195, 1179, 1165, 1119, 1101, 1061, 1032, 1012, 998, 865, 771, 753, 673, 629 cm<sup>-1</sup>.

**<sup>1</sup>H NMR** (600 MHz, CDCl<sub>3</sub>) δ 10.58 (br, 1H), 7.24 – 7.18 (m, 2H), 7.19 – 7.10 (m, 2H), 3.07 – 2.98 (m, 2H), 2.92 – 2.83 (m, 2H), 2.26 (hept, *J* = 6.8 Hz, 2H), 1.12 (t, *J* = 7.2 Hz, 6H), 0.86 (dd, *J* = 22.0, 6.8 Hz, 12H).

**<sup>13</sup>C NMR** (101 MHz, CDCl<sub>3</sub>) δ 151.4, 139.1, 128.1, 126.9, 125.1, 124.3, 84.2, 50.5, 36.5, 18.6, 17.1, 13.2.

**HRMS (ESI):** calcd. for C<sub>17</sub>H<sub>29</sub>NO ([M+H]<sup>+</sup>): 264.2322, found: 264.2325.

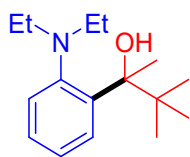

**2-(2-(diethylamino)phenyl)-3,3-dimethylbutan-2-ol (3ad)**

Colourless oil. 14 mg, 56 %

**IR (KBr):** 3064, 2978, 2873, 2829, 1787, 1483, 1443, 1388, 1368, 1294, 1276, 1215, 1188, 1167, 1061, 1029, 1004, 935, 759, 729 cm<sup>-1</sup>.

**<sup>1</sup>H NMR** (400 MHz, CDCl<sub>3</sub>) δ 10.44 (br, 1H), 7.25 – 7.18 (m, 3H), 7.13 (ddd, *J* = 8.0, 6.1, 2.5 Hz, 1H), 3.15 (dq, *J* = 12.0, 7.3 Hz, 1H), 2.98 (q, *J* = 7.1 Hz, 2H), 2.69 (dq, *J* = 12.0, 7.2 Hz, 1H), 1.53 (s, 3H), 1.25 (t, *J* = 7.1 Hz, 3H), 0.95 (m, 12H).

**<sup>13</sup>C NMR** (101 MHz, CDCl<sub>3</sub>) δ 149.9, 141.7, 129.7, 127.3, 124.7, 124.1, 81.7, 51.2, 49.8, 40.3, 26.5, 26.3, 13.7, 12.1.

**HRMS (ESI):** calcd. for C<sub>16</sub>H<sub>27</sub>NO ([M+H]<sup>+</sup>): 250.2165, found: 250.2170.

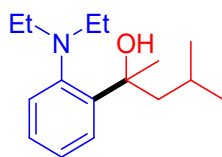

**2-(2-(diethylamino)phenyl)-4-methylpentan-2-ol (3ae)**

Colourless oil. 17 mg, 68 %

**IR (KBr):** 3062, 3027, 2973, 2926, 2867, 2837, 1482, 1443, 1383, 1367, 1282, 1218, 1167, 1123, 1098, 1048, 1029, 867, 757, 702, 683, 596 cm<sup>-1</sup>.

**<sup>1</sup>H NMR** (600 MHz, CDCl<sub>3</sub>) δ 10.26 (br, 1H), 7.25 – 7.19 (m, 3H), 7.15 (t, *J* = 7.1 Hz, 1H), 3.07 – 2.98 (m, 2H), 2.96 – 2.83 (m, 2H), 1.82 – 1.73 (m, 2H), 1.64 (dd, *J* = 13.6, 5.1 Hz, 1H), 1.50 (s, 3H), 1.11 (d, *J* = 7.2 Hz, 3H), 1.06 (t, *J* = 7.2 Hz, 3H), 0.94 (d, *J* = 6.3 Hz, 3H), 0.76 (d, *J* = 6.3 Hz, 3H).

**<sup>13</sup>C NMR** (101 MHz, CDCl<sub>3</sub>) δ 148.0, 144.4, 128.0, 127.2, 125.8, 124.1, 77.7, 54.0, 50.4, 50.4, 33.6, 24.9, 24.7, 24.6, 13.0, 12.8.

**HRMS (ESI):** calcd. for C<sub>16</sub>H<sub>27</sub>NO ([M+H]<sup>+</sup>): 250.2165, found: 250.2170.

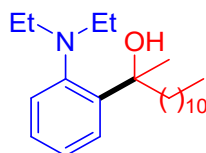

### 2-(2-(diethylamino)phenyl)tridecan-2-ol (3af)

Colourless oil. 24 mg, 69 %

**IR (KBr):** 3061, 3026, 2971, 2925, 2853, 1482, 1465, 1382, 1294, 1278, 1217, 1168, 1123, 1087, 1064, 1045, 757, 723, 682, 592, 558  $\text{cm}^{-1}$ .

**$^1\text{H}$  NMR** (600 MHz,  $\text{CDCl}_3$ )  $\delta$  10.26 (br, 1H), 7.20 (dq,  $J = 21.3, 7.1, 6.0$  Hz, 4H), 3.06 – 2.97 (m, 2H), 2.94 – 2.84 (m, 2H), 1.83 (td,  $J = 12.9, 4.3$  Hz, 1H), 1.69 (td,  $J = 12.9, 4.4$  Hz, 1H), 1.50 (s, 3H), 1.46 – 1.39 (m, 1H), 1.31 – 1.19 (m, 17H), 1.07 (dt,  $J = 15.2, 7.2$  Hz, 6H), 0.87 (t,  $J = 7.0$  Hz, 3H).

**$^{13}\text{C}$  NMR** (101 MHz,  $\text{CDCl}_3$ )  $\delta$  148.1, 144.1, 127.8, 127.1, 126.0, 124.1, 50.5, 50.4, 45.7, 33.0, 31.9, 30.1, 29.7, 29.7, 29.6, 29.4, 24.3, 22.7, 14.1, 13.1, 12.9.

**HRMS (ESI):** calcd. for  $\text{C}_{23}\text{H}_{41}\text{NO}$  ( $[\text{M}+\text{H}]^+$ ): 348.2361, found: 348.2362.

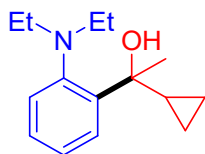

### 1-cyclopropyl-1-(2-(diethylamino)phenyl)ethan-1-ol (3ag)

Colourless oil. 15 mg, 64%

**IR (KBr):** 3063, 2974, 2926, 2834, 1598, 1576, 1483, 1447, 1383, 1278, 1218, 1169, 1122, 1102, 1064, 1044, 1018, 823, 756, 736, 591, 558, 528  $\text{cm}^{-1}$ .

**$^1\text{H}$  NMR** (400 MHz,  $\text{CDCl}_3$ )  $\delta$  10.26 (br, 1H), 7.42 (dt,  $J = 6.6, 1.5$  Hz, 1H), 7.25 – 7.17 (m, 3H), 3.09 – 2.97 (m, 2H), 2.97 – 2.81 (m, 2H), 1.48 (s, 3H), 1.25 (ddd,  $J = 8.5, 5.6, 2.9$  Hz, 1H), 1.07 (dt,  $J = 9.8, 7.2$  Hz, 6H), 0.59 (ddd,  $J = 9.2, 5.8, 3.5$  Hz, 1H), 0.53 – 0.39 (m, 2H), 0.28 (tdd,  $J = 8.6, 5.8, 3.4$  Hz, 1H).

**$^{13}\text{C}$  NMR** (101 MHz,  $\text{CDCl}_3$ )  $\delta$  147.3, 145.4, 127.9, 127.1, 126.0, 124.0, 74.7, 50.5, 50.2, 31.5, 24.2, 12.9, 12.7, 1.6, 0.9.

**HRMS (ESI):** calcd. for  $\text{C}_{15}\text{H}_{23}\text{NO}$  ( $[\text{M}+\text{H}]^+$ ): 234.1852, found: 234.1856.

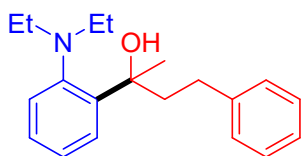

### 2-(2-(diethylamino)phenyl)-4-phenylbutan-2-ol (3ah)

Colourless oil. 19 mg, 64 %

**IR (KBr):** 3061, 3026, 2973, 2928, 2837, 1602, 1575, 1483, 1451, 1383, 1294, 1277, 1216, 1166, 1121, 1100, 1064, 1028, 759, 699, 622, 604  $\text{cm}^{-1}$ .

**<sup>1</sup>H NMR** (600 MHz, CDCl<sub>3</sub>) δ 10.58 (br, 1H), 7.23 (dq, *J* = 20.5, 7.6 Hz, 6H), 7.15 (dd, *J* = 14.8, 7.5 Hz, 3H), 3.05 (dq, *J* = 14.3, 7.2 Hz, 2H), 2.92 (ddq, *J* = 26.6, 13.9, 7.2 Hz, 2H), 2.82 (td, *J* = 13.1, 4.8 Hz, 1H), 2.38 (td, *J* = 13.1, 4.2 Hz, 1H), 2.15 (td, *J* = 13.2, 4.2 Hz, 1H), 2.04 (td, *J* = 13.3, 4.8 Hz, 1H), 1.56 (s, 3H), 1.10 (q, *J* = 7.7 Hz, 6H).

**<sup>13</sup>C NMR** (101 MHz, CDCl<sub>3</sub>) δ 148.1, 143.5, 143.3, 128.4, 128.3, 127.6, 127.4, 126.2, 125.4, 124.2, 50.8, 50.3, 47.9, 33.3, 30.9, 13.2, 12.9.

**HRMS (ESI):** calcd. for C<sub>20</sub>H<sub>27</sub>NO ([M+H]<sup>+</sup>): 298.2165, found: 298.2167.

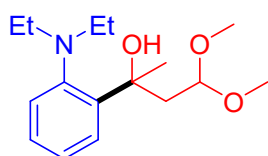

### 2-(2-(diethylamino)phenyl)-4,4-dimethoxybutan-2-ol (3ai)

Colourless oil. 17 mg, 60 %

**IR (KBr):** 3060, 2975, 2933, 2830, 1483, 1444, 1382, 1296, 1279, 1211, 1192, 1165, 1122, 1074, 1050, 972, 941, 911, 898, 820, 758, 705, 620 cm<sup>-1</sup>.

**<sup>1</sup>H NMR** (600 MHz, CDCl<sub>3</sub>) δ 10.57 (br, 1H), 7.23 (d, *J* = 3.8 Hz, 3H), 7.20 – 7.15 (m, 1H), 4.62 (t, *J* = 4.9 Hz, 1H), 3.34 (s, 3H), 3.17 (s, 3H), 3.02 (ddt, *J* = 20.8, 14.1, 7.0 Hz, 2H), 2.91 (ddq, *J* = 26.8, 13.8, 7.2 Hz, 2H), 2.16 – 2.06 (m, 2H), 1.55 (s, 3H), 1.11 (t, *J* = 7.2 Hz, 3H), 1.05 (t, *J* = 7.2 Hz, 3H).

**<sup>13</sup>C NMR** (151 MHz, CDCl<sub>3</sub>) δ 147.5, 143.9, 127.9, 127.4, 125.9, 124.1, 102.7, 96.7, 75.5, 53.1, 52.1, 50.6, 50.2, 48.4, 32.1, 13.0, 12.7.

**HRMS (ESI):** calcd. for C<sub>16</sub>H<sub>27</sub>NO<sub>3</sub> ([M+H]<sup>+</sup>): 282.2064, found: 282.2068.

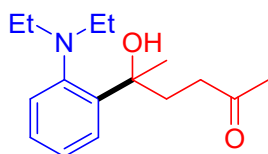

### 5-(2-(diethylamino)phenyl)-5-hydroxyhexan-2-one (3aj)

Yellow oil. 15 mg, 57 %

**IR (KBr):** 3060, 3025, 2974, 2930, 2875, 2836, 1483, 1443, 1367, 1280, 1217, 1164, 1121, 1085, 1043, 1029, 936, 894, 760, 683, 561, 548 cm<sup>-1</sup>.

**<sup>1</sup>H NMR** (600 MHz, CDCl<sub>3</sub>) δ 10.53 (br, 1H), 7.28 – 7.20 (m, 2H), 7.21 – 7.14 (m, 2H), 3.09 – 2.97 (m, 2H), 2.90 (ddq, *J* = 30.1, 12.3, 7.2 Hz, 2H), 2.66 (ddd, *J* = 16.6,



10.9, 5.0 Hz, 1H), 2.28 (ddd,  $J = 16.7, 10.9, 4.7$  Hz, 1H), 2.21 – 2.13 (m, 1H), 2.10 (s, 3H), 2.00 (ddd,  $J = 14.0, 10.9, 5.0$  Hz, 1H), 1.51 (s, 3H), 1.08 (dt,  $J = 11.3, 7.2$  Hz, 6H)

$^{13}\text{C}$  NMR (101 MHz,  $\text{CDCl}_3$ )  $\delta$  209.7, 147.9, 143.0, 127.6, 127.5, 126.3, 124.3, 76.4, 50.9, 50.1, 39.2, 38.8, 33.2, 29.9, 13.1, 12.8.

HRMS (ESI): calcd. for  $\text{C}_{16}\text{H}_{25}\text{NO}_2$  ( $[\text{M}+\text{H}]^+$ ): 264.1958, found: 264.1960.

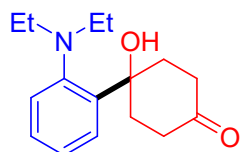

#### 4-(2-(diethylamino)phenyl)-4-hydroxycyclohexan-1-one (3ak)

White solid. 11 mg, 42%, m.p. 71.4 - 73.2 °C

IR (KBr): 3026, 2973, 2931, 2873, 2835, 1711, 1598, 1483, 1436, 1382, 1338, 1308, 1279, 1247, 1124, 1087, 1053, 1026, 866, 770, 755, 716, 671  $\text{cm}^{-1}$ .

$^1\text{H}$  NMR (600 MHz,  $\text{CDCl}_3$ )  $\delta$  11.12 (br, 1H), 7.29 (s, 2H), 7.26 – 7.19 (m, 2H), 3.12 – 3.00 (m, 4H), 2.99 – 2.90 (m, 2H), 2.33 – 2.24 (m, 4H), 2.13 (d,  $J = 12.3$  Hz, 2H), 1.08 (t,  $J = 7.2$  Hz, 6H).

$^{13}\text{C}$  NMR (101 MHz,  $\text{CDCl}_3$ )  $\delta$  213.1, 147.4, 142.8, 128.0, 126.7, 126.4, 124.3, 74.4, 50.8, 41.3, 37.6, 12.8.

HRMS (ESI): calcd. for  $\text{C}_{16}\text{H}_{23}\text{NO}_2$  ( $[\text{M}+\text{H}]^+$ ): 262.1802, found: 262.1804.

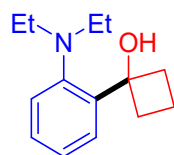

#### 1-(2-(diethylamino)phenyl)cyclobutan-1-ol (3al)

Colourless oil. 15 mg, 68 %

IR (KBr): 3064, 3028, 2976, 2935, 2873, 2837, 1598, 1575.0, 1484, 1446, 1384, 1291, 1223, 1168, 1146, 1129, 1086, 1059, 1028, 897, 752, 683  $\text{cm}^{-1}$ .

$^1\text{H}$  NMR (600 MHz,  $\text{CDCl}_3$ )  $\delta$  9.64 (br, 1H), 7.51 (d,  $J = 7.5$  Hz, 1H), 7.27 – 7.19 (m, 3H), 2.97 (q,  $J = 7.2$  Hz, 4H), 2.56 – 2.50 (m, 2H), 2.49 – 2.42 (m, 2H), 2.04 (ddq,  $J = 14.8, 9.9, 4.8$  Hz, 1H), 1.85 – 1.75 (m, 1H), 1.04 (t,  $J = 7.2$  Hz, 6H).

$^{13}\text{C}$  NMR (101 MHz,  $\text{CDCl}_3$ )  $\delta$  147.4, 142.8, 127.3, 125.9, 125.7, 123.8, 78.4, 49.10, 38.9, 13.3, 12.5.

---

**HRMS (ESI):** calcd. for C<sub>14</sub>H<sub>21</sub>NO ([M+H]<sup>+</sup>): 220.1696, found: 220.1698.

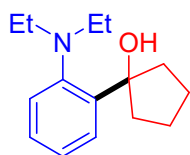

**1-(2-(diethylamino)phenyl)cyclopentan-1-ol (3am)**

Colourless oil. 16 mg, 69%

**IR (KBr):** 3061, 3025, 2971, 2870, 2845, 1722, 1481, 1383, 1340, 1290, 1168, 1121, 1013, 946, 911, 891, 753, 602, 571, 540, 472, 458 cm<sup>-1</sup>.

**<sup>1</sup>H NMR** (600 MHz, CDCl<sub>3</sub>) δ 10.08 (br, 1H), 7.27 – 7.20 (m, 3H), 7.16 (ddd, *J* = 8.4, 6.8, 1.9 Hz, 1H), 3.06 – 2.98 (m, 2H), 2.97 – 2.89 (m, 2H), 2.07 – 1.92 (m, 6H), 1.77 (s, 2H), 1.07 (t, *J* = 7.2 Hz, 6H).

**<sup>13</sup>C NMR** (101 MHz, CDCl<sub>3</sub>) δ 148.1, 143.9, 127.2, 126.9, 125.9, 124.0, 84.9, 50.3, 44.9, 24.7, 12.8.

**HRMS (ESI):** calcd. for C<sub>15</sub>H<sub>23</sub>NO ([M+H]<sup>+</sup>): 234.1852, found: 234.1854.

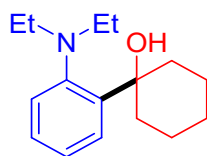

**1-(2-(diethylamino)phenyl)cyclohexan-1-ol (3an)**

Colourless oil. 18 mg, 73%

**IR (KBr):** 3060, 2974, 2930, 2845, 1481, 1383, 1281, 1218, 1168, 1141, 1129, 1064, 1047, 1032, 1016, 989, 906, 884, 831, 752, 695, 601, 573, 495 cm<sup>-1</sup>.

**<sup>1</sup>H NMR** (400 MHz, CDCl<sub>3</sub>) δ 10.40 (br, 1H), 7.32 (dd, *J* = 8.1, 1.4 Hz, 1H), 7.24 – 7.21 (m, 2H), 7.21 – 7.15 (m, 1H), 3.01 (dq, *J* = 12.2, 7.2 Hz, 2H), 2.90 (dq, *J* = 12.2, 7.2 Hz, 2H), 1.94 – 1.69 (m, 7H), 1.61 – 1.53 (m, 2H), 1.24 (qt, *J* = 13.1, 3.8 Hz, 1H), 1.05 (t, *J* = 7.2 Hz, 6H).

**<sup>13</sup>C NMR** (101 MHz, CDCl<sub>3</sub>) δ 147.3, 145.7, 127.4, 127.2, 126.0, 124.0, 75.7, 50.7, 41.3, 25.8, 22.0, 12.9.

**HRMS (ESI):** calcd. for C<sub>16</sub>H<sub>25</sub>NO ([M+H]<sup>+</sup>): 248.2009, found: 248.2010.

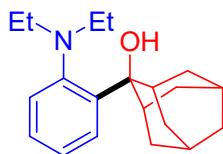

**(1R,3S,5r,7r)-2-(2-(diethylamino)phenyl)adamantan-2-ol (3ao)**

White solid. 23 mg, 77%

**IR (KBr):** 2968, 2902, 2851, 1595, 1573, 1481, 1450, 1384, 1334, 1289, 1186, 1163, 1139, 1118, 1103, 1044, 1011, 857, 794, 757, 736, 686, 665, 531  $\text{cm}^{-1}$ .

**$^1\text{H}$  NMR** (600 MHz,  $\text{CDCl}_3$ )  $\delta$  7.59 (d,  $J = 8.0$  Hz, 1H), 7.27 (d,  $J = 7.8$  Hz, 1H), 7.22 (t,  $J = 7.6$  Hz, 1H), 7.13 (t,  $J = 7.6$  Hz, 1H), 6.01 (br, 1H), 3.01 (dq,  $J = 14.1, 7.2$  Hz, 2H), 2.84 (dq,  $J = 13.4, 7.3$  Hz, 2H), 2.62 (d,  $J = 12.4$  Hz, 2H), 2.45 (s, 2H), 1.90 (d,  $J = 12.5$  Hz, 2H), 1.87 – 1.76 (m, 4H), 1.73 (s, 2H), 1.59 (d,  $J = 12.3$  Hz, 2H), 1.04 (t,  $J = 7.2$  Hz, 6H).

**$^{13}\text{C}$  NMR** (101 MHz,  $\text{CDCl}_3$ )  $\delta$  151.7, 144.2, 127.9, 127.3, 125.0, 124.9, 51.0, 38.3, 37.0, 35.4, 33.5, 27.4, 26.9, 13.2.

**HRMS (ESI):** calcd. for  $\text{C}_{20}\text{H}_{29}\text{NO}$  ( $[\text{M}+\text{H}]^+$ ): 300.2322, found: 300.2323.

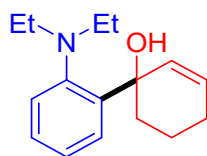

**2'-(diethylamino)-3,4-dihydro-[1,1'-biphenyl]-1(2H)-ol (3ap)**

Colourless oil. 15 mg, 61%

**IR (KBr):** 3022, 2933, 2832, 1728, 1715, 1650, 1575, 1481, 1451, 1436, 1382, 1338, 1274, 1219, 1195, 1167, 1121, 1086, 1063, 853, 771, 755, 718, 662  $\text{cm}^{-1}$ .

**$^1\text{H}$  NMR** (600 MHz,  $\text{CDCl}_3$ )  $\delta$  10.16 (br, 1H), 7.27 – 7.19 (m, 3H), 7.18 – 7.12 (m, 1H), 5.97 – 5.90 (m, 1H), 5.75 (d,  $J = 9.9$  Hz, 1H), 3.10 – 2.87 (m, 4H), 2.18 – 2.10 (m, 1H), 2.09 – 1.92 (m, 3H), 1.79 (td,  $J = 12.6, 3.0$  Hz, 1H), 1.67 – 1.59 (m, 1H), 1.12 (t,  $J = 7.2$  Hz, 3H), 1.04 (t,  $J = 7.2$  Hz, 3H).

**$^{13}\text{C}$  NMR** (101 MHz,  $\text{CDCl}_3$ )  $\delta$  148.0, 144.1, 133.8, 129.1, 128.5, 127.4, 125.9, 123.9, 74.4, 51.2, 49.8, 42.1, 25.0, 18.9, 13.0, 12.8.

**HRMS (ESI):** calcd. for  $\text{C}_{16}\text{H}_{23}\text{NO}$  ( $[\text{M}+\text{H}]^+$ ): 246.1852, found: 246.1854.

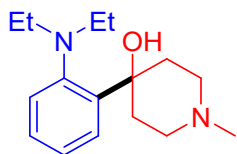

#### 4-(2-(diethylamino)phenyl)-1-methylpiperidin-4-ol (3aq)

Colourless oil. 14 mg, 53%

**IR (KBr):** 3424, 2931, 2669, 2595, 2515, 1726, 1470, 1380, 1285, 1261, 1207, 1063, 1038, 980, 886, 773, 756, 609, 575, 546, 510, 474  $\text{cm}^{-1}$ .

**$^1\text{H}$  NMR** (600 MHz,  $\text{CDCl}_3$ )  $\delta$  11.56 (br, 1H), 7.45 (d,  $J = 7.5$  Hz, 1H), 7.32 – 7.24 (m, 3H), 3.39 – 3.28 (m, 4H), 3.04 (dt,  $J = 14.3, 7.2$  Hz, 2H), 2.92 (dt,  $J = 12.6, 7.0$  Hz, 2H), 2.86 – 2.79 (m, 2H), 2.78 (s, 3H), 1.83 (d,  $J = 14.0$  Hz, 2H), 1.03 (t,  $J = 7.2$  Hz, 6H).

**$^{13}\text{C}$  NMR** (151 MHz,  $\text{CD}_3\text{OD}$ )  $\delta$  146.8, 140.9, 128.5, 127.6, 127.1, 123.9, 71.4, 51.0, 50.8, 43.6, 38.3, 12.7.

**HRMS (ESI):** calcd. for  $\text{C}_{16}\text{H}_{26}\text{N}_2\text{O}$  ( $[\text{M}+\text{H}]^+$ ): 263.2118, found: 263.2119.

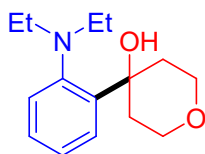

#### 4-(2-(diethylamino)phenyl)tetrahydro-2H-pyran-4-ol (3ar)

Colourless oil. 17 mg, 68%

**IR (KBr):** 2951, 2867, 1598, 1575, 1481, 1449, 1425, 1383, 1280, 1238, 1169, 1129, 1099, 1064, 1030, 1017, 978, 840, 769, 753, 707, 554, 537  $\text{cm}^{-1}$ .

**$^1\text{H}$  NMR** (600 MHz,  $\text{CDCl}_3$ )  $\delta$  10.78 (br, 1H), 7.32 (d,  $J = 7.8$  Hz, 1H), 7.24 (d,  $J = 17.9$  Hz, 3H), 4.02 (t,  $J = 11.8$  Hz, 2H), 3.85 (dd,  $J = 11.2, 4.8$  Hz, 2H), 3.03 (dq,  $J = 14.0, 7.2$  Hz, 2H), 2.91 (dq,  $J = 13.7, 7.3$  Hz, 2H), 2.18 (td,  $J = 12.8, 4.8$  Hz, 2H), 1.64 (d,  $J = 13.1$  Hz, 2H), 1.05 (t,  $J = 7.2$  Hz, 6H).

**$^{13}\text{C}$  NMR** (101 MHz,  $\text{CDCl}_3$ )  $\delta$  147.2, 143.8, 127.7, 127.3, 126.4, 124.1, 73.2, 64.1, 50.8, 41.5, 12.8.

**HRMS (ESI):** calcd. for  $\text{C}_{15}\text{H}_{23}\text{NO}_2$  ( $[\text{M}+\text{H}]^+$ ): 250.1802, found: 250.1803.

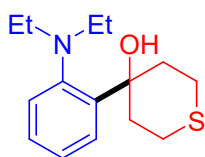

#### 4-(2-(diethylamino)phenyl)tetrahydro-2H-thiopyran-4-ol (3as)

Colourless oil. 16 mg, 60%

**IR (KBr):** 3058, 3025, 2972, 2924, 2831, 1481, 1448, 1422, 1381, 1274, 1214, 1123, 1077, 1065, 970, 941, 895, 769, 752, 698, 657, 602, 574, 539  $\text{cm}^{-1}$ .

**$^1\text{H}$  NMR** (600 MHz,  $\text{CDCl}_3$ )  $\delta$  10.75 (br, 1H), 7.32 (d,  $J = 7.8$  Hz, 1H), 7.27 – 7.20 (m, 3H), 3.34 (t,  $J = 13.3$  Hz, 2H), 3.01 (dt,  $J = 14.0, 7.1$  Hz, 2H), 2.90 (dq,  $J = 14.0, 7.2$  Hz, 2H), 2.39 (d,  $J = 13.0$  Hz, 2H), 2.13 (td,  $J = 13.0, 3.6$  Hz, 2H), 2.00 (d,  $J = 13.2$  Hz, 2H), 1.04 (t,  $J = 7.2$  Hz, 6H).

**$^{13}\text{C}$  NMR** (101 MHz,  $\text{CDCl}_3$ )  $\delta$  146.8, 144.4, 127.7, 127.4, 126.3, 124.1, 74.2, 50.8, 41.9, 24.3, 12.8.

**HRMS (ESI):** calcd. for  $\text{C}_{15}\text{H}_{23}\text{NOS}$  ( $[\text{M}+\text{H}]^+$ ): 266.1573, found: 266.1574.

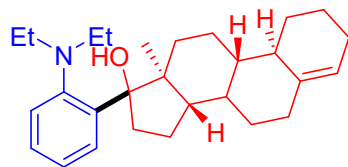

#### (9S,10R,13S,14S,17S)-17-(2-(diethylamino)phenyl)-13-methyl-2,3,6,7,8,9,10,11,12,13,14,15,16,17-tetradecahydro-1H-cyclopenta[a]phenanthren-17-ol (3at)

Yellow solid. 23 mg, 59%;  $[\alpha]_D^{28.0} = +79.37$  ( $c$  0.015,  $\text{CHCl}_3$ ), m.p. 165.8-167.0  $^\circ\text{C}$

**IR (KBr):** 2923, 2851, 1741, 1596, 1541, 1472, 1447, 1381, 1336, 1299, 1265, 1217, 1191, 1143, 1120, 1086, 1054, 1030, 837, 756, 739, 432  $\text{cm}^{-1}$ .

**$^1\text{H}$  NMR** (600 MHz,  $\text{CDCl}_3$ )  $\delta$  9.52 (br, 1H), 7.26 – 7.18 (m, 2H), 7.17 – 7.11 (m, 1H), 7.05 (d,  $J = 7.8$  Hz, 1H), 5.36 (d,  $J = 2.7$  Hz, 1H), 3.14 (dq,  $J = 12.1, 7.3$  Hz, 1H), 2.96 (ddq,  $J = 26.6, 12.9, 7.0, 6.6$  Hz, 2H), 2.75 (dq,  $J = 12.1, 7.2$  Hz, 1H), 2.29 – 2.16 (m, 2H), 2.15 – 2.06 (m, 1H), 2.01 (t,  $J = 13.5$  Hz, 1H), 1.92 – 1.80 (m, 3H), 1.78 – 1.68 (m, 3H), 1.64 – 1.58 (m, 2H), 1.53 (qd,  $J = 12.5, 5.4$  Hz, 1H), 1.47 – 1.36 (m, 2H), 1.34 – 1.28 (m, 2H), 1.25 (t,  $J = 7.1$  Hz, 3H), 1.12 (qd,  $J = 13.4, 4.3$  Hz, 1H), 1.05 (s, 3H), 0.99 – 0.94 (m, 1H), 0.93 (t,  $J = 7.2$  Hz, 3H), 0.87 (td,  $J = 12.6, 3.5$  Hz, 1H), 0.43 – 0.31 (m, 2H).

**$^{13}\text{C}$  NMR** (151 MHz,  $\text{CDCl}_3$ )  $\delta$  150.6, 142.9, 140.6, 128.9, 127.2, 125.1, 123.95, 119.7, 89.3, 51.8, 49.8, 49.7, 49.2, 49.0, 42.0, 41.9, 39.9, 35.6, 33.5, 31.9, 28.6, 26.2, 25.5, 24.2, 22.0, 15.8, 13.9, 12.3.

**HRMS (ESI):** calcd. for C<sub>28</sub>H<sub>41</sub>NO ([M+H]<sup>+</sup>): 408.3261, found: 408.3260.

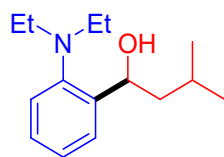

**1-(2-(diethylamino)phenyl)-3-methylbutan-1-ol (3au)**

Colourless oil. 13mg, 55%

**IR (KBr):** 3026, 2955, 2933, 2868, 2818, 1959, 1597, 1486, 1465, 1449, 1383, 1367, 1293, 1234, 1170, 1120, 1064, 1045, 838, 793, 749, 545, 419 cm<sup>-1</sup>.

**<sup>1</sup>H NMR** (600 MHz, CDCl<sub>3</sub>) δ 7.37 (br, 1H), 7.23 (dt, *J* = 3.5, 1.6 Hz, 2H), 7.14 (dd, *J* = 3.6, 2.0 Hz, 2H), 4.96 (dd, *J* = 10.2, 3.7 Hz, 1H), 3.05 – 2.90 (m, 4H), 2.03 – 1.90 (m, 1H), 1.73 (ddd, *J* = 14.0, 10.1, 4.5 Hz, 1H), 1.48 (ddd, *J* = 13.2, 9.1, 3.7 Hz, 1H), 1.06 (t, *J* = 7.2 Hz, 6H), 0.99 (dd, *J* = 10.5, 6.7 Hz, 6H).

**<sup>13</sup>C NMR** (151 MHz, CDCl<sub>3</sub>) δ 148.6, 141.5, 127.5, 127.2, 125.4, 123.6, 72.0, 49.6, 49.2, 24.7, 23.9, 21.7, 12.8.

**HRMS (ESI):** calcd. for C<sub>15</sub>H<sub>25</sub>NO ([M+H]<sup>+</sup>): 236.2009, found: 236.2010.

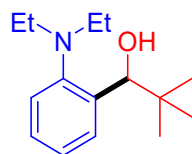

**1-(2-(diethylamino)phenyl)-2,2-dimethylpropan-1-ol (3av)**

Colourless oil. 11 mg, 47%

**IR (KBr):** 2971, 2869, 1483, 1463, 1447, 1385, 1361, 1294, 1235, 1215, 1179, 1169, 1119, 1099, 1069, 1042, 1009, 825, 794, 767 cm<sup>-1</sup>.

**<sup>1</sup>H NMR** (600 MHz, CDCl<sub>3</sub>) δ 7.25 – 7.20 (m, 2H), 7.15 (d, *J* = 7.3 Hz, 2H), 7.11 (ddd, *J* = 8.0, 5.7, 2.6 Hz, 1H), 4.67 (s, 1H), 3.05 (dq, *J* = 12.9, 7.4 Hz, 2H), 2.85 (dq, *J* = 14.3, 7.1 Hz, 2H), 1.07 (t, *J* = 7.1 Hz, 6H), 0.95 (s, 9H).

**<sup>13</sup>C NMR** (151 MHz, CDCl<sub>3</sub>) δ 150.7, 137.4, 130.0, 127.4, 124.3, 123.9, 82.5, 50.0, 37.6, 26.5, 12.8.

**HRMS (ESI):** calcd. for C<sub>15</sub>H<sub>25</sub>NO ([M+H]<sup>+</sup>): 236.2009, found: 236.2010.

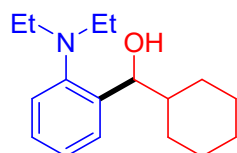

### Cyclohexyl(2-(diethylamino)phenyl)methanol (3aw)

Colourless oil. 15 mg, 57%

**IR (KBr):** 3358, 2971, 2851, 1959, 1594, 1509, 1450, 1419, 1385, 1365, 1315, 1083, 1042, 925, 866, 837, 817, 668, 611, 579, 484, 472, 419  $\text{cm}^{-1}$ .

**$^1\text{H}$  NMR** (600 MHz,  $\text{CDCl}_3$ )  $\delta$  7.26 – 7.20 (m, 2H), 7.16 – 7.07 (m, 2H), 4.55 (d,  $J = 7.2$  Hz, 1H), 2.99 (ddd,  $J = 14.4, 9.7, 6.5$  Hz, 2H), 2.91 (ddt,  $J = 11.6, 7.0, 3.7$  Hz, 2H), 1.96 (d,  $J = 12.3$  Hz, 1H), 1.80 – 1.68 (m, 2H), 1.66 – 1.55 (m, 2H), 1.43 – 1.36 (m, 1H), 1.22 – 1.10 (m, 5H), 1.08 – 1.01 (m, 6H).

**$^{13}\text{C}$  NMR** (151 MHz,  $\text{CDCl}_3$ )  $\delta$  149.4, 139.7, 128.7, 127.2, 125.1, 123.8, 79.3, 49.8, 46.1, 30.3, 28.5, 26.5, 26.3, 12.8.

**HRMS (ESI):** calcd. for  $\text{C}_{17}\text{H}_{27}\text{NO}$  ( $[\text{M}+\text{H}]^+$ ): 262.2165, found: 262.2166.

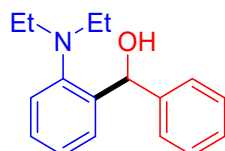

### (2-(diethylamino)phenyl)(phenyl)methanol (3ax)

Colourless oil. 10 mg, 39%

**IR (KBr):** 3061, 3028, 2972, 2931, 2872, 1650, 1598, 1580, 1487, 1451, 1383, 1293, 1234, 1172, 1120, 1097, 1062, 1026, 794, 765, 744, 699, 650, 419  $\text{cm}^{-1}$ .

**$^1\text{H}$  NMR** (600 MHz,  $\text{CDCl}_3$ )  $\delta$  8.24 (br, 1H), 7.39 (d,  $J = 7.6$  Hz, 2H), 7.33 (t,  $J = 7.6$  Hz, 2H), 7.28 – 7.23 (m, 3H), 7.10 (ddd,  $J = 8.3, 5.7, 2.8$  Hz, 1H), 6.97 (d,  $J = 7.7$  Hz, 1H), 6.00 (s, 1H), 2.90 (qd,  $J = 12.7, 6.3$  Hz, 4H), 1.02 (t,  $J = 7.2$  Hz, 6H).

**$^{13}\text{C}$  NMR** (151 MHz,  $\text{CDCl}_3$ )  $\delta$  148.7, 144.6, 140.0, 129.3, 128.1, 127.7, 126.9, 126.9, 125.2, 123.8, 76.1, 49.0, 12.5.

**HRMS (ESI):** calcd. for  $\text{C}_{17}\text{H}_{21}\text{NO}$  ( $[\text{M}+\text{H}]^+$ ): 256.1696, found: 256.1697.

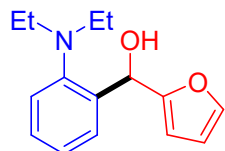

### (2-(diethylamino)phenyl)(furan-2-yl)methanol (3ay)

Colourless oil. 13 mg, 53%

**IR (KBr):** 2972, 2930, 2872, 1663, 1597, 1581, 1488, 1449, 1382, 1295, 1238, 1224, 1171, 1085, 1064, 1031, 1008, 939, 834, 815, 793, 766, 733, 598, 563, 459  $\text{cm}^{-1}$ .

**$^1\text{H}$  NMR** (600 MHz,  $\text{CDCl}_3$ )  $\delta$  8.71 (br, 1H), 7.38 – 7.36 (m, 1H), 7.29 (dd,  $J = 16.5,$

8.2 Hz, 2H), 7.18 – 7.13 (m, 1H), 7.10 (d,  $J = 7.6$  Hz, 1H), 6.31 (dd,  $J = 3.3, 1.8$  Hz, 1H), 6.18 (d,  $J = 3.2$  Hz, 1H), 6.02 (s, 1H), 3.03 – 2.89 (m, 4H), 1.04 (t,  $J = 7.1$  Hz, 6H).

$^{13}\text{C}$  NMR (151 MHz,  $\text{CDCl}_3$ )  $\delta$  157.2, 148.6, 141.9, 137.1, 128.9, 128.0, 125.5, 123.8, 110.0, 106.39, 71.1, 49.2, 12.5.

**HRMS (ESI):** calcd. for  $\text{C}_{15}\text{H}_{19}\text{NO}_2$  ( $[\text{M}+\text{H}]^+$ ): 246.1489, found: 246.1491.

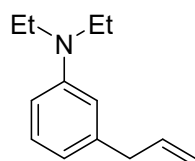

### 3-allyl-*N,N*-diethylaniline (5)

Yellow oil, 16 mg, 85%

$^1\text{H}$  NMR (600 MHz,  $\text{CDCl}_3$ )  $\delta$  7.14 (t,  $J = 7.8$  Hz, 1H), 6.55 – 6.45 (m, 3H), 6.03 – 5.91 (m, 1H), 5.10 (d,  $J = 16.2$  Hz, 1H), 5.04 (d,  $J = 10.0$  Hz, 1H), 3.37 – 3.29 (m, 6H), 1.15 (t,  $J = 7.1$  Hz, 6H).

$^{13}\text{C}$  NMR (151 MHz,  $\text{CDCl}_3$ )  $\delta$  148.0, 141.1, 137.9, 129.2, 115.7, 115.3, 112.1, 109.8, 44.3, 40.8, 12.6.

**HRMS (ESI):** calcd. for  $\text{C}_{13}\text{H}_{19}\text{N}$  ( $[\text{M}+\text{H}]^+$ ): 190.1590, found: 190.1590.

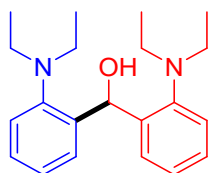

### bis(2-(diethylamino)phenyl)methanol (8)

Colourless oil.

**IR (KBr):** 3384, 3061, 3027, 2971, 2932, 2872, 2816, 1598, 1485, 1450, 1382, 1295, 1237, 1174, 1118, 1093, 1017, 794, 756, 712, 668, 646, 484, 472, 419  $\text{cm}^{-1}$ .

$^1\text{H}$  NMR (600 MHz,  $\text{CDCl}_3$ )  $\delta$  8.11(br, 1H), 7.23 (dt,  $J = 13.5, 7.7$  Hz, 4H), 7.05 (t,  $J = 7.2$  Hz, 2H), 6.99 (d,  $J = 7.7$  Hz, 2H), 6.75 (s, 1H), 3.05 (q,  $J = 7.1$  Hz, 8H), 1.05 (t,  $J = 7.1$  Hz, 12H).

$^{13}\text{C}$  NMR (151 MHz,  $\text{CDCl}_3$ )  $\delta$  149.3, 141.4, 129.3, 127.4, 124.7, 122.8, 69.4, 48.7, 12.7.

**HRMS (ESI):** calcd. for  $\text{C}_{21}\text{H}_{30}\text{N}_2\text{O}$  ( $[\text{M}+\text{H}]^+$ ): 327.2430, found: 327.2435.



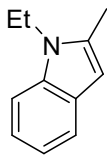

### 1-ethyl-2-methyl-1H-indole(9)

Colorless oil.

$^1\text{H NMR}$  (600 MHz,  $\text{CDCl}_3$ )  $\delta$  7.52 (d,  $J = 7.8$  Hz, 1H), 7.32 – 7.20 (m, 1H), 7.13 (t,  $J = 7.5$  Hz, 1H), 7.05 (t,  $J = 7.4$  Hz, 1H), 6.23 (s, 1H), 4.13 (q,  $J = 7.2$  Hz, 2H), 2.43 (s, 3H), 1.34 (t,  $J = 7.2$  Hz, 3H).

$^{13}\text{C NMR}$  (101 MHz,  $\text{CDCl}_3$ )  $\delta$  136.2, 136.0, 128.2, 120.4, 119.7, 119.1, 108.8, 99.8, 37.7, 15.3, 12.6. The spectra data were consistent with the literature.<sup>6</sup>

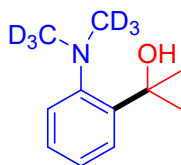

### 2-(2-(bis(methyl-d3)amino)phenyl)propan-2-ol (3b'a)

Colorless oil, 13 mg, 70%

$^1\text{H NMR}$  (600 MHz,  $\text{CDCl}_3$ )  $\delta$  9.58 (s, 1H), 7.35 (d,  $J = 7.9$  Hz, 1H), 7.30 – 7.22 (m, 2H), 7.20 – 7.14 (m, 1H), 1.58 (s, 6H).

$^{13}\text{C NMR}$  (151 MHz,  $\text{CDCl}_3$ )  $\delta$  151.0, 144.0, 127.6, 126.6, 126.2, 123.4, 73.9, 45.6 (hept,  $J = 21.0$  Hz), 32.6.

**HRMS (ESI):** calcd. for  $\text{C}_{11}\text{H}_{11}\text{D}_6\text{NO}$  ( $[\text{M}+\text{H}]^+$ ): 186.1760, found: 186.1758.

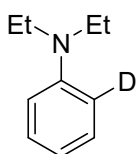

### N,N-diethylaniline-2-d (4a')

Colorless oil.

$^1\text{H NMR}$  (600 MHz,  $\text{CDCl}_3$ )  $\delta$  7.2 (t,  $J = 6.3$  Hz, 2H), 6.7 (d,  $J = 8.5$  Hz, 1H), 6.6 (t,  $J = 7.3$  Hz, 1H), 3.4 (q,  $J = 7.0$  Hz, 4H), 1.2 (t,  $J = 6.9$  Hz, 6H).

$^{13}\text{C NMR}$  (101 MHz,  $\text{CDCl}_3$ )  $\delta$  147.7, 129.2, 129.1, 115.3, 111.8, 111.4 (t,  $J = 22.8$  Hz), 44.3, 12.6.

**HRMS (ESI):** calcd. for  $\text{C}_{10}\text{H}_{14}\text{DN}$  ( $[\text{M}+\text{H}]^+$ ): 152.1374, found: 152.1377.

## 5. GC-MS data of CO gas

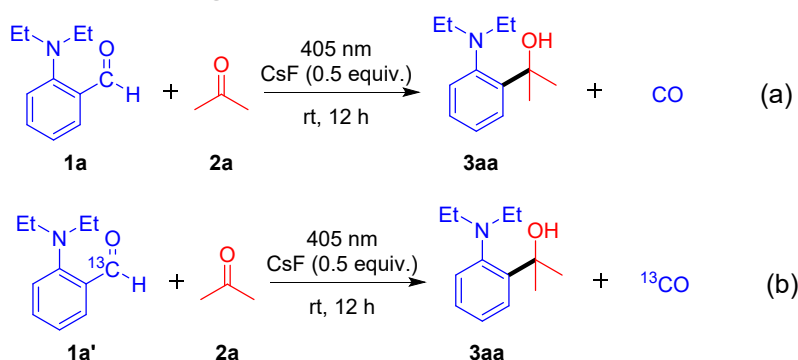

Scheme S1 Analysis of the reaction atmosphere by GC-MS

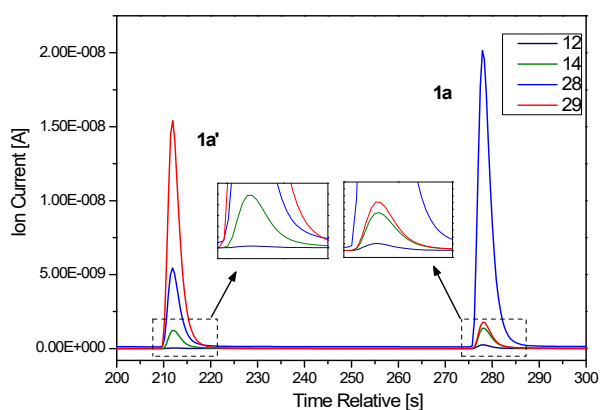

Figure S1 GC-MS analysis of the gas phase mixture of **1a'** and **1a**

It can be seen from Figure S1 that the intensity of the signal peak with mass-to-charge ratio ( $m/e$ ) of 29 in the gas phase component of **1a'** (Scheme S1-b) was significantly higher than that of the system of **1a** (Scheme S1-a), which indicated that the  $^{13}\text{C}$  isotope labelled carbon monoxide is formed in **1a'** system.

## 6. Emission spectra of blue LED

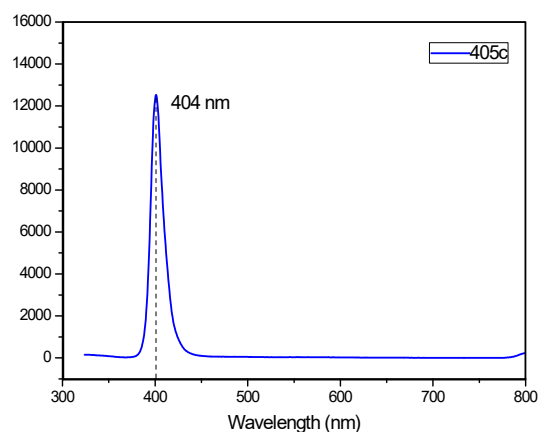

**Figure S2** Emission spectra of blue LED

## 7. UV-vis absorption spectra

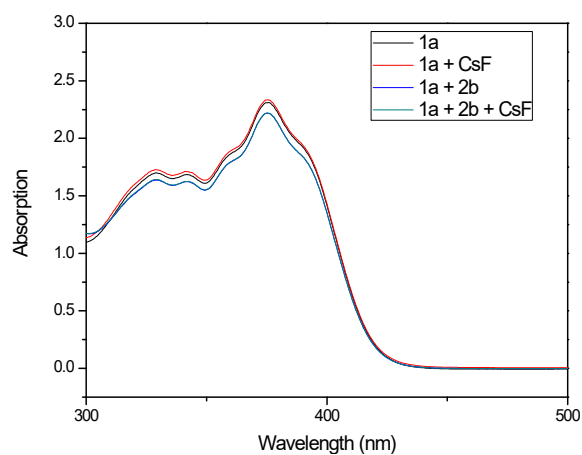

**Figure S3** UV-vis absorption spectra

The UV-vis absorption spectra were recorded in toluene with the combination of **1a**, **2b** and CsF. [**1a**] = 1.0 M: 1.77 mg dissolved in 10 ml toluene; [**1a** + CsF]: solution of 1.77 mg of **1a** and 0.07 mg of CsF in 10 ml toluene; [**1a** + **2b**] : solution of 1.77 mg of **1a** and 6.88 mg of **2b** in 10 ml toluene; [**1a** + **2b** + CsF] : solution of 1.77 mg of **1a** , 6.88 mg of **2b** and 0.07 mg of CsF in 10 ml toluene.

## 8. Stern-Volmer quenching studies with ketone **2b**

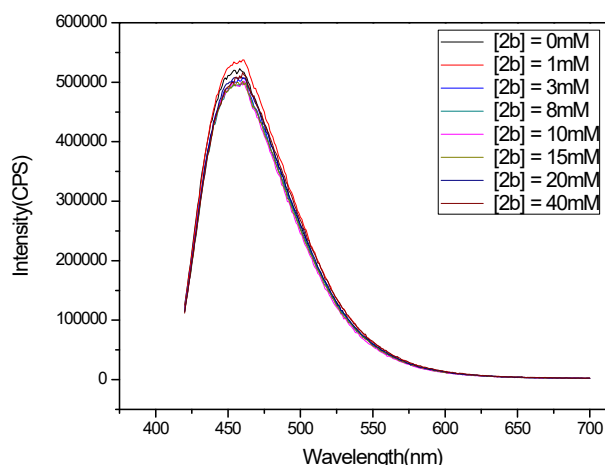

**Figure S4** Quenching of the **1a** in the presence of **2b**

The samples were prepared by mixing compound **1a** ( $[1a] = 10^{-3}$  M) with the different amounts of **2b** in 2 mL toluene in a  $10 \times 10$  mm light path quartz fluorescence cuvette equipped with Silicone/PTFE 3.2 mm septum. The excitation wavelength was fixed at 405 nm (incident light slit regulated to 1 mm), and the emission light was acquired from 400 nm to 700 nm (emission light slit regulated to 5 mm). A solvent blank was acquired from all measurements.

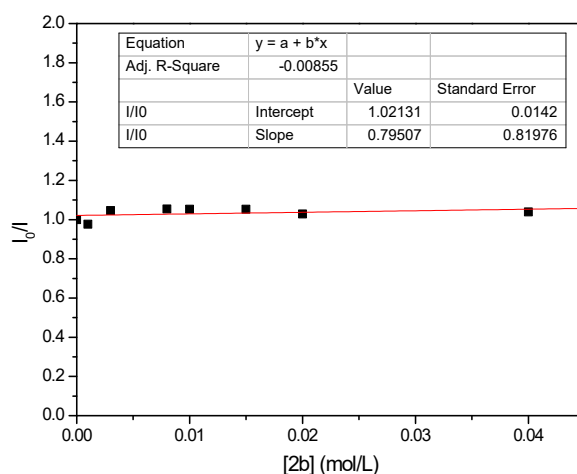

**Figure S5** Stern-Volmer quenching plot

The Stern-Volmer plot shows a linear correlation between the concentration of **2b** and the ratio  $I_0/I$ . The Stern-Volmer constant  $K_{sv}$  could be calculated of  $0.795 \text{ M}^{-1}$ , based on the following Equation S1.

$$I_0/I = 1 + K_{sv}[Q] \quad \text{Eq. S1}$$

## 9. Kinetic isotope experiments

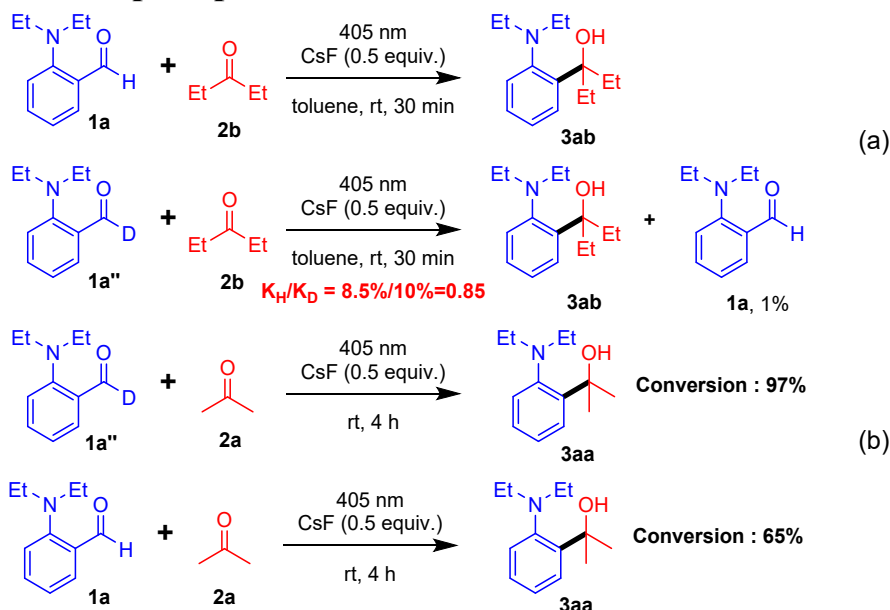

**Scheme S2** Kinetic isotope experiments

The conversion of isotope labelled substrate **1a''** was significantly higher than that of normal substrate **1a** (Scheme S2), which maybe due to the much higher bond energy of C-D bond than C-H bond, thus hindering the vibrational relaxation process of excited state and prolonging the lifetime of single excited state ( $S_1$ )<sup>7</sup>

## 10. Computational details

All the calculations were carried out with Gaussian 16 software package.<sup>8</sup> Geometry optimizations were carried out at CAM-B3LYP<sup>9</sup>/6-311G(d,p)<sup>10</sup>, SDD<sup>11</sup> for Cs/IEFPCM<sup>12</sup>(toluene) level of theory. Vibrational frequencies were also calculated for all stationary points to verify them as energy minima or transition states. Intrinsic reaction coordinate (IRC)<sup>13</sup> calculations were carried out as well to confirm whether the transition states were connected with expected reactants and products. Time-dependent density functional theory (TD-DFT)<sup>14</sup> calculation was also performed at CAM-B3LYP/6-311G(d,p), SDD for Cs/IEFPCM (toluene) level of theory and first 6 excited states were reported. The orbitals were displayed using VMD 1.9.3.<sup>15</sup> The optimized geometries were displayed using CYLview20.<sup>16</sup>

### i. Configuration study

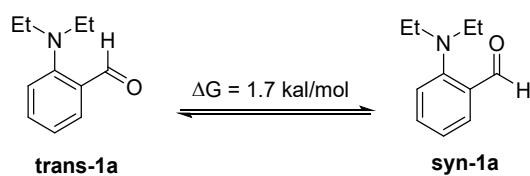

**1a** has two possible conformations, where the Gibbs free energy of **syn-1a** is 1.7 kcal/mol higher than that of **trans-1a**. Thus, **trans-1a** is the more stable conformation and use as the main conformation for the next calculation.

## ii Time-dependent density functional theory calculations

TD-DFT calculations of **1a**. Orbital 48 is HOMO and orbital 49 is LUMO.

Excited State 1: Singlet-A 3.7037 eV 334.76 nm f=0.0326 <S\*\*2>=0.000

|          |         |                                        |
|----------|---------|----------------------------------------|
| 45 -> 49 | 0.12242 |                                        |
| 46 -> 49 | 0.42599 | (n <sub>O</sub> , π*) 36% contribution |
| 46 -> 51 | 0.11102 |                                        |
| 48 -> 49 | 0.51333 | (n <sub>N</sub> , π*) 53% contribution |

Excited State 2: Singlet-A 4.2036 eV 294.95 nm f=0.0782 <S\*\*2>=0.000

|          |          |
|----------|----------|
| 45 -> 49 | -0.10892 |
| 46 -> 49 | -0.46490 |
| 46 -> 51 | -0.10131 |
| 47 -> 49 | -0.10916 |
| 48 -> 49 | 0.46887  |

Excited State 3: Singlet-A 5.0698 eV 244.55 nm f=0.0267 <S\*\*2>=0.000

|          |          |
|----------|----------|
| 45 -> 49 | 0.15919  |
| 47 -> 49 | -0.44822 |
| 47 -> 50 | 0.10534  |
| 48 -> 50 | 0.49328  |

Excited State 4: Singlet-A 5.5426 eV 223.69 nm f=0.5119 <S\*\*2>=0.000

|          |          |
|----------|----------|
| 46 -> 49 | -0.10934 |
| 47 -> 49 | 0.50531  |
| 48 -> 50 | 0.45457  |

Excited State 5: Singlet-A 5.8194 eV 213.05 nm f=0.0159  $\langle S^{*2} \rangle = 0.000$

45 -> 49 0.58074

46 -> 49 -0.16689

47 -> 50 0.26556

48 -> 50 -0.18310

Excited State 6: Singlet-A 6.5345 eV 189.74 nm f=0.1066  $\langle S^{*2} \rangle = 0.000$

45 -> 49 0.21773

46 -> 49 -0.13475

47 -> 50 -0.41334

48 -> 51 0.42619

48 -> 52 -0.21983

Orbital of **1a**, (localized by PM-Mulliken method<sup>16</sup> with Multiwfn 3.7<sup>17</sup>)

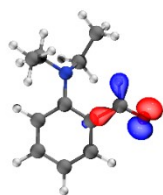

Orbital 46

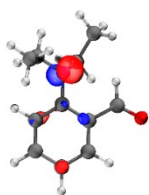

Orbital 48

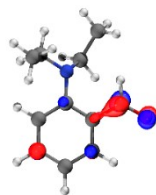

Orbital 49

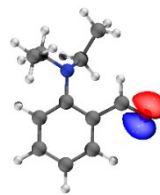

Localized-orbital 46

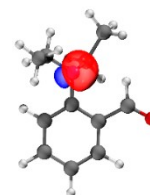

Localized-orbital 48

**Figure S6**

TD-DFT Calculations of **1a-Cs**. Orbital 52 is HOMO and orbital 53 is LUMO.

Excited State 1: Singlet-A 3.5734 eV 346.97 nm f=0.0840  $\langle S^{*2} \rangle = 0.000$

49 -> 53 0.14972 ( $n_O, \pi^*$ ) 4% contribution

50 -> 53 -0.16679

52 -> 53 0.65922 ( $n_N, \pi^*$ ) 87% contribution

Excited State 2: Singlet-A 4.2130 eV 294.29 nm f=0.0342  $\langle S^{*2} \rangle = 0.000$

49 -> 53 -0.39608

49 -> 60 0.12867

50 -> 53 0.49254

50 -> 60 -0.11153

52 -> 53 0.22902

Excited State 3: Singlet-A 4.9578 eV 250.08 nm f=0.0490 <S\*\*2>=0.000

49 -> 53 0.15407

51 -> 53 0.55445

52 -> 58 0.36756

Excited State 4: Singlet-A 5.4238 eV 228.59 nm f=0.4908 <S\*\*2>=0.000

49 -> 53 0.17168

50 -> 53 0.15787

51 -> 53 -0.41752

52 -> 58 0.47914

Excited State 5: Singlet-A 5.5371 eV 223.91 nm f=0.0015 <S\*\*2>=0.000

49 -> 53 0.12684

50 -> 53 0.11469

52 -> 54 0.63385

52 -> 57 0.22531

Excited State 6: Singlet-A 5.5976 eV 221.49 nm f=0.0408 <S\*\*2>=0.000

49 -> 53 0.43653

50 -> 53 0.36385

51 -> 58 -0.17096

52 -> 54 -0.16348

52 -> 58 -0.31865

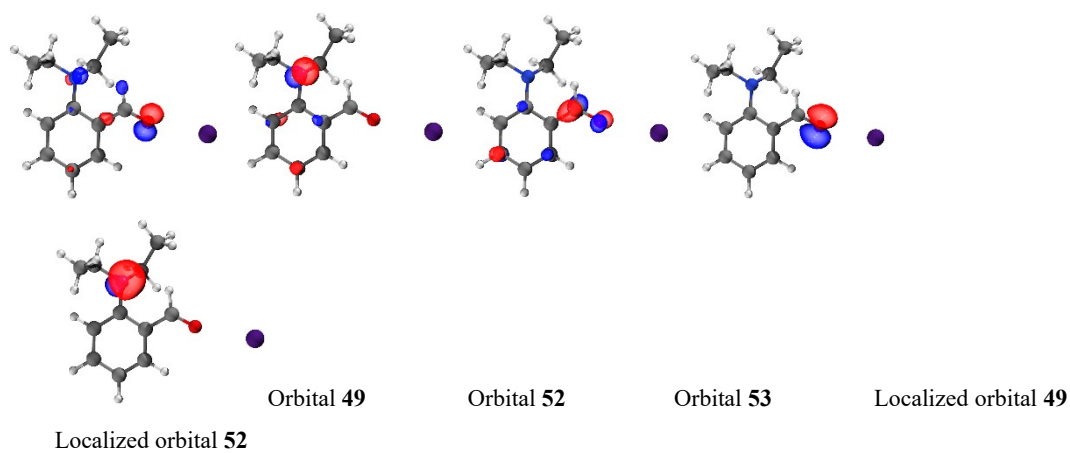

**Figure S7**

TD-DFT Calculations of **1n**. Orbital 48 is HOMO and orbital 49 is LUMO.



---

Excited State 1: Singlet-A 3.9498 eV 313.90 nm f=0.0162 <S\*\*2>=0.000

30 -> 33 0.61830 (n<sub>o</sub>, π\*) 76% contribution

30 -> 36 0.13937

30 -> 37 -0.15007

32 -> 33 -0.25287

Excited State 2: Singlet-A 4.1025 eV 302.22 nm f=0.1317 <S\*\*2>=0.000

30 -> 33 0.23969

31 -> 34 -0.11368

32 -> 33 0.64532

Excited State 3: Singlet-A 5.2623 eV 235.61 nm f=0.1152 <S\*\*2>=0.000

31 -> 33 0.61811

32 -> 34 0.30600

Excited State 4: Singlet-A 5.9383 eV 208.79 nm f=0.5305 <S\*\*2>=0.000

31 -> 33 -0.31506

32 -> 34 0.61213

Excited State 5: Singlet-A 6.4529 eV 192.14 nm f=0.0579 <S\*\*2>=0.000

29 -> 33 0.12390

29 -> 35 0.10969

31 -> 34 0.23941

32 -> 34 0.11341

32 -> 35 0.62117

Excited State 6: Singlet-A 6.5721 eV 188.65 nm f=0.0830 <S\*\*2>=0.000

29 -> 33 0.19148

31 -> 34 0.48472

32 -> 35 -0.26525

32 -> 36 0.21205

32 -> 37 -0.27909

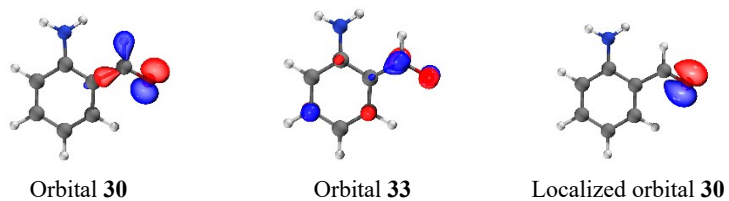

**Figure S8**

TD-DFT Calculations of **1o**. Orbital 48 is HOMO and orbital 49 is LUMO.

Excited State 1: Singlet-A 4.1194 eV 300.98 nm  $f=0.0004$   $\langle S^{*2} \rangle = 0.000$

47 -> 49 0.66603 (n<sub>o</sub>, π\*) 89% contribution

47 -> 52 0.11394

47 -> 54 0.14562

47 -> 55 0.10150

Excited State 2: Singlet-A 4.3911 eV 282.35 nm  $f=0.6913$   $\langle S^{*2} \rangle = 0.000$

48 -> 49 0.68506

48 -> 50 0.10369

Excited State 3: Singlet-A 4.7677 eV 260.05 nm  $f=0.0696$   $\langle S^{*2} \rangle = 0.000$

46 -> 49 -0.29970

48 -> 49 -0.10383

48 -> 50 0.62350

Excited State 4: Singlet-A 5.8062 eV 213.54 nm  $f=0.1841$   $\langle S^{*2} \rangle = 0.000$

46 -> 49 0.62578

48 -> 50 0.30920

Excited State 5: Singlet-A 6.3108 eV 196.46 nm  $f=0.0207$   $\langle S^{*2} \rangle = 0.000$

45 -> 51 0.10168

48 -> 51 0.67026

48 -> 53 -0.13266

Excited State 6: Singlet-A 6.7195 eV 184.51 nm  $f=0.0807$   $\langle S^{*2} \rangle = 0.000$

45 -> 49 0.40374

46 -> 50 0.25301

48 -> 52 -0.38623  
 48 -> 53 0.18317  
 48 -> 54 -0.21441  
 48 -> 55 -0.10921

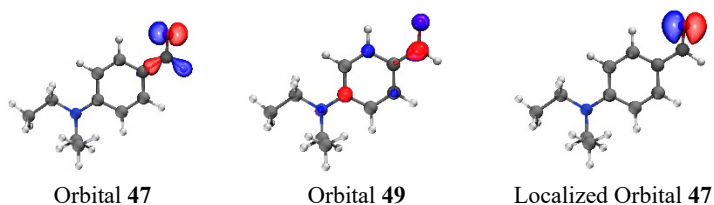

Figure S9

### iii Potential complete energy surface

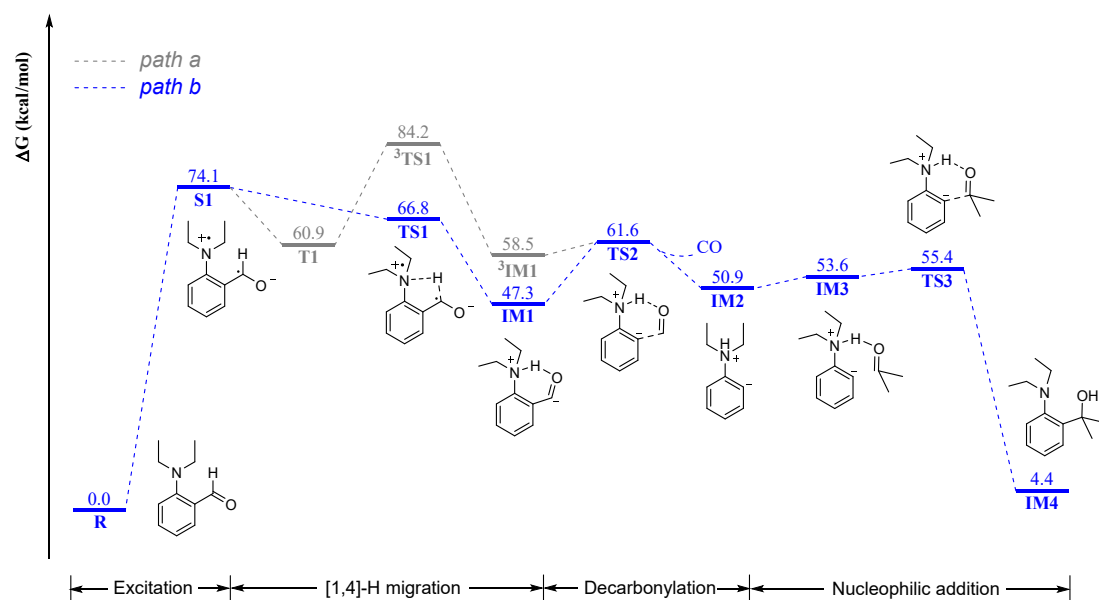

Figure S10 Potential complete energy surface

### iv Cartesian coordinate

#### trans-1a

Charge = 0    Multiplicity = 1

|   |             |             |             |
|---|-------------|-------------|-------------|
| C | 0.73638100  | -1.67813800 | -0.46015600 |
| C | 2.10556000  | -1.87053100 | -0.55143700 |
| C | 2.99131800  | -0.82190600 | -0.33202800 |
| C | 2.48504200  | 0.41549000  | 0.01330800  |
| C | 1.11173400  | 0.61979200  | 0.13789500  |
| C | 0.20714800  | -0.42472800 | -0.13742300 |
| N | -1.18209400 | -0.17454500 | -0.09048600 |
| C | -2.06048800 | -1.31829000 | 0.14452300  |
| C | -1.88014000 | -1.93628900 | 1.52276600  |
| C | -1.69154300 | 0.72904900  | -1.13558800 |

---

|   |             |             |             |
|---|-------------|-------------|-------------|
| C | -2.84019600 | 1.61434000  | -0.67391300 |
| C | 0.64936600  | 1.92062800  | 0.66236200  |
| O | 1.35930000  | 2.89200300  | 0.78772600  |
| H | 0.07625900  | -2.50967900 | -0.66299000 |
| H | 2.48405900  | -2.85209100 | -0.81250500 |
| H | 4.05945400  | -0.97707900 | -0.41594300 |
| H | 3.13851600  | 1.25267300  | 0.22646600  |
| H | -3.08283500 | -0.95023300 | 0.06276700  |
| H | -1.95411600 | -2.08013100 | -0.64241400 |
| H | -2.58750000 | -2.75649200 | 1.66142600  |
| H | -0.87448900 | -2.33286900 | 1.66662700  |
| H | -2.06198700 | -1.18919500 | 2.29721600  |
| H | -0.86716600 | 1.35554800  | -1.47464200 |
| H | -2.00489100 | 0.13779500  | -2.00930000 |
| H | -3.16233400 | 2.25860500  | -1.49483800 |
| H | -3.70669500 | 1.03296300  | -0.35510000 |
| H | -2.53638300 | 2.25037200  | 0.15904300  |
| H | -0.40472500 | 1.94909800  | 0.98390900  |

### **syn-1a**

Charge = 0 Multiplicity = 1

|   |             |             |             |
|---|-------------|-------------|-------------|
| C | -1.20995900 | 1.40903100  | -0.37405300 |
| C | -2.58957200 | 1.32106900  | -0.40645100 |
| C | -3.23398100 | 0.10641700  | -0.21186300 |
| C | -2.45817100 | -1.00192300 | 0.05404100  |
| C | -1.06136900 | -0.94425100 | 0.10925000  |
| C | -0.39611100 | 0.28531400  | -0.15251300 |
| N | 0.99237400  | 0.39122900  | -0.17234400 |
| C | 1.58450400  | 1.72070600  | -0.04548400 |
| C | 1.38513500  | 2.33834000  | 1.33151600  |
| C | 1.73012000  | -0.48252600 | -1.09680400 |
| C | 3.06764100  | -0.96453400 | -0.55674000 |
| C | -0.42760100 | -2.17568900 | 0.60708200  |
| O | 0.74182800  | -2.37815800 | 0.83080200  |
| H | -0.75531000 | 2.37141900  | -0.55419200 |
| H | -3.16778500 | 2.21683300  | -0.60228700 |
| H | -4.31316900 | 0.03524100  | -0.24671700 |
| H | -2.93525100 | -1.95501000 | 0.25687900  |
| H | 2.65321400  | 1.60226100  | -0.21451000 |
| H | 1.23387000  | 2.39874200  | -0.83684500 |
| H | 1.88232600  | 3.30944300  | 1.38271900  |
| H | 0.33151400  | 2.48753400  | 1.56948000  |
| H | 1.81343200  | 1.68901200  | 2.09654100  |

---

|   |             |             |             |
|---|-------------|-------------|-------------|
| H | 1.10821000  | -1.34207900 | -1.32704000 |
| H | 1.87997800  | 0.06032700  | -2.04233100 |
| H | 3.53362000  | -1.63570100 | -1.28229200 |
| H | 3.76541700  | -0.14354700 | -0.38108800 |
| H | 2.91434500  | -1.50688600 | 0.37333500  |
| H | -1.16946600 | -2.97265100 | 0.82045000  |

### 1n

Charge = 0 Multiplicity = 1

|   |             |             |             |
|---|-------------|-------------|-------------|
| C | -0.04843900 | -1.41161700 | 0.02651800  |
| C | 1.29991300  | -1.68794900 | 0.01652200  |
| C | 2.19999300  | -0.62173900 | -0.01560900 |
| C | 1.75480700  | 0.68314000  | -0.02201900 |
| C | 0.38345100  | 0.97897900  | -0.00078300 |
| C | -0.52729400 | -0.09687200 | 0.00556400  |
| H | -0.78571400 | -2.20481800 | 0.03868900  |
| H | 1.65639100  | -2.70963600 | 0.02800100  |
| H | 3.26643300  | -0.81499300 | -0.02882200 |
| H | 2.46772000  | 1.50007400  | -0.03594000 |
| N | -0.02328800 | 2.29856700  | -0.03200100 |
| H | -0.90077000 | 2.53518800  | 0.39957600  |
| H | 0.69630200  | 2.97980800  | 0.15135400  |
| C | -1.98054900 | 0.10793000  | -0.05123000 |
| H | -2.32503700 | 1.15095800  | -0.18489900 |
| O | -2.80045100 | -0.77972200 | 0.01278300  |

### 1o

Charge = 0 Multiplicity = 1

|   |             |             |             |
|---|-------------|-------------|-------------|
| C | 0.31949600  | -0.01574400 | -0.18552000 |
| C | -0.36238700 | 1.19747800  | -0.43225700 |
| C | -1.73760300 | 1.26330200  | -0.37674100 |
| C | -2.50837200 | 0.14590800  | -0.06066000 |
| C | -1.84574500 | -1.05165900 | 0.20979200  |
| C | -0.47367300 | -1.13753900 | 0.15815200  |
| H | 0.18474200  | 2.09660900  | -0.66993900 |
| H | -2.22870500 | 2.20999500  | -0.57916500 |
| H | -2.43646500 | -1.92149200 | 0.47133100  |
| H | -0.01116000 | -2.08301600 | 0.39386100  |
| C | -3.96590400 | 0.23496800  | -0.00235300 |
| H | -4.37581900 | 1.24073600  | -0.23154200 |
| O | -4.71199000 | -0.67967600 | 0.26769800  |
| N | 1.68756300  | -0.11019600 | -0.28196100 |

---

|   |            |             |             |
|---|------------|-------------|-------------|
| C | 2.49588200 | 1.10024800  | -0.37081200 |
| H | 2.05112500 | 1.76678500  | -1.10945600 |
| C | 2.33143200 | -1.36881300 | 0.10465500  |
| H | 2.19259000 | -1.55301100 | 1.17867500  |
| H | 1.82087500 | -2.17807600 | -0.41997100 |
| C | 3.81001500 | -1.46820900 | -0.23418900 |
| H | 4.42497900 | -0.77081500 | 0.33602500  |
| H | 4.14976000 | -2.47628000 | 0.00902600  |
| H | 3.99011300 | -1.30436400 | -1.29828600 |
| H | 3.46569800 | 0.83013500  | -0.78094200 |
| C | 2.68046000 | 1.82210900  | 0.96171600  |
| H | 3.18562500 | 1.17940200  | 1.68613100  |
| H | 3.28700700 | 2.72060700  | 0.82744400  |
| H | 1.72100400 | 2.11927500  | 1.38825700  |

## S1

Charge = 0 Multiplicity = 1

|   |             |             |             |
|---|-------------|-------------|-------------|
| C | 0.95264700  | -1.67369100 | -0.33596500 |
| C | 2.34201000  | -1.71801500 | -0.42092300 |
| C | 3.07635500  | -0.52963100 | -0.31395200 |
| C | 2.45516800  | 0.68306300  | -0.12518300 |
| C | 1.04210400  | 0.74185700  | -0.03081100 |
| C | 0.30453300  | -0.46966500 | -0.14251000 |
| N | -1.11318100 | -0.35271300 | -0.07158800 |
| C | -1.77446900 | -1.01392600 | 1.05187700  |
| C | -1.26094600 | -0.54911100 | 2.40395400  |
| C | -1.81143700 | -0.39457300 | -1.36123900 |
| C | -3.11753900 | 0.38536900  | -1.38513900 |
| C | 0.26610200  | 1.90668400  | 0.16694400  |
| O | 0.59023800  | 3.09643000  | 0.30553300  |
| H | 0.37115500  | -2.58500900 | -0.42438900 |
| H | 2.84600600  | -2.66410500 | -0.56741700 |
| H | 4.15820300  | -0.56557800 | -0.37597400 |
| H | 3.03133400  | 1.59460600  | -0.03730100 |
| H | -2.84405000 | -0.82268600 | 0.97134200  |
| H | -1.63494500 | -2.09968200 | 0.94925800  |
| H | -1.77533100 | -1.09583000 | 3.19571200  |
| H | -0.19072600 | -0.72903800 | 2.50556900  |
| H | -1.44522900 | 0.51661000  | 2.54532500  |
| H | -1.12355600 | 0.01644200  | -2.09908200 |
| H | -1.98811700 | -1.44462100 | -1.63311000 |
| H | -3.53165700 | 0.35737100  | -2.39426800 |
| H | -3.86889500 | -0.02832900 | -0.71202000 |

---

|   |             |            |             |
|---|-------------|------------|-------------|
| H | -2.94793800 | 1.42961100 | -1.11728900 |
| H | -0.83307000 | 1.60762100 | 0.20818300  |

### T1

Charge = 0 Multiplicity = 3

|   |             |             |             |
|---|-------------|-------------|-------------|
| C | 0.68220700  | -1.79705700 | -0.23990000 |
| C | 2.03197100  | -2.05996100 | -0.25879700 |
| C | 2.95264800  | -0.95690300 | -0.25458600 |
| C | 2.52836400  | 0.32735800  | -0.13643700 |
| C | 1.14338900  | 0.63175200  | 0.04985600  |
| C | 0.18447500  | -0.48497000 | -0.17952400 |
| N | -1.15853900 | -0.21426200 | -0.27950800 |
| C | -2.13764900 | -1.28551900 | -0.08872000 |
| C | -2.22811000 | -1.75129600 | 1.35799500  |
| C | -1.63544600 | 0.93421400  | -1.06491200 |
| C | -2.73574500 | 1.73794800  | -0.38872600 |
| C | 0.78785900  | 1.90567400  | 0.57459100  |
| O | 1.61416700  | 2.82338100  | 0.74927300  |
| H | -0.00802100 | -2.62176900 | -0.35120400 |
| H | 2.39576800  | -3.07348000 | -0.35072600 |
| H | 4.01498500  | -1.16111000 | -0.33271900 |
| H | 3.22543600  | 1.15113200  | -0.07097200 |
| H | -3.10259900 | -0.89966000 | -0.41033900 |
| H | -1.90658200 | -2.12068500 | -0.75707100 |
| H | -2.97923900 | -2.53840300 | 1.44494900  |
| H | -1.27667000 | -2.14615200 | 1.71364200  |
| H | -2.51834200 | -0.92469700 | 2.00814300  |
| H | -0.78329200 | 1.56908800  | -1.29202900 |
| H | -1.99107200 | 0.53830900  | -2.02349900 |
| H | -3.03105400 | 2.56011200  | -1.04269400 |
| H | -3.62649000 | 1.14059900  | -0.18960400 |
| H | -2.39360000 | 2.16299000  | 0.55524900  |
| H | -0.26657300 | 2.06907900  | 0.83620500  |

### TS1

Charge = 0 Multiplicity = 1

Imaginary frequency = -205.78 cm<sup>-1</sup>

|   |            |             |             |
|---|------------|-------------|-------------|
| C | 1.13962900 | -1.29107700 | -0.74455000 |
| C | 2.51668100 | -1.19163900 | -0.86534500 |
| C | 3.17340200 | -0.06586800 | -0.36823200 |
| C | 2.46597200 | 0.94759900  | 0.25232000  |

---

|   |             |             |             |
|---|-------------|-------------|-------------|
| C | 1.07540800  | 0.88489900  | 0.36976900  |
| C | 0.45572100  | -0.25120000 | -0.13573700 |
| N | -1.02411400 | -0.25714200 | -0.00812500 |
| C | -1.62555600 | -1.57277800 | 0.38186600  |
| C | -1.06716600 | -2.08749300 | 1.69445300  |
| C | -1.66314900 | 0.38621700  | -1.21694900 |
| C | -3.14253900 | 0.66144800  | -1.03653700 |
| H | 0.62571500  | -2.16398700 | -1.12884900 |
| H | 3.07529900  | -1.98818700 | -1.33979200 |
| H | 4.25013100  | 0.01158000  | -0.46819100 |
| H | 2.98325500  | 1.81029100  | 0.65925900  |
| C | 0.24067400  | 1.86230600  | 1.21624400  |
| H | -1.20058300 | 0.39932300  | 0.77214700  |
| H | -1.45806500 | -2.26744000 | -0.44021700 |
| H | -2.69733800 | -1.40783400 | 0.46491700  |
| H | -1.60993100 | -2.98942500 | 1.97937700  |
| H | -1.19411400 | -1.35117700 | 2.49036100  |
| H | -0.00877800 | -2.33141400 | 1.62074900  |
| H | -1.45534800 | -0.26681200 | -2.06473100 |
| H | -1.12058000 | 1.32233000  | -1.33439200 |
| H | -3.48224100 | 1.25825300  | -1.88379700 |
| H | -3.32190700 | 1.24952800  | -0.13403800 |
| H | -3.75175300 | -0.24175700 | -1.00620400 |
| O | -0.48492800 | 2.63278100  | 0.57330800  |

### **<sup>3</sup>TS1**

Charge = 0 Multiplicity = 3

Imaginary frequency = -406.10 cm<sup>-1</sup>

|   |             |             |             |
|---|-------------|-------------|-------------|
| C | 1.28820600  | -1.25317400 | -0.78564200 |
| C | 2.65836100  | -1.02479000 | -0.80988900 |
| C | 3.17399300  | 0.13912100  | -0.24567800 |
| C | 2.34205700  | 1.08011000  | 0.33862600  |
| C | 0.95164100  | 0.89190400  | 0.37708100  |
| C | 0.47715500  | -0.30211400 | -0.20194900 |
| N | -0.97941600 | -0.41610500 | -0.10855800 |
| C | -1.49684400 | -1.72677900 | 0.37793000  |
| C | -1.01294200 | -2.04851100 | 1.77864500  |
| C | -1.69046500 | 0.08815300  | -1.33537900 |
| C | -3.01091200 | 0.74572800  | -0.98415800 |
| H | 0.87724700  | -2.15687600 | -1.22094900 |
| H | 3.31880400  | -1.75320500 | -1.26280900 |
| H | 4.24373500  | 0.31264900  | -0.26587200 |
| H | 2.75258400  | 1.97967600  | 0.77978700  |



---

|   |             |             |             |
|---|-------------|-------------|-------------|
| C | -0.00967700 | 1.77517100  | 1.02850700  |
| H | -1.11672500 | 0.34870200  | 0.65060600  |
| H | -1.19406900 | -2.49076200 | -0.33964300 |
| H | -2.58378600 | -1.66056300 | 0.35239100  |
| H | -1.45218800 | -2.99344100 | 2.10039400  |
| H | -1.31475900 | -1.27449000 | 2.48600100  |
| H | 0.07168900  | -2.14539200 | 1.81719200  |
| H | -1.80264700 | -0.75694100 | -2.01695300 |
| H | -1.02423500 | 0.81572600  | -1.79274400 |
| H | -3.48396000 | 1.10502000  | -1.89894600 |
| H | -2.82433300 | 1.60366000  | -0.33537700 |
| H | -3.70789000 | 0.06112400  | -0.49814900 |
| O | -0.74087500 | 2.71611700  | 0.62205200  |

## IM1

Charge = 0 Multiplicity = 1

|   |             |             |             |
|---|-------------|-------------|-------------|
| C | 1.08594300  | -1.48550200 | -0.22996900 |
| C | 2.47198900  | -1.50421200 | -0.32730600 |
| C | 3.19129700  | -0.31815600 | -0.30761600 |
| C | 2.51342000  | 0.88441700  | -0.18944700 |
| C | 1.12271200  | 0.93157500  | -0.08837400 |
| C | 0.41117300  | -0.27892600 | -0.11159300 |
| N | -1.03811400 | -0.23436700 | -0.03038900 |
| C | -1.57999100 | -0.97550800 | 1.12354400  |
| C | -1.11014300 | -0.40857700 | 2.45303900  |
| C | -1.66346400 | -0.62239400 | -1.31330100 |
| C | -3.09101500 | -0.11752100 | -1.45905300 |
| H | 0.53359200  | -2.41730500 | -0.24909500 |
| H | 2.98860200  | -2.45215600 | -0.42059700 |
| H | 4.27148700  | -0.33365200 | -0.38360400 |
| H | 3.04194100  | 1.83000200  | -0.16772900 |
| C | 0.55779900  | 2.32075900  | 0.04806900  |
| H | -1.11291200 | 1.39305500  | 0.13280800  |
| H | -1.32124900 | -2.04034900 | 1.04954800  |
| H | -2.66631000 | -0.90934200 | 1.06718100  |
| H | -1.56679700 | -0.96461900 | 3.27347200  |
| H | -1.39379000 | 0.64051400  | 2.55377600  |
| H | -0.02703700 | -0.48007200 | 2.56153000  |
| H | -1.62811800 | -1.71332500 | -1.43619400 |
| H | -1.04982800 | -0.19374500 | -2.10679200 |
| H | -3.46556100 | -0.36951700 | -2.45290300 |
| H | -3.13225800 | 0.96766000  | -1.34804800 |
| H | -3.77037500 | -0.56414200 | -0.73215700 |

---

O -0.73661400 2.33647800 0.16044500

### **<sup>3</sup>IM1**

Charge = 0 Multiplicity = 3

C 1.12151300 -1.49805400 -0.03665300  
C 2.50997100 -1.52807000 -0.12757900  
C 3.20882200 -0.31131400 -0.26681100  
C 2.55127500 0.88802100 -0.31116300  
C 1.12696800 0.96488000 -0.21562100  
C 0.45330600 -0.29488900 -0.07728600  
N -1.02085800 -0.24472500 -0.01091000  
C -1.57987900 -0.75731500 1.28263400  
C -1.08158700 0.05196200 2.46388100  
C -1.66483100 -0.85527700 -1.22355700  
C -3.10490100 -0.41531200 -1.41301700  
H 0.57046900 -2.42721400 0.06502700  
H 3.03894700 -2.47085900 -0.09406000  
H 4.29039600 -0.32639200 -0.34052200  
H 3.10111400 1.81543500 -0.41745500  
C 0.41785100 2.17253200 -0.24681100  
H -1.22636300 0.79176200 -0.04865600  
H -1.30094700 -1.80801400 1.36368600  
H -2.66449200 -0.69625000 1.20722600  
H -1.55605600 -0.31528300 3.37463500  
H -1.33169100 1.10737100 2.34574100  
H -0.00162800 -0.03513100 2.57795600  
H -1.57363100 -1.93806400 -1.13263700  
H -1.05547600 -0.53704200 -2.06755300  
H -3.46350900 -0.79538200 -2.37042800  
H -3.17858900 0.67355900 -1.43847800  
H -3.77182500 -0.79602600 -0.63956000  
O -0.81022000 2.37095100 -0.15958200

### **TS2**

Charge = 0 Multiplicity = 1

Imaginary frequency = -116.66 cm<sup>-1</sup>

C 1.33763300 -1.45921000 -0.09421000  
C 2.71383300 -1.32271700 -0.18897400  
C 3.27131600 -0.04902400 -0.29225100  
C 2.45481400 1.07547800 -0.30228900  
C 1.05974400 0.99447300 -0.21296600  
C 0.58230600 -0.29176700 -0.10765400

---

|   |             |             |             |
|---|-------------|-------------|-------------|
| N | -0.91865500 | -0.39601600 | -0.03248400 |
| C | -1.42322300 | -1.08453900 | 1.19835600  |
| C | -0.99933500 | -0.36289600 | 2.46245800  |
| C | -1.50053600 | -0.94311300 | -1.30310800 |
| C | -2.98225600 | -0.65369600 | -1.45779900 |
| H | 0.89291100  | -2.44635100 | -0.01463800 |
| H | 3.34723300  | -2.20173200 | -0.18225100 |
| H | 4.34958300  | 0.05508300  | -0.36469800 |
| H | 2.92511700  | 2.05497800  | -0.38167000 |
| C | -0.26683900 | 2.89069400  | -0.06039700 |
| H | -1.20846500 | 0.58957100  | 0.02666400  |
| H | -1.04582700 | -2.10646700 | 1.17075600  |
| H | -2.50906500 | -1.12148800 | 1.12553400  |
| H | -1.42483400 | -0.87727900 | 3.32499500  |
| H | -1.36281900 | 0.66624100  | 2.46774700  |
| H | 0.08418500  | -0.34478600 | 2.56873000  |
| H | -1.28585700 | -2.01172500 | -1.32077900 |
| H | -0.93280200 | -0.47302700 | -2.10415400 |
| H | -3.29650400 | -0.96444100 | -2.45490900 |
| H | -3.18455200 | 0.41540500  | -1.36549600 |
| H | -3.59935600 | -1.19153000 | -0.73813100 |
| O | -1.35038800 | 2.49594600  | 0.07783600  |

## IM2

Charge = 0 Multiplicity = 1

|   |             |             |             |
|---|-------------|-------------|-------------|
| C | 1.04388800  | -0.12107600 | 1.16090100  |
| C | 2.42587400  | -0.21691800 | 1.20402500  |
| C | 3.13493500  | -0.30390100 | 0.00665700  |
| C | 2.46694200  | -0.29645100 | -1.21320600 |
| C | 1.06427300  | -0.20009200 | -1.33291700 |
| C | 0.45454000  | -0.11562000 | -0.09750200 |
| N | -1.04550300 | -0.02804900 | -0.20259400 |
| C | -1.64339000 | 1.20726500  | 0.38946000  |
| C | -1.07272300 | 2.47083600  | -0.22408900 |
| C | -1.71018900 | -1.29402300 | 0.24194900  |
| C | -3.16149200 | -1.40995800 | -0.18687700 |
| H | 0.47109600  | -0.05360000 | 2.08144100  |
| H | 2.94343400  | -0.22445100 | 2.15605600  |
| H | 4.21830400  | -0.37765900 | 0.03583400  |
| H | 3.07519600  | -0.36790600 | -2.11411200 |
| H | -1.10245200 | 0.01994400  | -1.23331700 |
| H | -1.45842400 | 1.16471900  | 1.46331300  |
| H | -2.71944500 | 1.15866400  | 0.23011100  |
| H | -1.56363300 | 3.33545800  | 0.22486000  |

---

|   |             |             |             |
|---|-------------|-------------|-------------|
| H | -1.24802600 | 2.50085900  | -1.30098600 |
| H | -0.00054300 | 2.54912300  | -0.05366100 |
| H | -1.59972300 | -1.34900700 | 1.32515800  |
| H | -1.11409900 | -2.09281200 | -0.19654500 |
| H | -3.51646100 | -2.41355700 | 0.05092700  |
| H | -3.26733000 | -1.27081300 | -1.26500100 |
| H | -3.81531700 | -0.70299000 | 0.32368200  |

### IM3

Charge = 0 Multiplicity = 1

|   |             |             |             |
|---|-------------|-------------|-------------|
| C | 2.58433100  | -0.35031000 | -0.00779900 |
| C | 3.50823500  | 0.67717100  | -0.10861100 |
| C | 3.04964800  | 1.97684400  | -0.31028100 |
| C | 1.68657100  | 2.23232200  | -0.41074300 |
| C | 0.68934100  | 1.23789700  | -0.31570200 |
| C | 1.23791000  | -0.01569400 | -0.11067300 |
| N | 0.23149400  | -1.13290600 | -0.02425000 |
| C | 0.29307000  | -1.93285200 | 1.23773700  |
| C | 0.06001800  | -1.07268700 | 2.46401000  |
| C | 0.23893600  | -1.97561300 | -1.26388700 |
| C | -0.97975000 | -2.87264800 | -1.39449400 |
| H | 2.92423000  | -1.37034100 | 0.14597700  |
| H | 4.56875600  | 0.46766500  | -0.03243100 |
| H | 3.76650000  | 2.78910600  | -0.38976900 |
| H | 1.38934200  | 3.26831000  | -0.57211900 |
| H | -0.66138200 | -0.61729100 | -0.01860200 |
| H | 1.26682600  | -2.42188700 | 1.26361100  |
| H | -0.47306400 | -2.70302600 | 1.16815500  |
| H | 0.09017700  | -1.70415600 | 3.35326600  |
| H | -0.92048900 | -0.59777200 | 2.41197700  |
| H | 0.81915900  | -0.29800900 | 2.56035000  |
| H | 1.17034900  | -2.54265800 | -1.26323100 |
| H | 0.28228400  | -1.26360600 | -2.08669200 |
| H | -0.99803500 | -3.29456400 | -2.40037800 |
| H | -1.89700900 | -2.30022300 | -1.24681100 |
| H | -0.97005200 | -3.70551500 | -0.69112400 |
| O | -2.57930600 | -0.20431200 | 0.24811700  |
| C | -2.72099900 | 0.98297600  | 0.00994100  |
| C | -2.74925700 | 1.49505700  | -1.39677400 |
| H | -3.05010300 | 0.70676200  | -2.08532600 |
| H | -3.38157700 | 2.37516500  | -1.51365100 |
| H | -1.70747500 | 1.77264300  | -1.60362700 |
| C | -2.74283600 | 1.99523200  | 1.11534800  |

---

|   |             |            |            |
|---|-------------|------------|------------|
| H | -1.73322100 | 2.42015000 | 1.14253700 |
| H | -3.44989600 | 2.80315800 | 0.92495300 |
| H | -2.95262400 | 1.51475900 | 2.06930300 |

### TS3

Charge = 0 Multiplicity = 1

Imaginary frequency = -72.53 cm<sup>-1</sup>

|   |             |             |             |
|---|-------------|-------------|-------------|
| C | -2.48411500 | 0.30274600  | -0.08439600 |
| C | -3.34090800 | -0.78042400 | -0.19729100 |
| C | -2.79981400 | -2.05547100 | -0.34498300 |
| C | -1.42102300 | -2.23192500 | -0.38143700 |
| C | -0.49224100 | -1.17708200 | -0.27400500 |
| C | -1.11707800 | 0.04713900  | -0.12227100 |
| N | -0.17815900 | 1.22200000  | -0.03223200 |
| C | -0.35998900 | 2.07787400  | 1.17988100  |
| C | -0.12495600 | 1.29629700  | 2.45791600  |
| C | -0.15176300 | 2.00050600  | -1.31204400 |
| C | 1.06074000  | 2.90634100  | -1.43699700 |
| H | -2.88950900 | 1.30379500  | 0.02801400  |
| H | -4.41415400 | -0.63260400 | -0.17117500 |
| H | -3.46453100 | -2.91011300 | -0.43276300 |
| H | -1.05651300 | -3.25269000 | -0.50145100 |
| H | 0.74594700  | 0.76663900  | 0.05454300  |
| H | -1.36521200 | 2.49682200  | 1.13783600  |
| H | 0.35178400  | 2.89851800  | 1.10463400  |
| H | -0.22592700 | 1.96677900  | 3.31256500  |
| H | 0.88189200  | 0.87640400  | 2.46408400  |
| H | -0.84190900 | 0.48353000  | 2.56626100  |
| H | -1.09039600 | 2.55209900  | -1.37782000 |
| H | -0.14974800 | 1.24879800  | -2.09966900 |
| H | 1.10400300  | 3.29901800  | -2.45385400 |
| H | 1.97813600  | 2.34556600  | -1.24906900 |
| H | 1.02592800  | 3.75892500  | -0.75847300 |
| O | 2.42532000  | 0.11605700  | 0.32234500  |
| C | 2.36393800  | -1.08243200 | 0.07474700  |
| C | 2.63136900  | -1.60856300 | -1.30819000 |
| H | 2.56446700  | -0.80329200 | -2.03690500 |
| H | 3.64669300  | -2.02190500 | -1.32823500 |
| H | 1.92950800  | -2.39974600 | -1.56134600 |
| C | 2.28068600  | -2.09788000 | 1.18020200  |
| H | 1.71061000  | -2.97209300 | 0.87349300  |
| H | 3.30186000  | -2.41556200 | 1.42325300  |
| H | 1.83254600  | -1.65409700 | 2.06614800  |

---

## IM4

Charge = 0 Multiplicity = 1

|   |             |             |             |
|---|-------------|-------------|-------------|
| C | 0.01379500  | 2.15431000  | -0.35261100 |
| C | -1.19371200 | 2.81243100  | -0.50319000 |
| C | -2.37021200 | 2.08245600  | -0.43925400 |
| C | -2.32047200 | 0.71529700  | -0.22404100 |
| C | -1.11487900 | 0.02863600  | -0.06107400 |
| C | 0.06882500  | 0.77863400  | -0.13620400 |
| N | 1.36241800  | 0.13398400  | -0.01315800 |
| C | 2.19573000  | 0.68394000  | 1.06887500  |
| C | 1.53205500  | 0.59490800  | 2.43421800  |
| C | 2.07608300  | 0.08106900  | -1.30097100 |
| C | 3.11351100  | -1.03076500 | -1.36310800 |
| H | 0.93880800  | 2.71595400  | -0.40648300 |
| H | -1.21491200 | 3.88245400  | -0.67105000 |
| H | -3.32843200 | 2.57476300  | -0.55464700 |
| H | -3.25201600 | 0.16747800  | -0.17814500 |
| H | 0.73170800  | -1.40858400 | 0.58114500  |
| H | 2.47773800  | 1.72547800  | 0.85371000  |
| H | 3.12201400  | 0.10832300  | 1.08303500  |
| H | 2.22757100  | 0.93394400  | 3.20428400  |
| H | 1.23379100  | -0.42969000 | 2.65770300  |
| H | 0.64024700  | 1.22104100  | 2.48632100  |
| H | 2.54708100  | 1.05132900  | -1.51962200 |
| H | 1.32879100  | -0.08316800 | -2.07830400 |
| H | 3.55688700  | -1.06678800 | -2.36038700 |
| H | 2.65230400  | -1.99882200 | -1.15820600 |
| H | 3.92568900  | -0.88237700 | -0.65022300 |
| O | -0.02558500 | -1.95464100 | 0.87920200  |
| C | -1.13702200 | -1.50059100 | 0.12061000  |
| C | -1.11342000 | -2.16482900 | -1.26409300 |
| H | -0.20190700 | -1.89787600 | -1.80217900 |
| H | -1.13219400 | -3.24974100 | -1.14259900 |
| H | -1.96953400 | -1.86091300 | -1.87079400 |
| C | -2.36023100 | -1.97822300 | 0.90051800  |
| H | -3.28906000 | -1.87132900 | 0.33975500  |
| H | -2.21870600 | -3.03668600 | 1.12244700  |
| H | -2.44842200 | -1.43917900 | 1.84468200  |

## 11. Notes and references

[1] L. Josa-Culleré, M. G. Hirst, J. P. Lockett, A. L. Thompson, M. G. Moloney, *J. Org. Chem.* **2019**,

---

84, 9671-9683.

- [2] A. Gao, Y. Mu, J. Zhang, W. Yao, *Eur. J. Inorg. Chem.* **2009**, 2009, 3613-3621.
- [3] H.-X. Sun, Z.-H. Sun, B. Wang, *Tetrahedron Lett.* **2009**, 50, 1596-1599.
- [4] J. Niu, P. Guo, J. Kang, Z. Li, J. Xu, S. Hu, *J. Org. Chem.* **2009**, 74, 5075-5078.
- [5] T. Okauchi, K. Kuramoto, M. Kitamura, *Synlett* **2010**, 2010, 2891-2894.
- [6] G. Yan, C. Kuang, Y. Zhang and J. Wang, *Org. Lett.*, **2010**, 12, 1052.
- [7] R. G. Miller, E. K. C. Lee, *Chem. Phys. Lett.* **1976**, 41, 52-54.
- [8] M. J. Frisch, G. W. Trucks, H. B. Schlegel, G. E. Scuseria, M. A. Robb, J. R. Cheeseman, G. Scalmani, V. Barone, G. A. Petersson, H. Nakatsuji, X. Li, M. Caricato, A. V. Marenich, J. Bloino, B. G. Janesko, R. Gomperts, B. Mennucci, H. P. Hratchian, J. V. Ortiz, A. F. Izmaylov, J. L. Sonnenberg, D. Williams-Young, F. Ding, F. Lipparini, F. Egidi, J. Goings, B. Peng, A. Petrone, T. Henderson, D. Ranasinghe, V. G. Zakrzewski, J. Gao, N. Rega, G. Zheng, W. Liang, M. Hada, M. Ehara, K. Toyota, R. Fukuda, J. Hasegawa, M. Ishida, T. Nakajima, Y. Honda, O. Kitao, H. Nakai, T. Vreven, K. Throssell, J. A. Montgomery, Jr., J. E. Peralta, F. Ogliaro, M. J. Bearpark, J. J. Heyd, E. N. Brothers, K. N. Kudin, V. N. Staroverov, T. A. Keith, R. Kobayashi, J. Normand, K. Raghavachari, A. P. Rendell, J. C. Burant, S. S. Iyengar, J. Tomasi, M. Cossi, J. M. Millam, M. Klene, C. Adamo, R. Cammi, J. W. Ochterski, R. L. Martin, K. Morokuma, O. Farkas, J. B. Foresman, and D. J. Fox, Gaussian 16, Revision A.03, Gaussian, Inc., Wallingford CT, 2016.
- [9] T. Yanai, D. Tew, and N. Handy, *Chem. Phys. Lett.* **2004**, 393, 51-57.
- [10] a) A. D. Becke, *J. Chem. Phys.* **1993**, 98, 5648; b) C. Lee, W. Yang, R. G. Parr, *Phys. Rev. B*, **1988**, 37, 785; c) V. A. Rassolov, M. A. Ratner, J. A. Pople, P. C. Redfern, L. A. Curtiss, *J. Comp. Chem.* **2001**, 22, 976.
- [11] L. von Szentpály, P. Fuentealba, H. Preuss and H. Stoll, *Chem. Phys. Lett.* **1982**, 93, 555.
- [12] J. Tomasi, B. Mennucci and R. Cammi, *Chem. Rev.*, **2005**, 105, 2999.
- [13] K. Fukui, *Acc. Chem. Res.*, **1981**, 14, 363-368. (b) C. Gonzalez and B. Schlegel, *J. Chem. Phys.*, **1989**, 90, 2154.
- [14] C. Adamo and D. Jacquemin, *Chem. Soc. Rev.* **2013**, 42, 845.
- [15] W. Humphrey, A. Dalke and K. Schulten, *J. Mol. Graphics*, **1996**, 14, 33.
- [16] CYLview20; Legault, C. Y., Université de Sherbrooke, 2020 (<http://www.cylview.org>)
- [17] J. Pipek and P. G. Mezey, *J. Chem. Phys.* **1989**, 90, 4916.
- [18] Tian Lu, Feiwu Chen, *J. Comput. Chem.* **2012**, 33, 580-592.

## 12. Copies of $^1\text{H}$ , $^{13}\text{C}$ and $^{19}\text{F}$ NMR spectra.

$^1\text{H}$  and  $^{13}\text{C}$  NMR spectra of compound **1c**

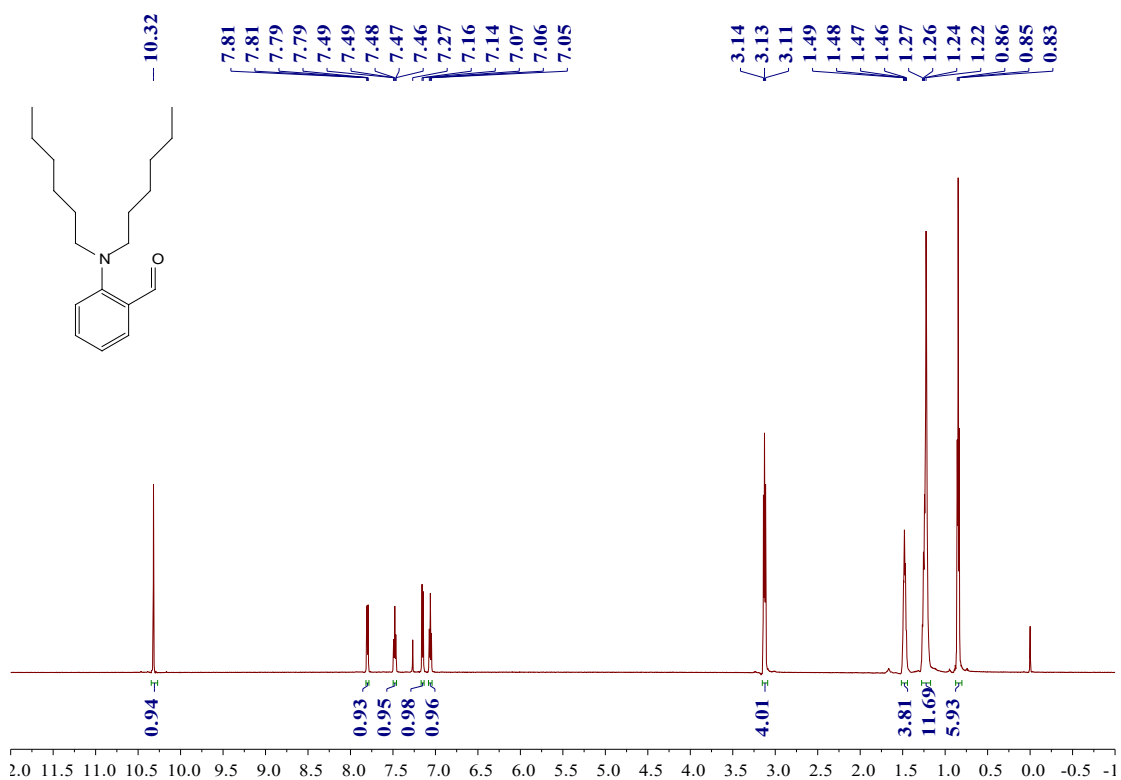



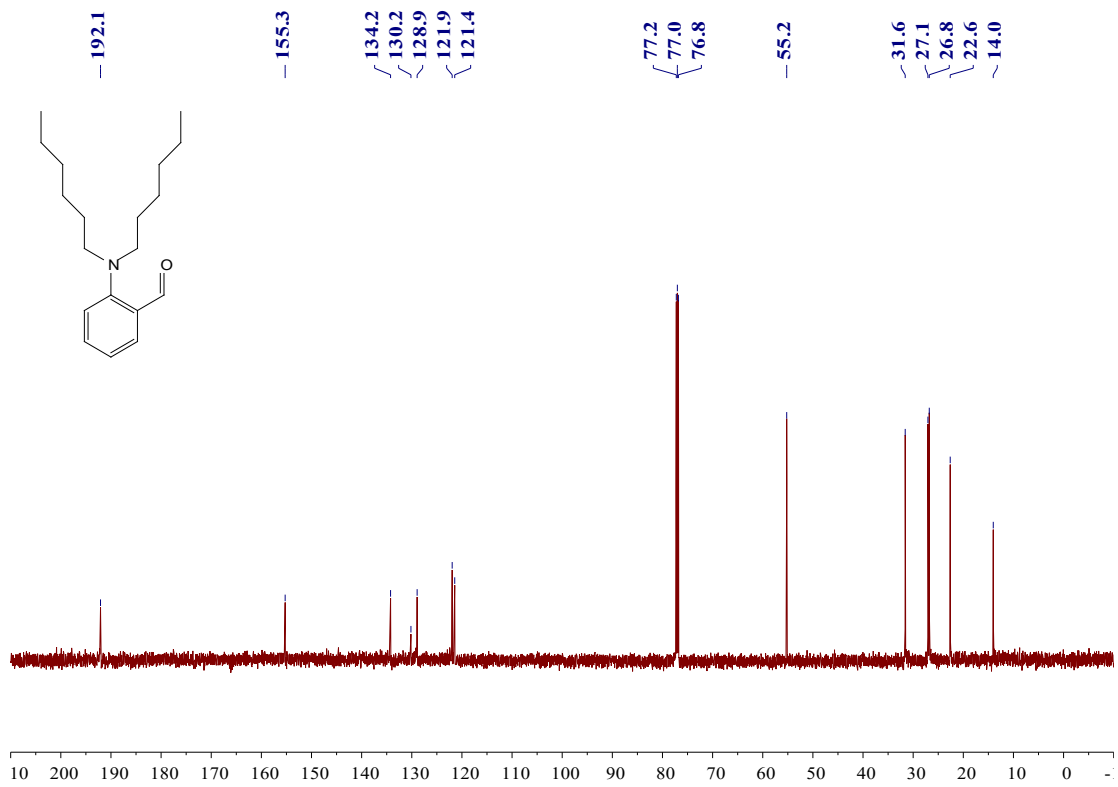

<sup>1</sup>H and <sup>13</sup>C NMR spectra of compound 1e

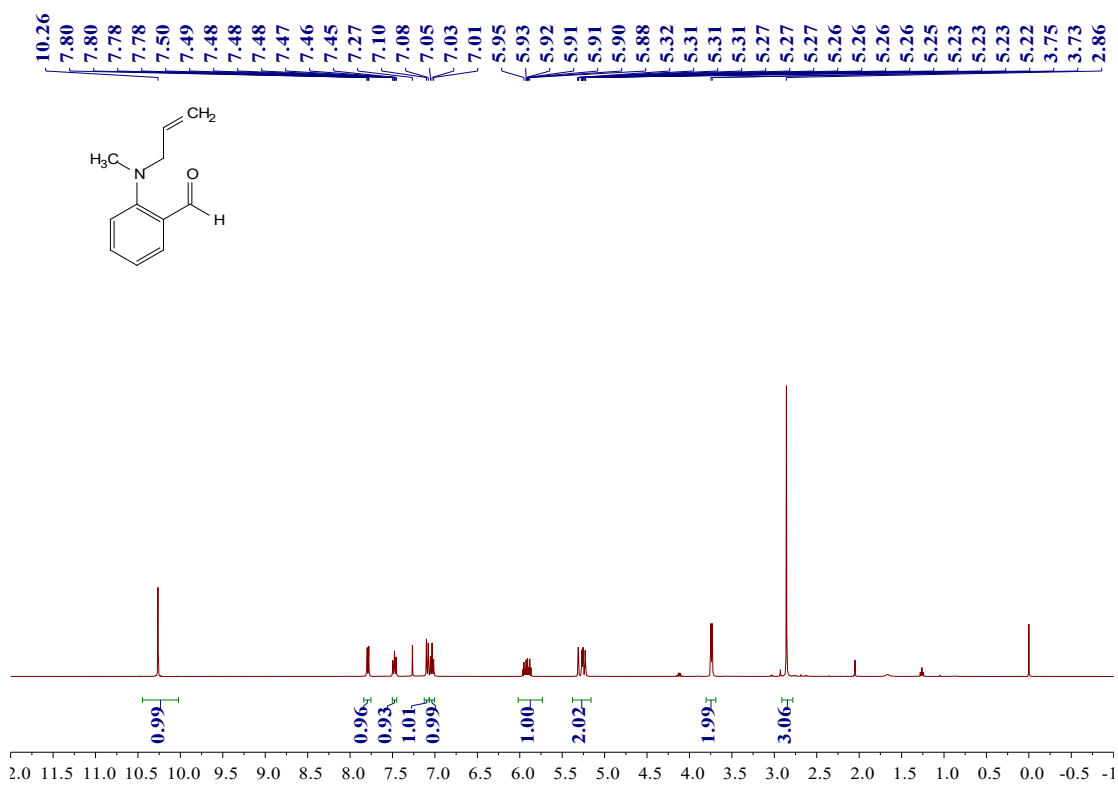

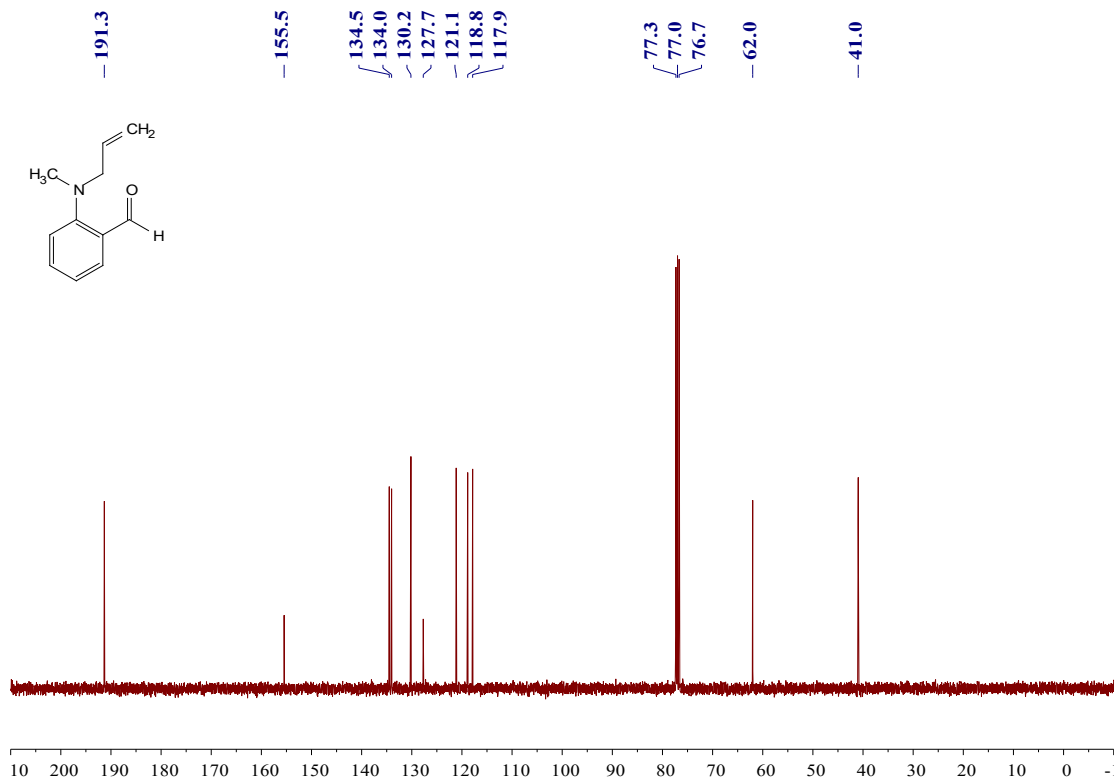

<sup>1</sup>H and <sup>13</sup>C NMR spectra of compound 1g

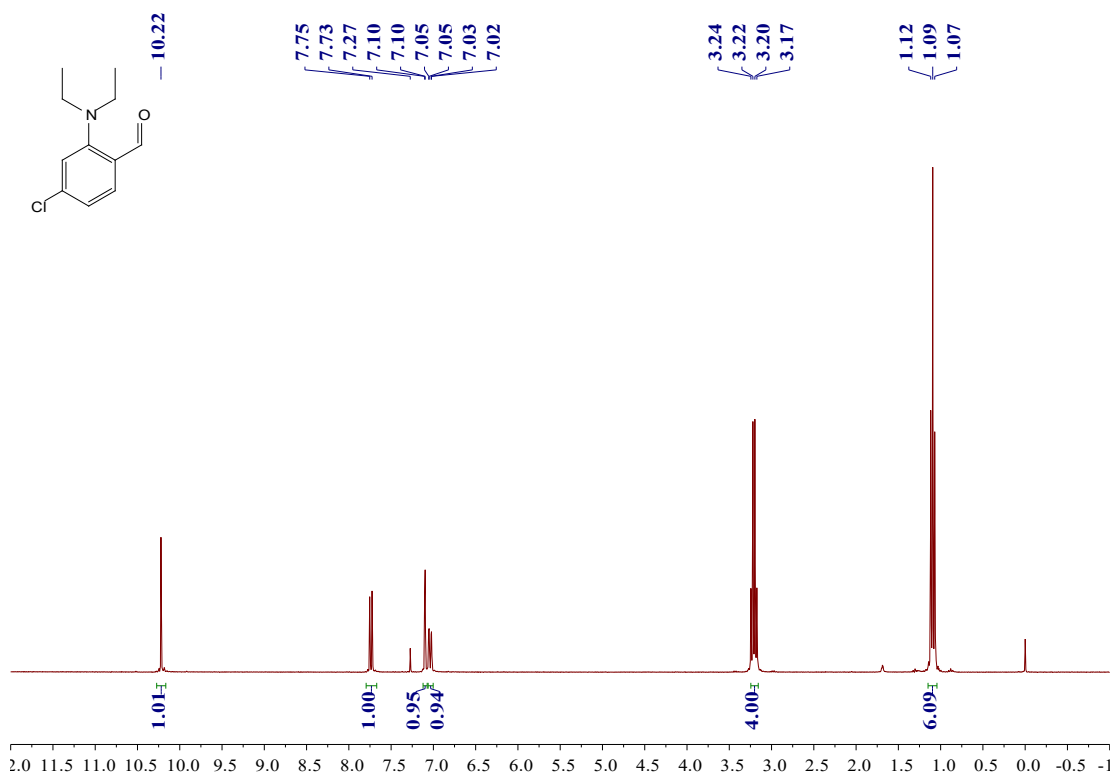

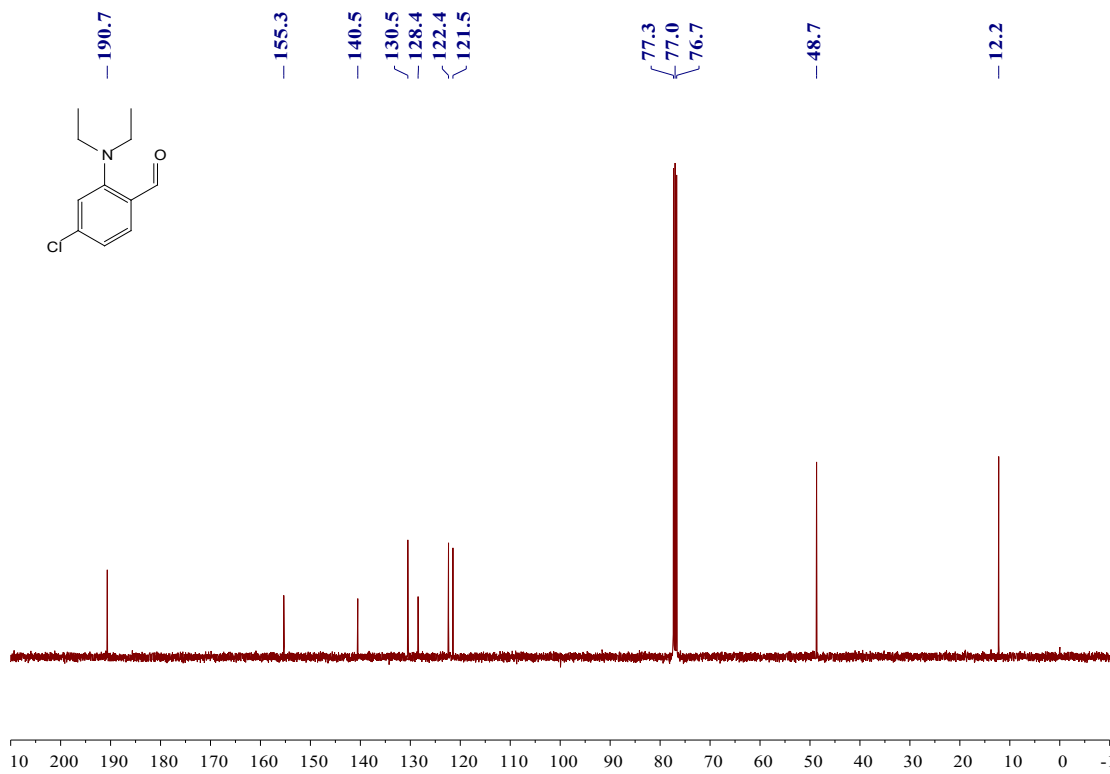

$^1\text{H}$  and  $^{13}\text{C}$  NMR spectra of compound **1h**

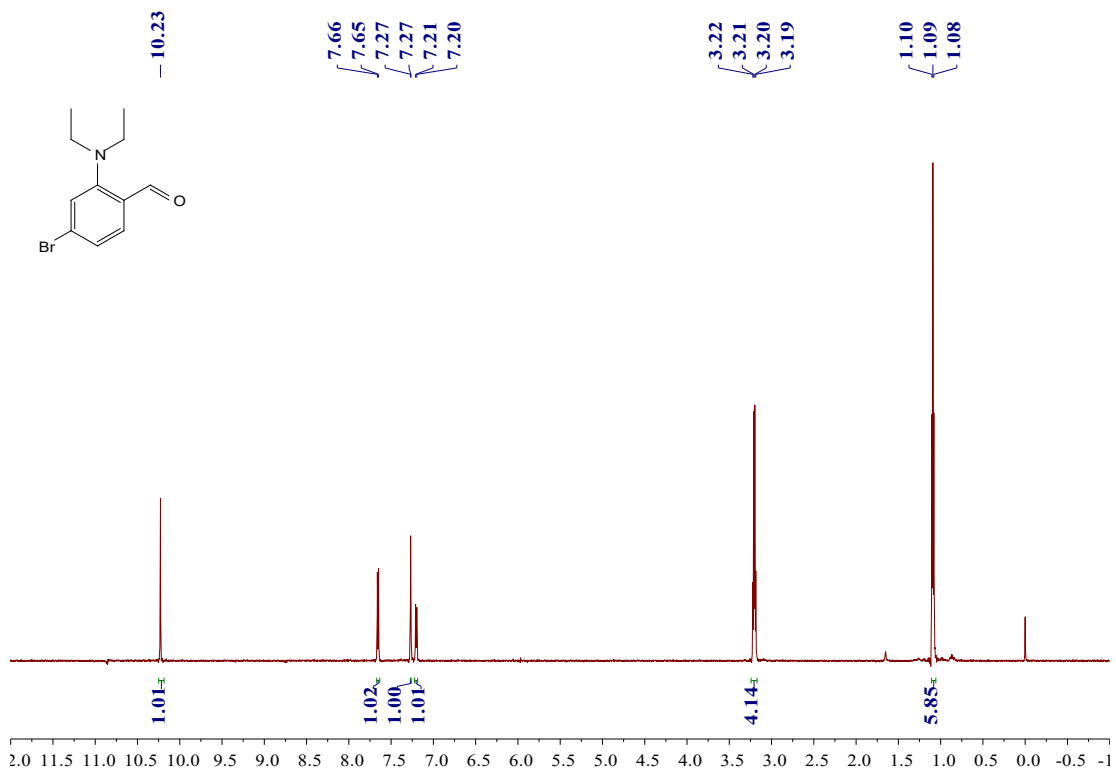

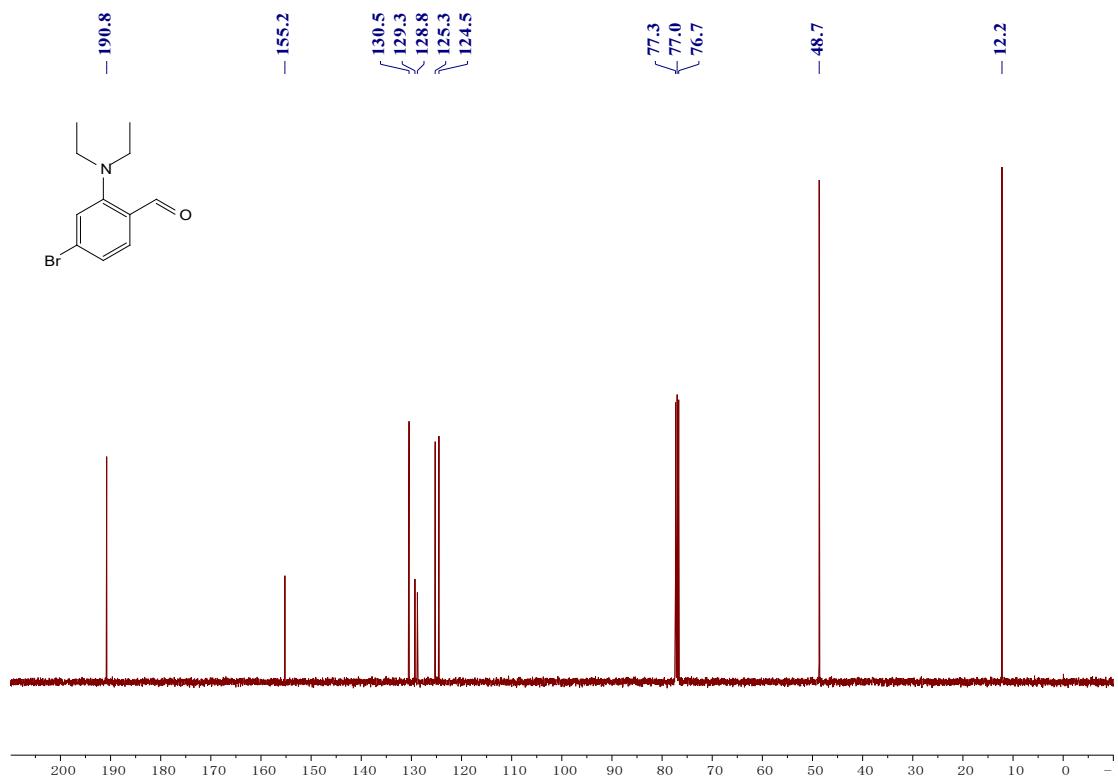

<sup>1</sup>H and <sup>13</sup>C NMR spectra of compound **1i**

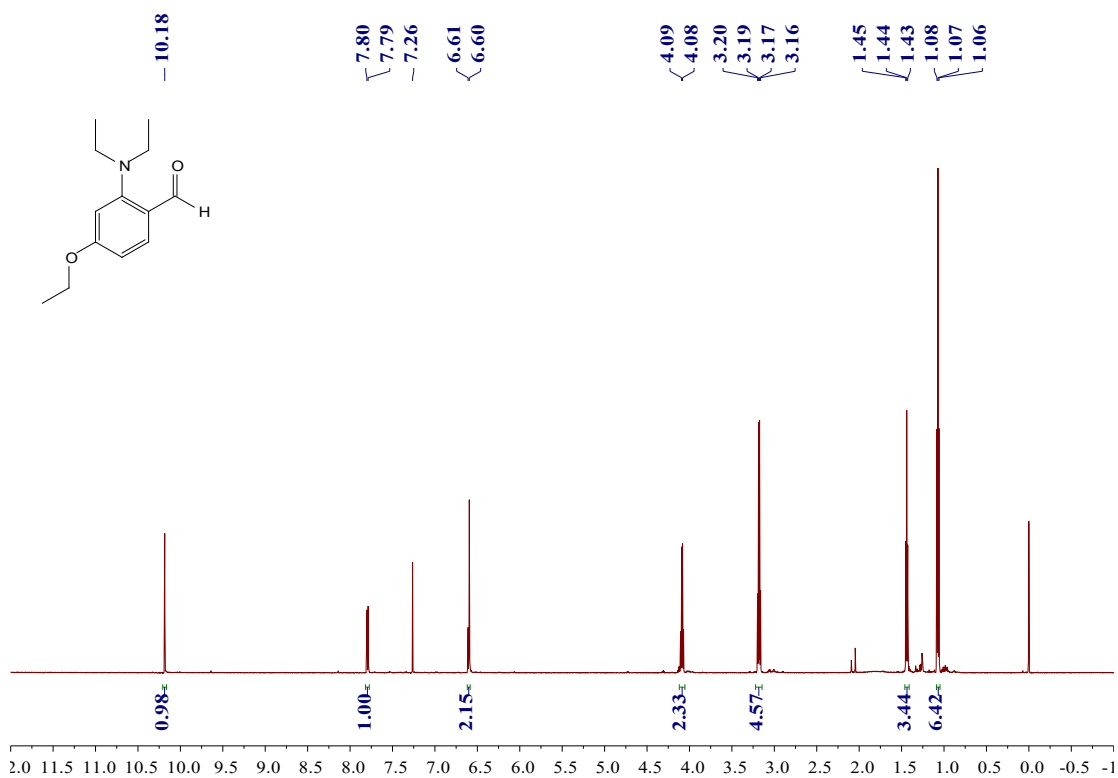

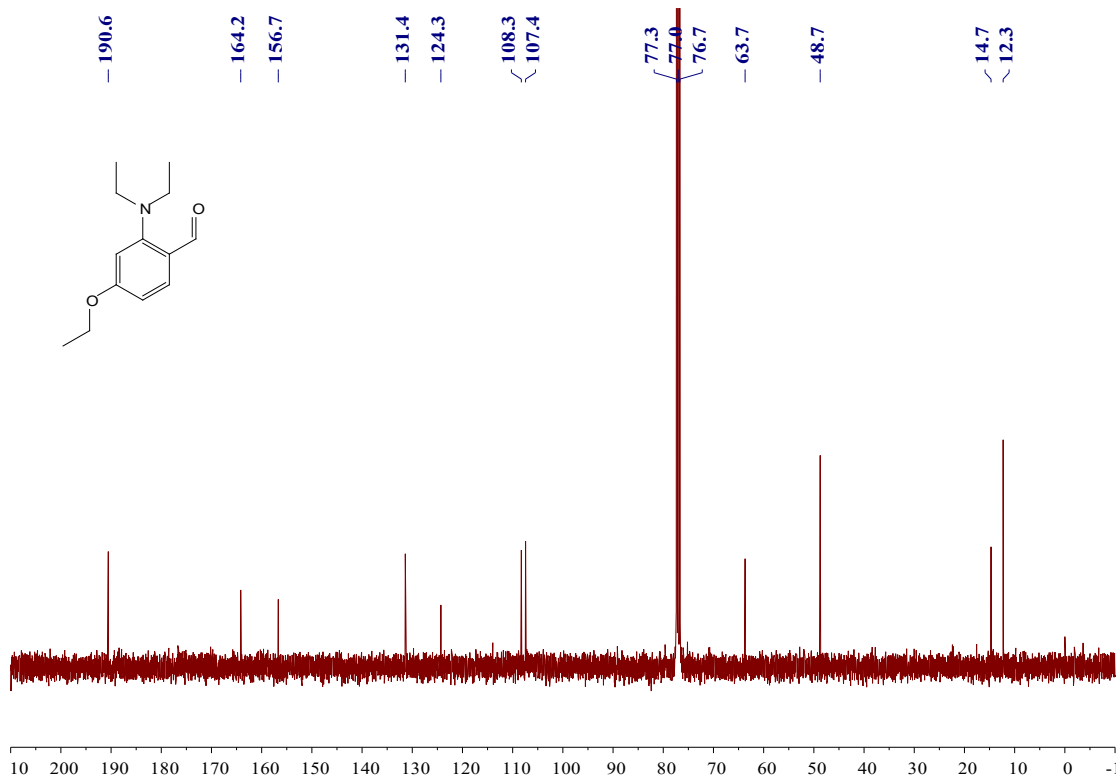

<sup>1</sup>H and <sup>13</sup>C NMR spectra of compound 1j

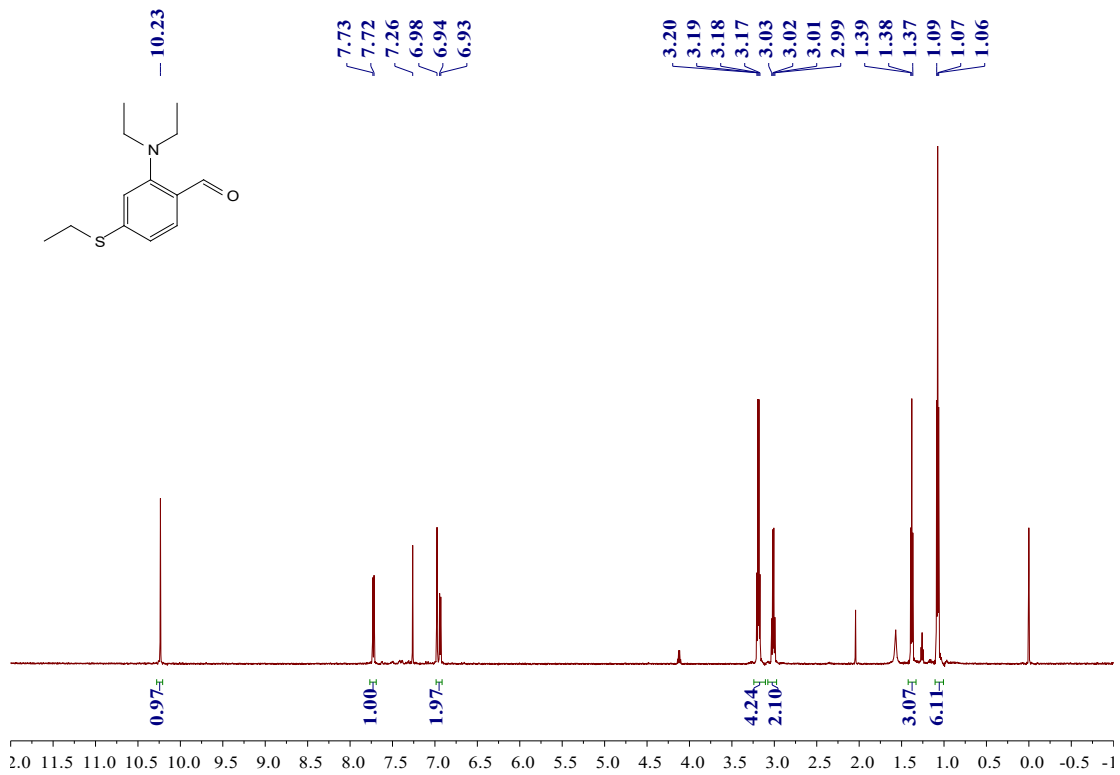

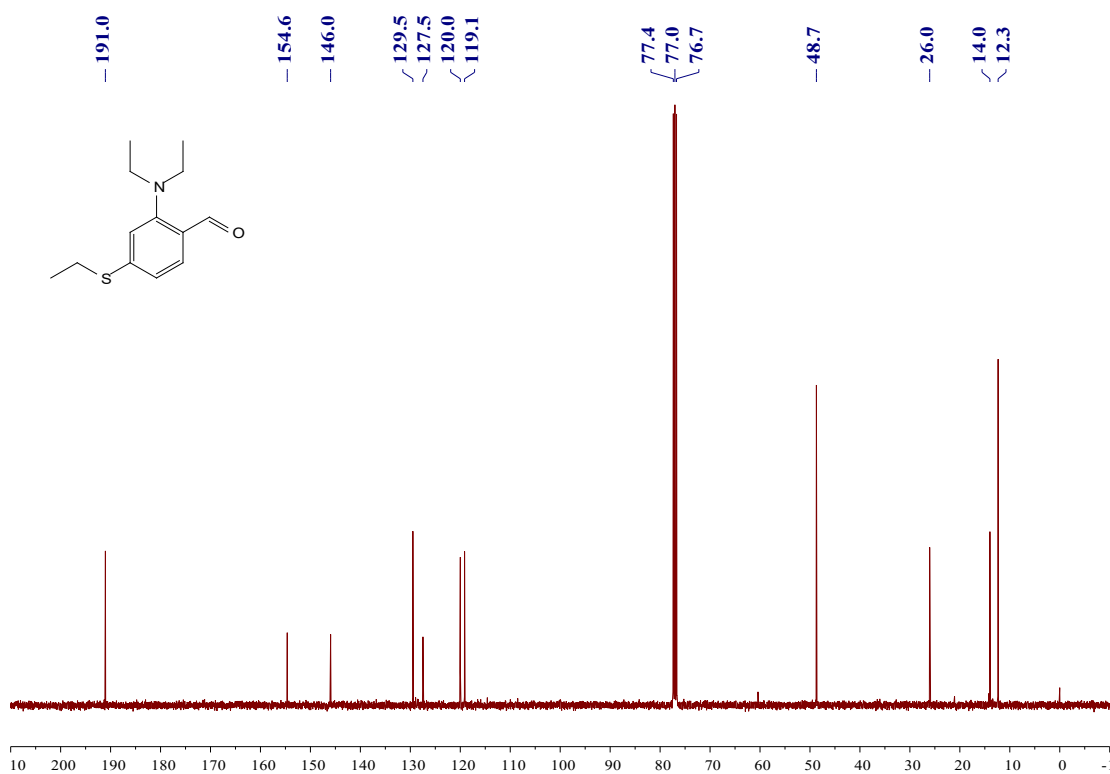

$^1\text{H}$  and  $^{13}\text{C}$  NMR spectra of compound **1k**

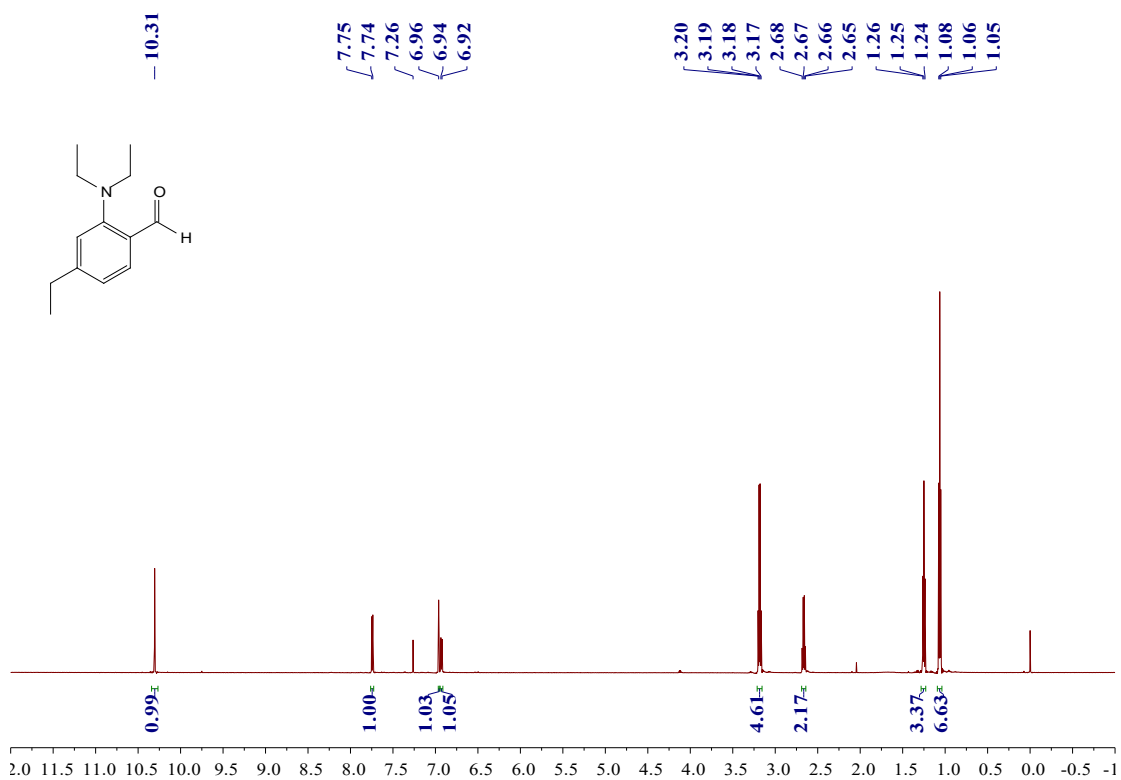

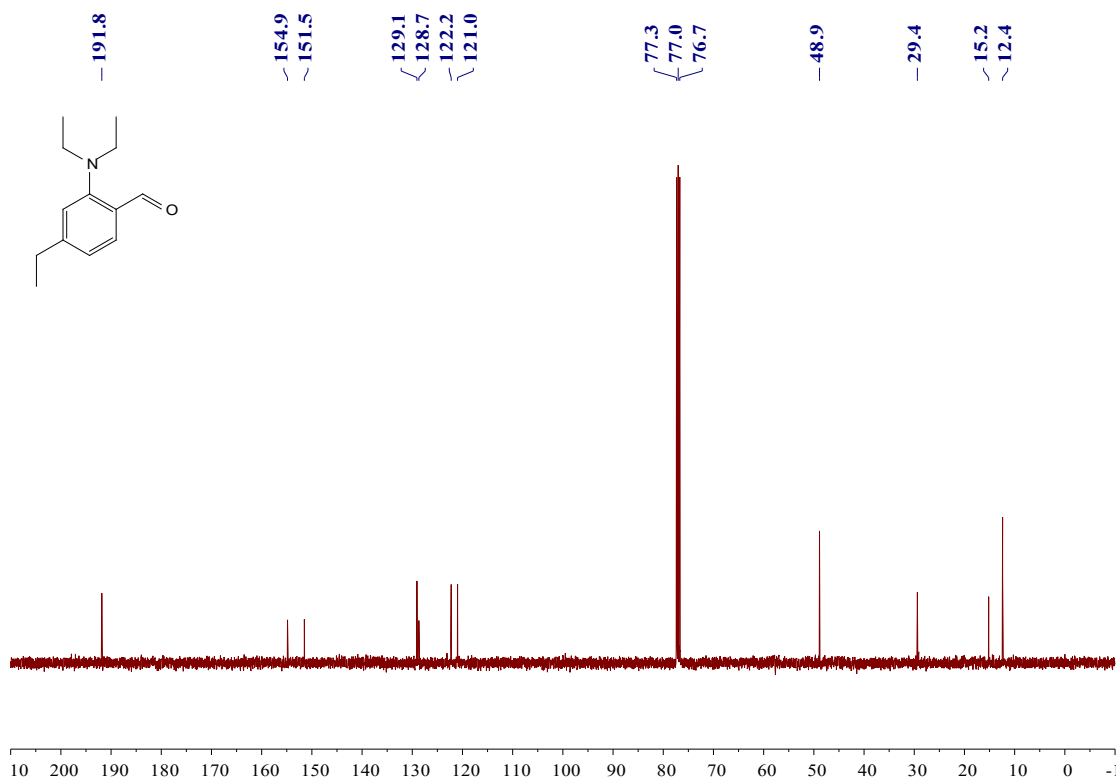

<sup>1</sup>H, <sup>13</sup>C and <sup>19</sup>F NMR spectra of compound 11

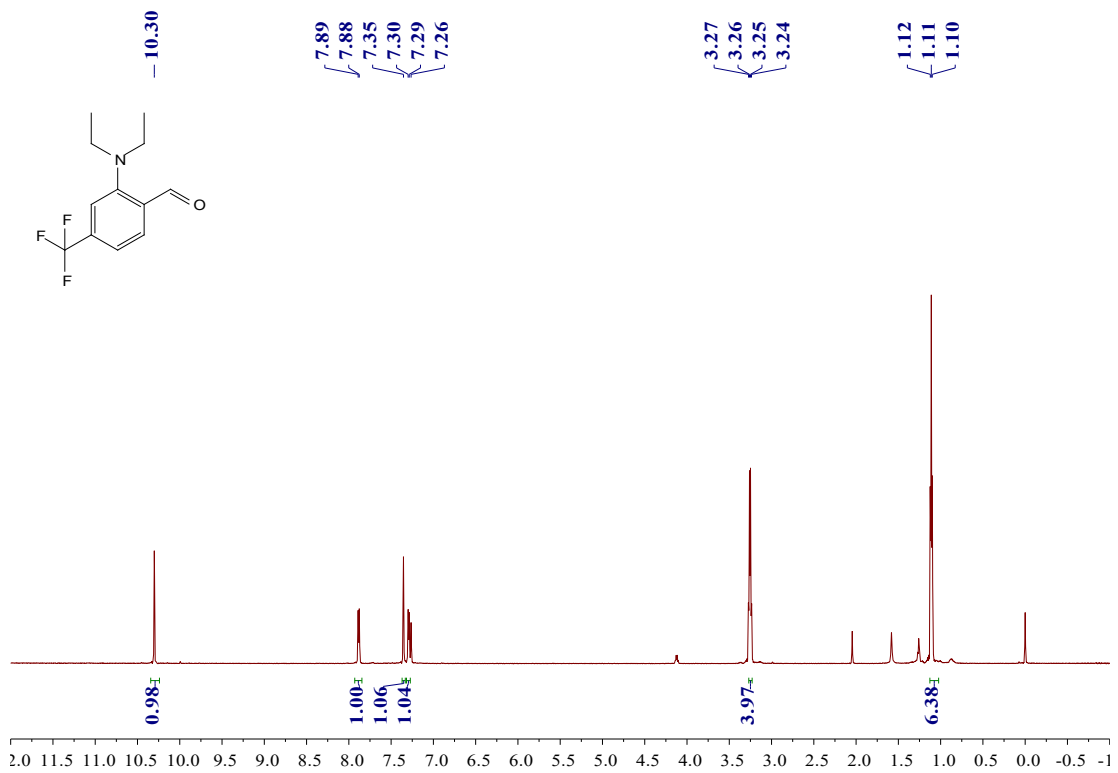

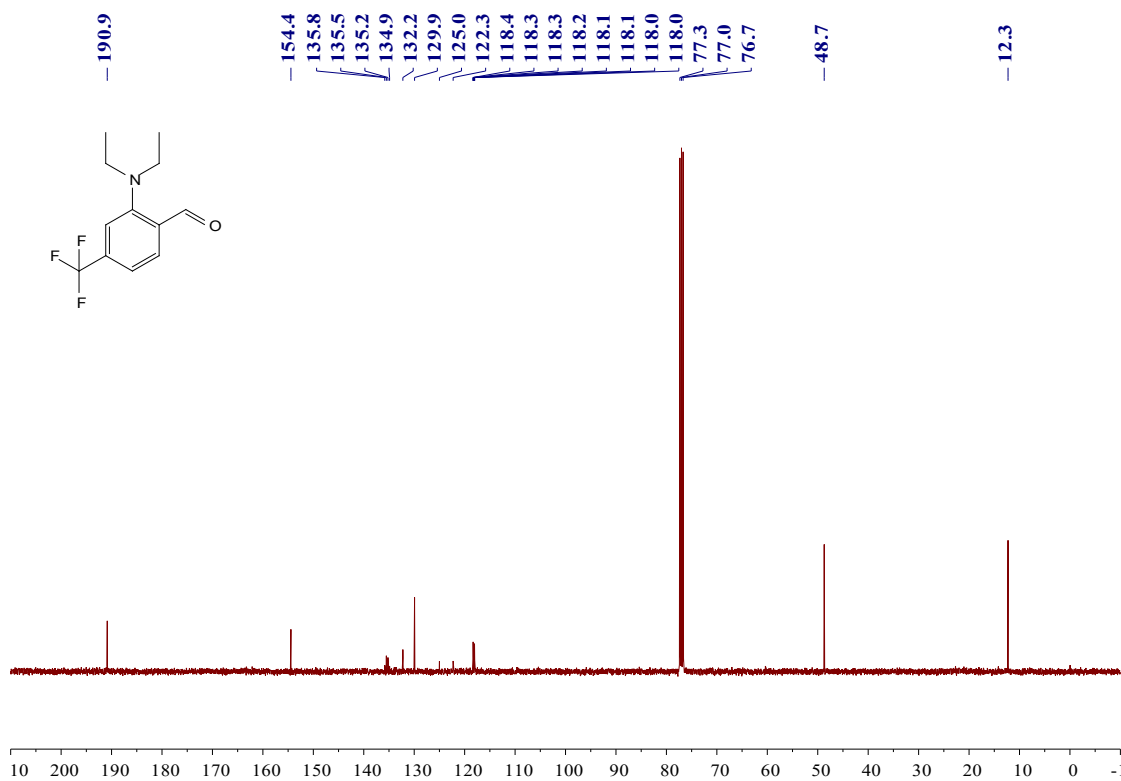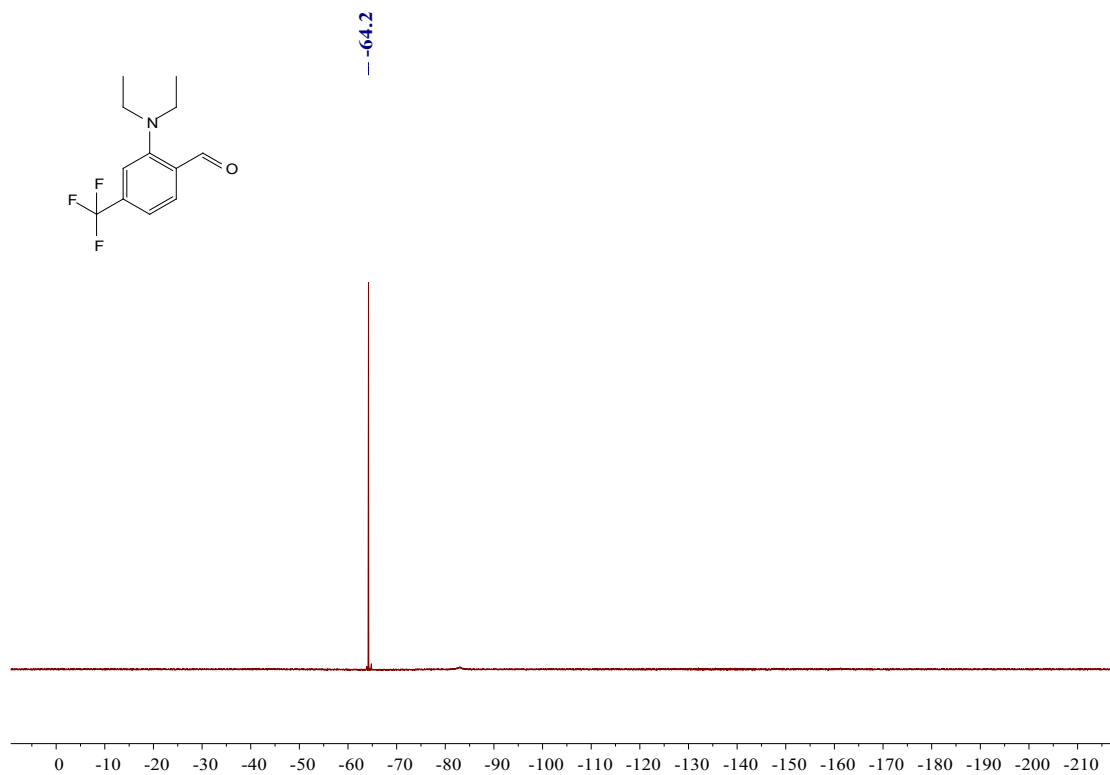

<sup>1</sup>H and <sup>13</sup>C NMR spectra of compound 1m



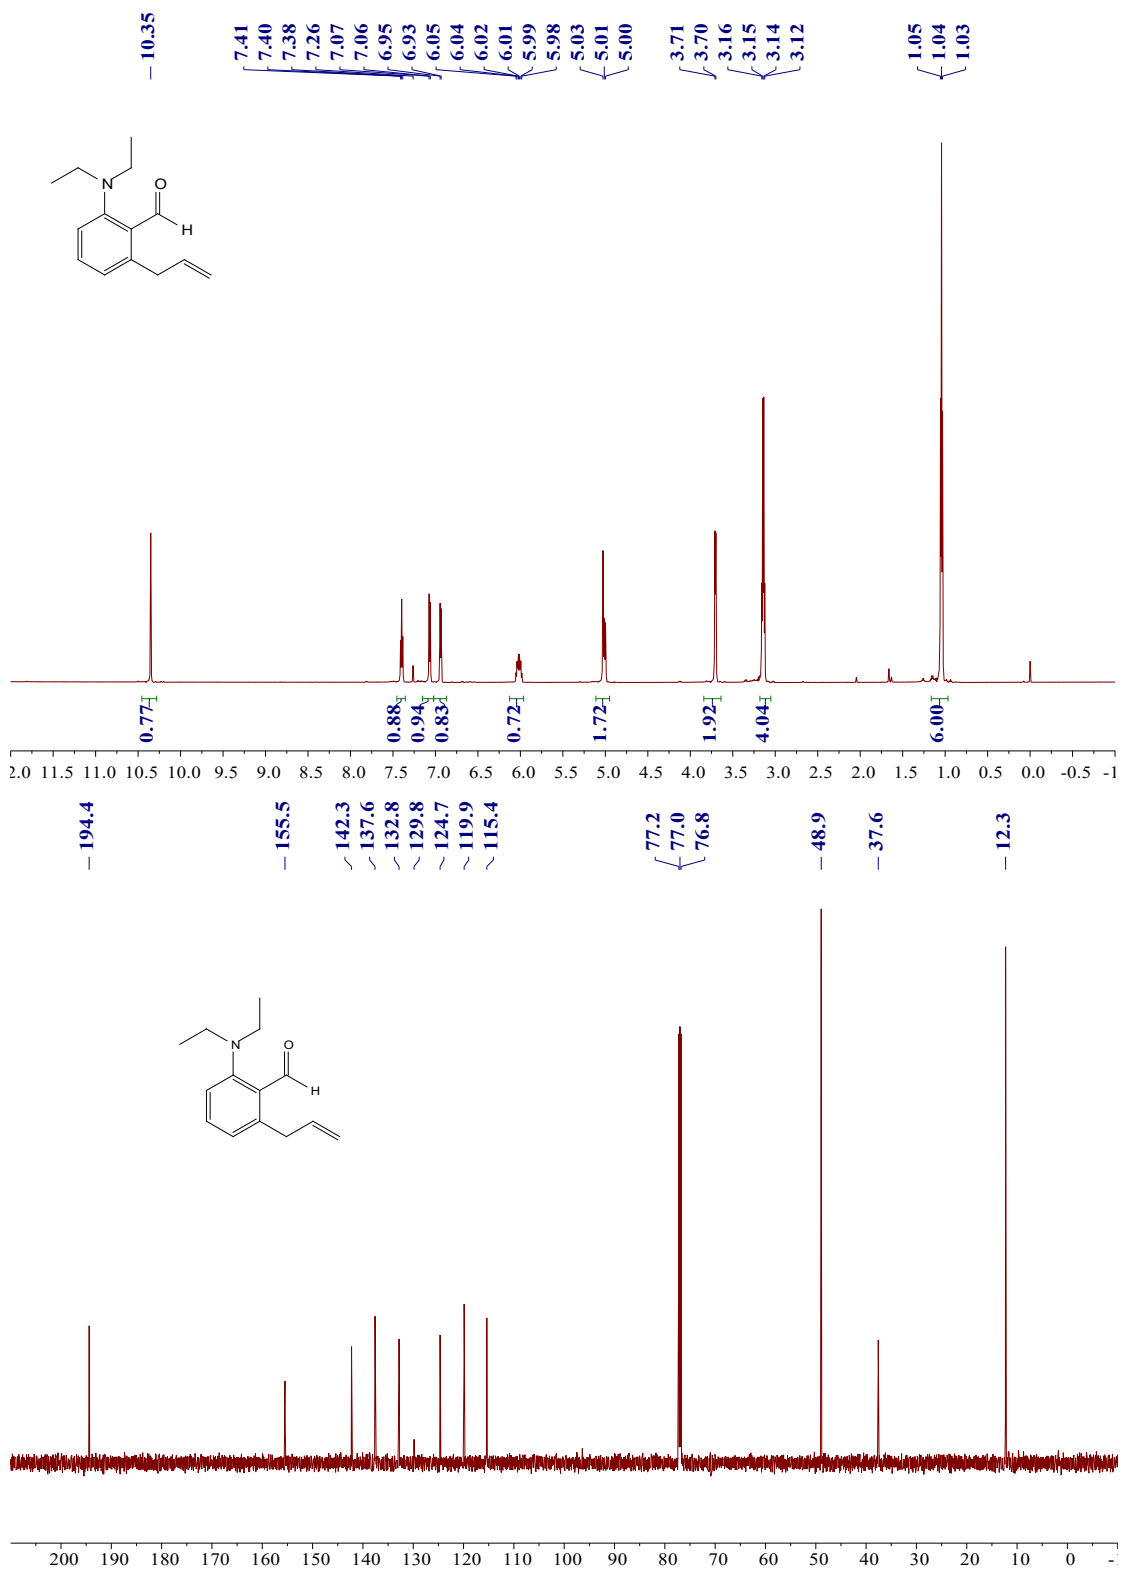

<sup>1</sup>H and <sup>13</sup>C NMR spectra of compound **1n**

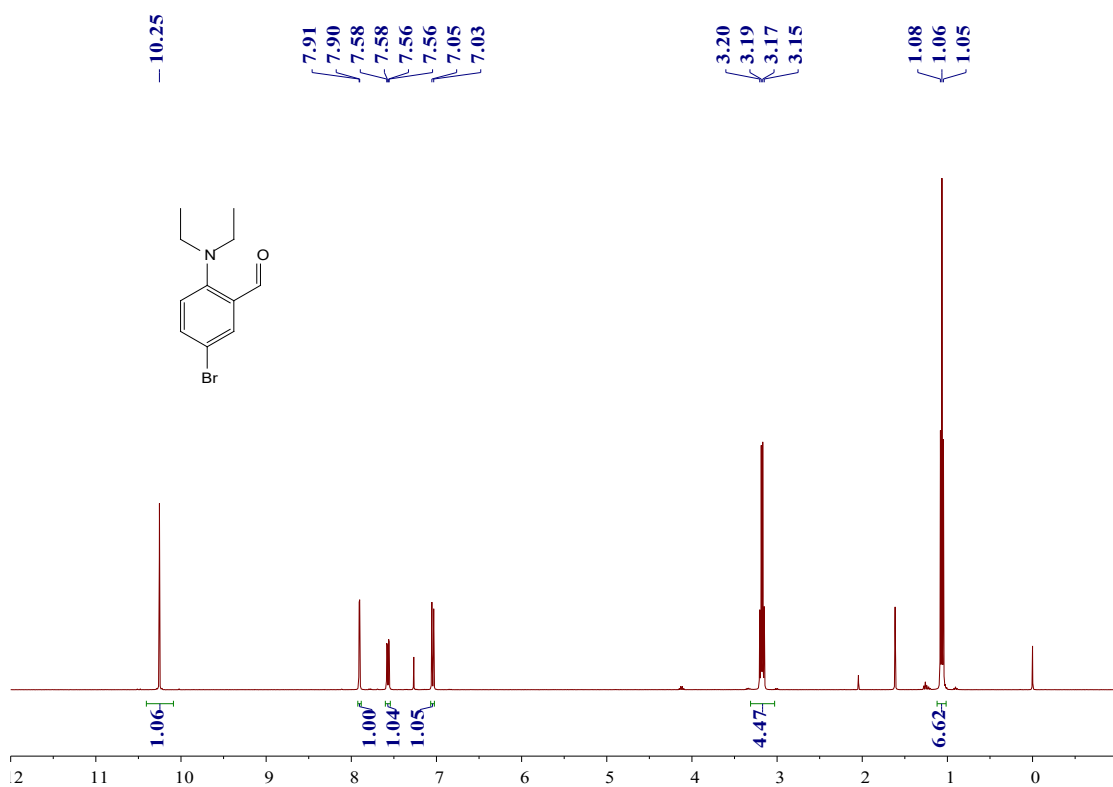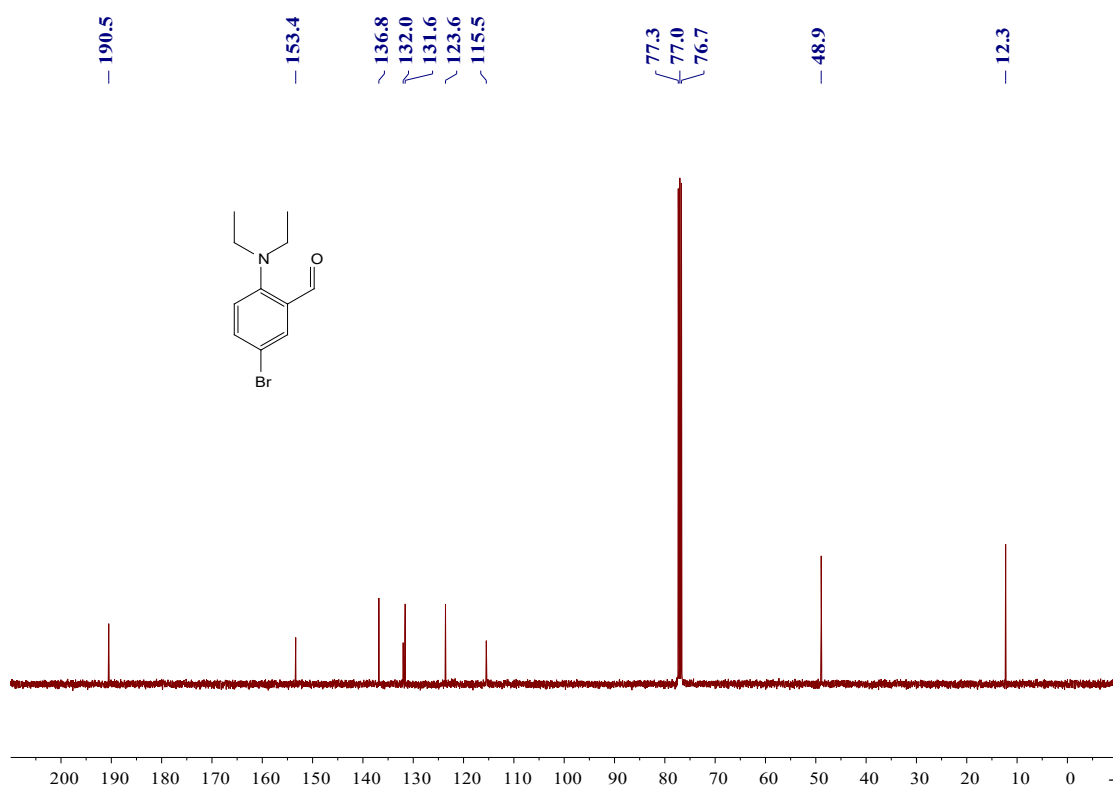

$^1\text{H}$  and  $^{13}\text{C}$  NMR spectra of compound **1a'**

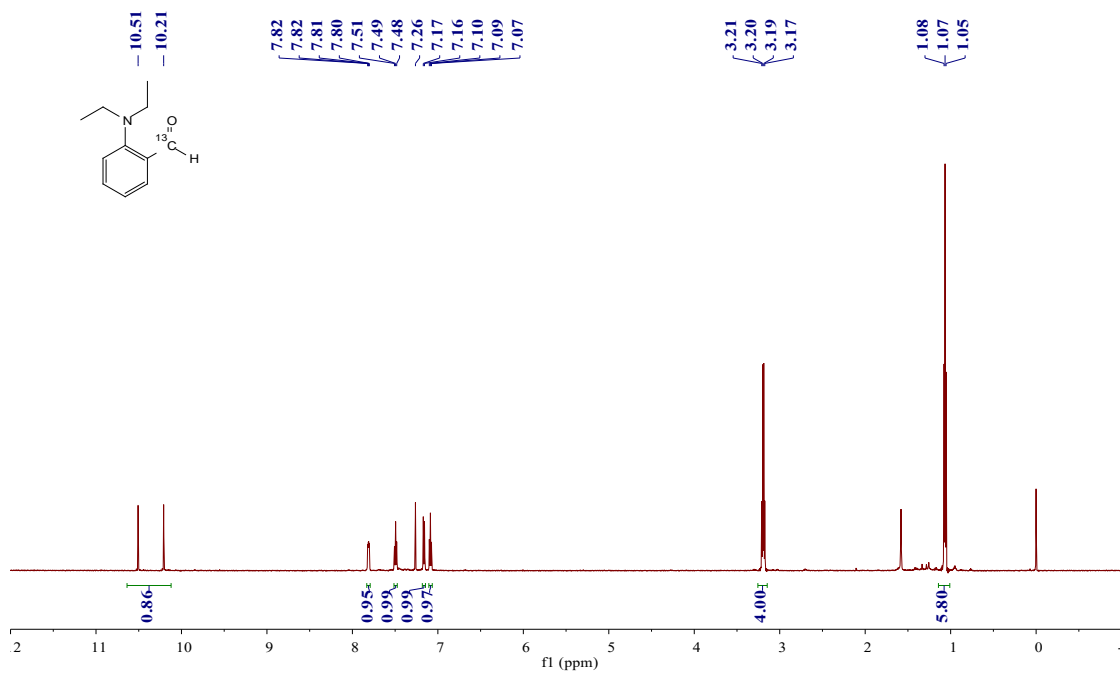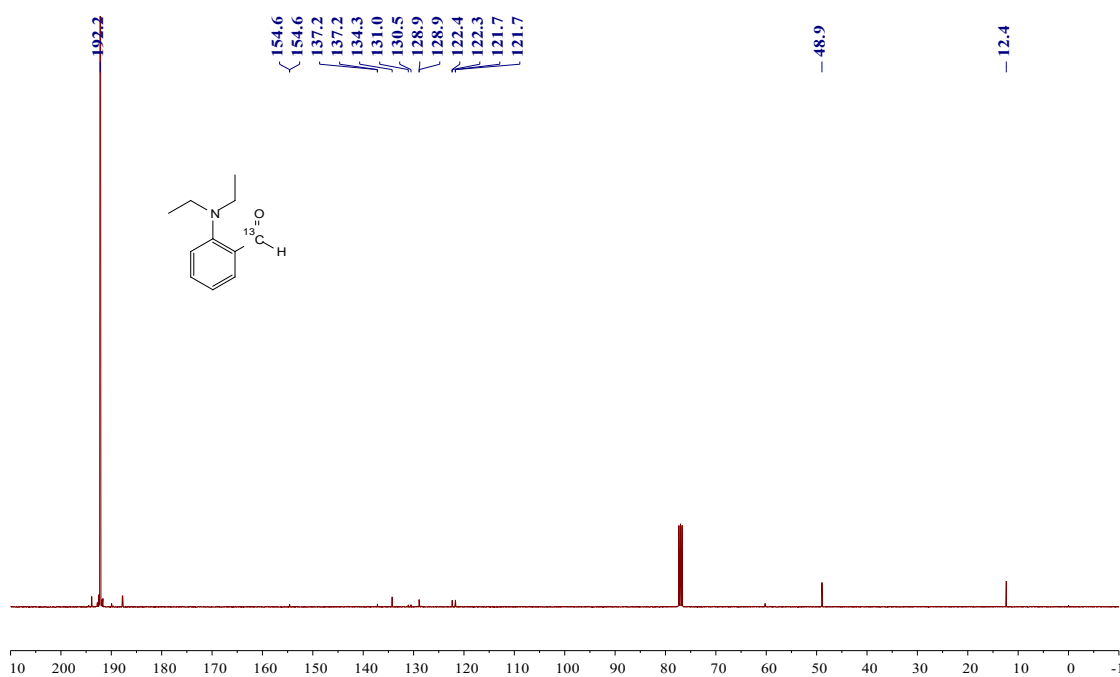

$^1\text{H}$  and  $^{13}\text{C}$  NMR spectra of compound **1b'**

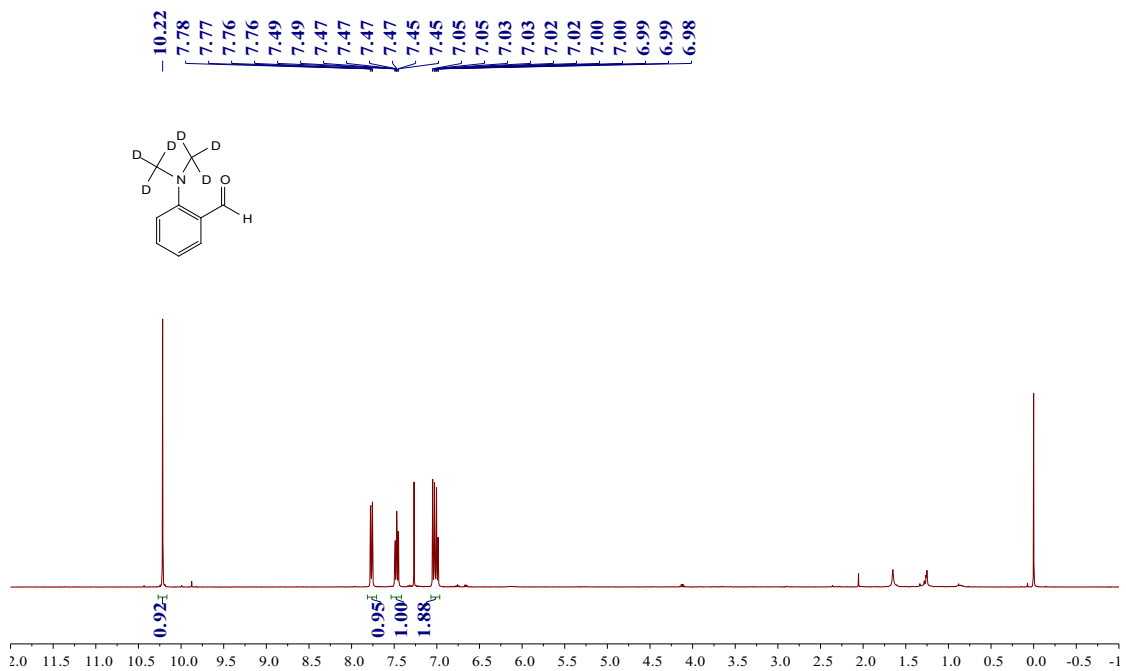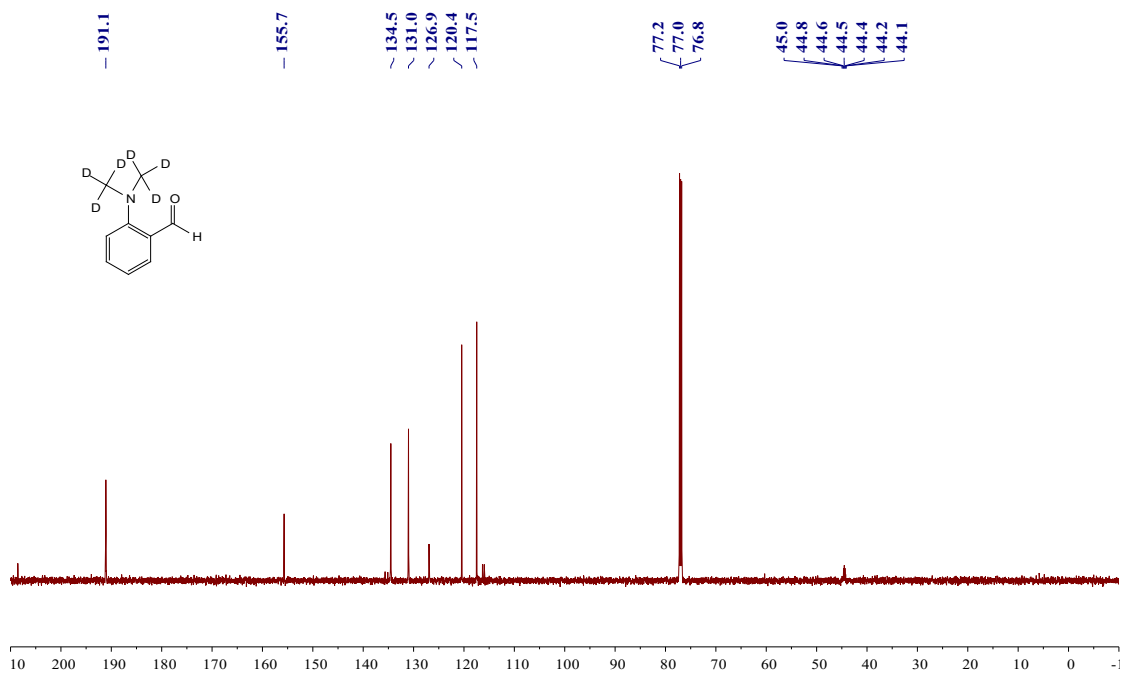

$^1\text{H}$  and  $^{13}\text{C}$  NMR spectra of compound 1a''

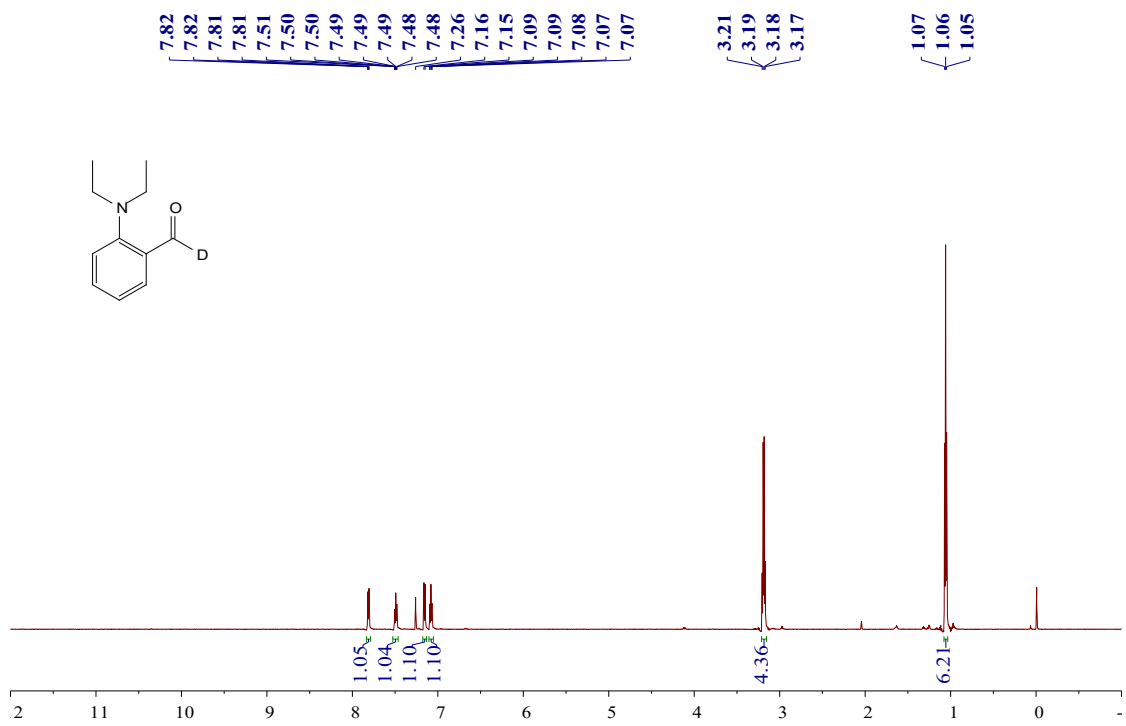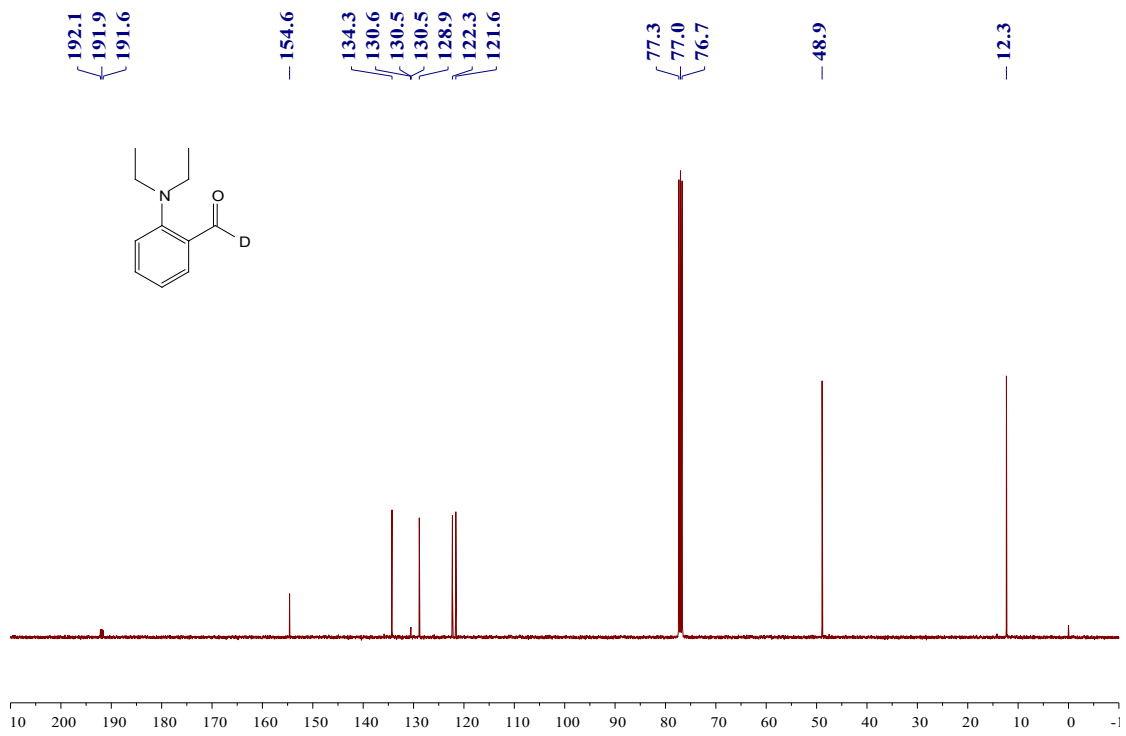

$^1\text{H}$  and  $^{13}\text{C}$  NMR spectra of compound **3aa**

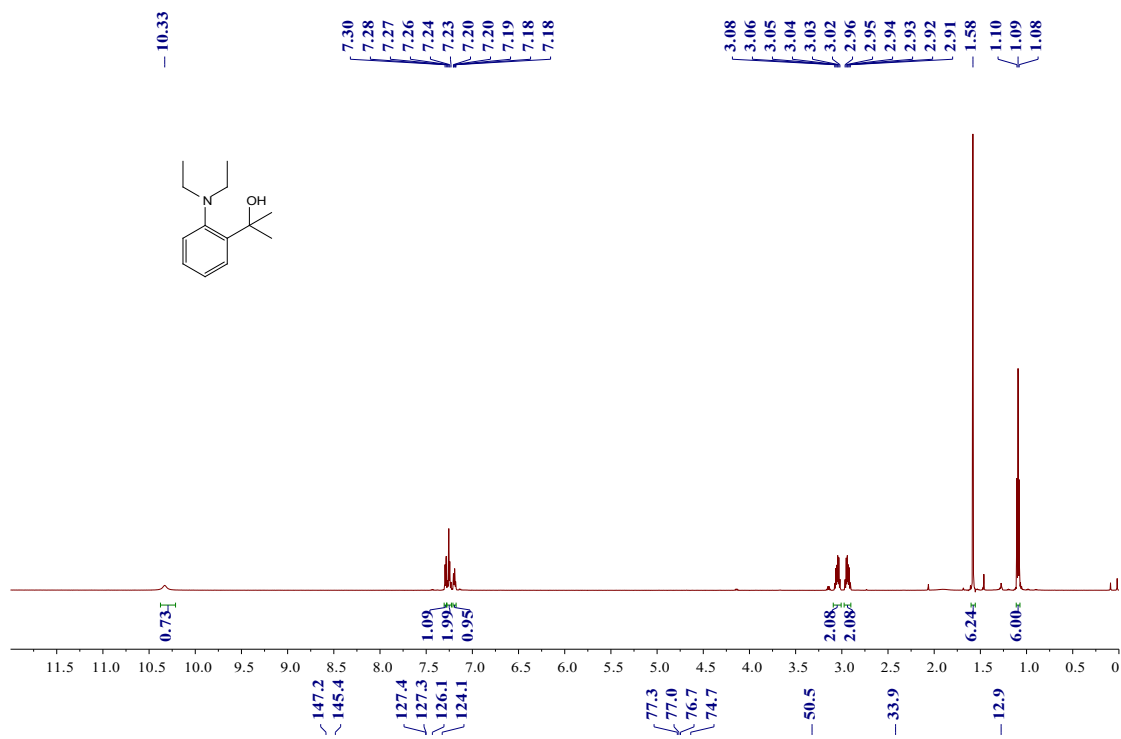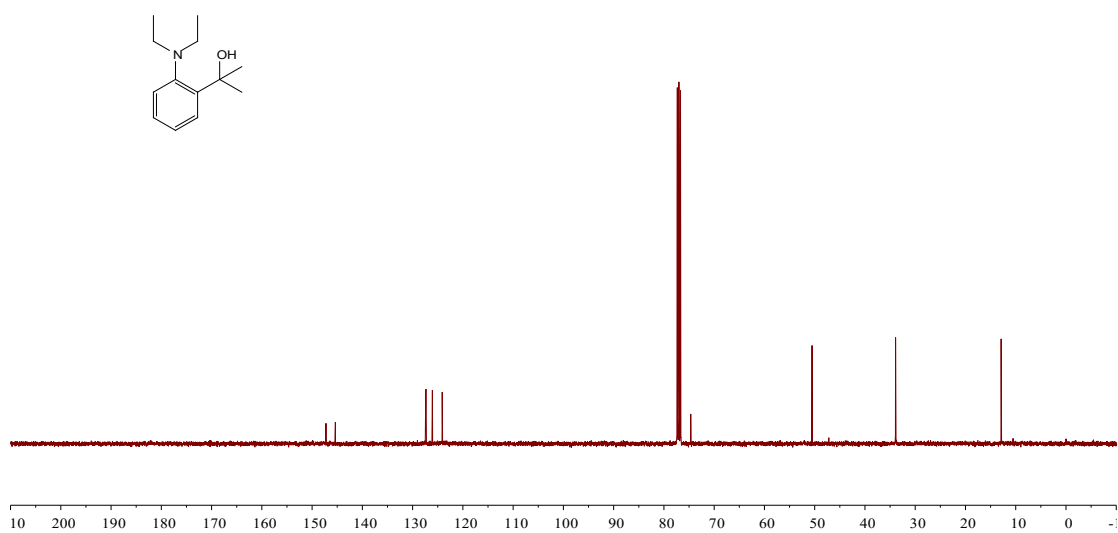

$^1\text{H}$  and  $^{13}\text{C}$  NMR spectra of compound **3ba**

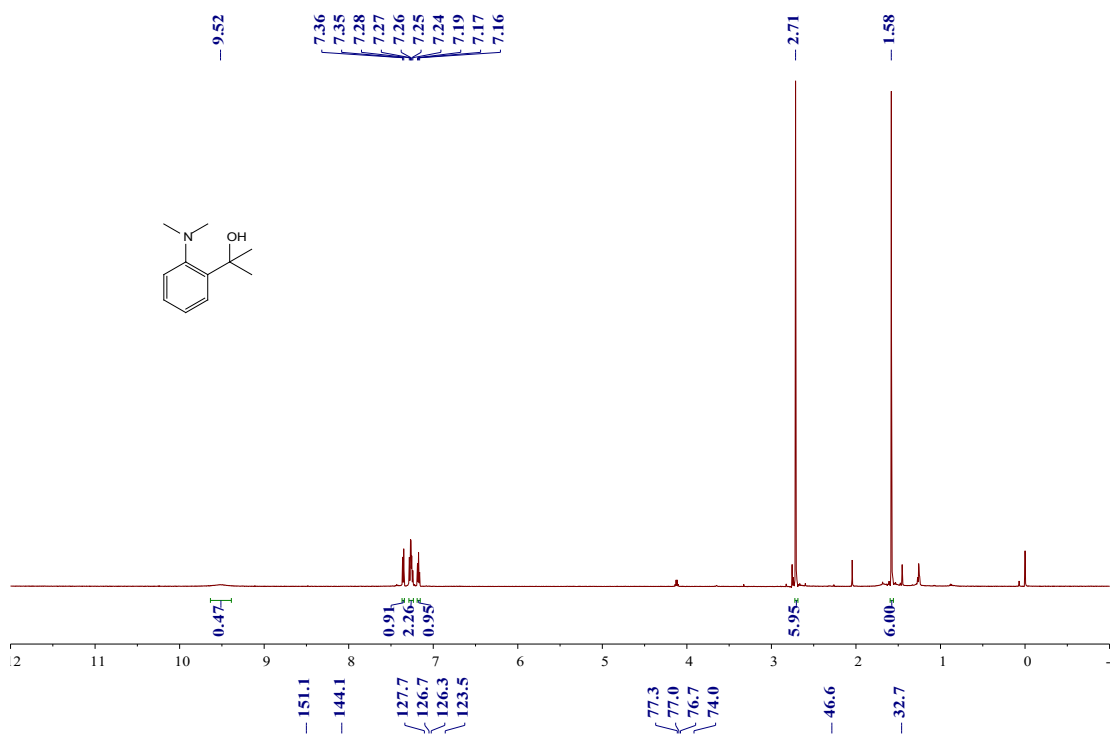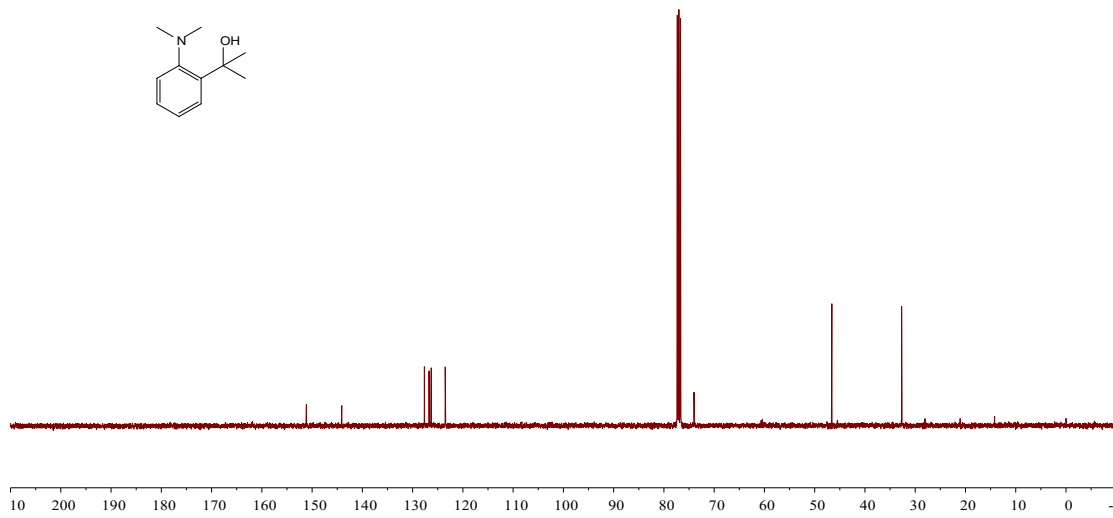

<sup>1</sup>H and <sup>13</sup>C NMR spectra of compound **3ca**

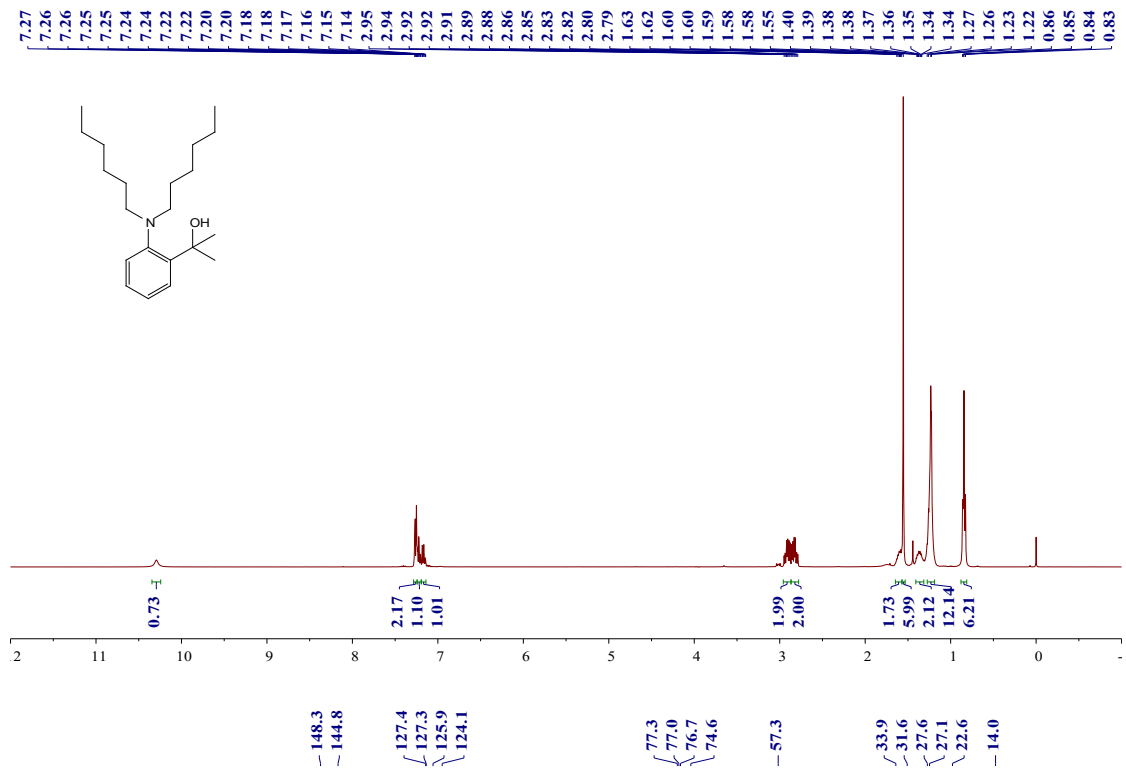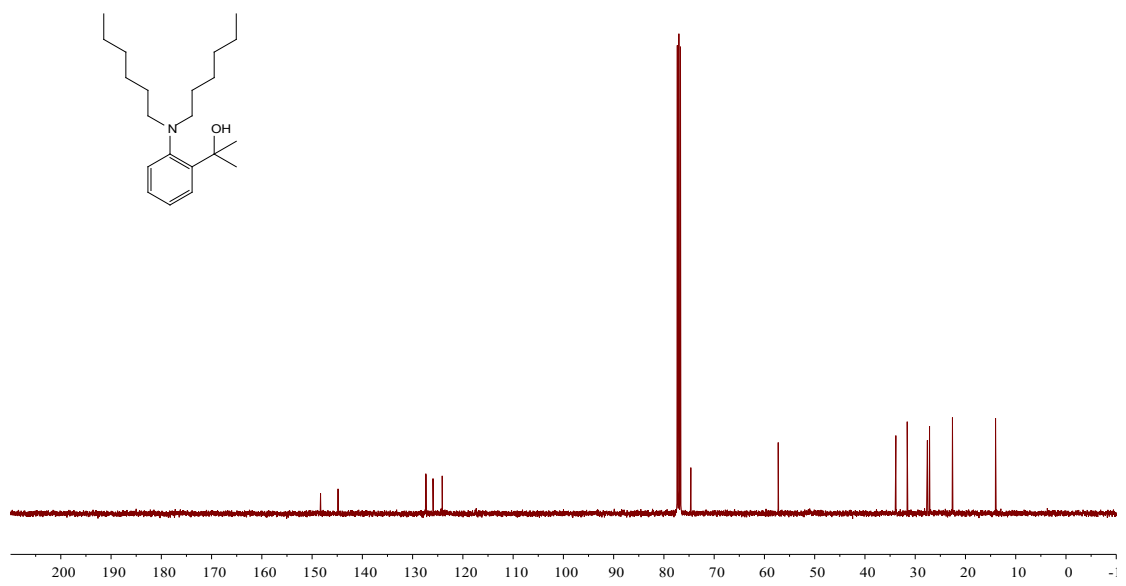

<sup>1</sup>H and <sup>13</sup>C NMR spectra of compound 3da



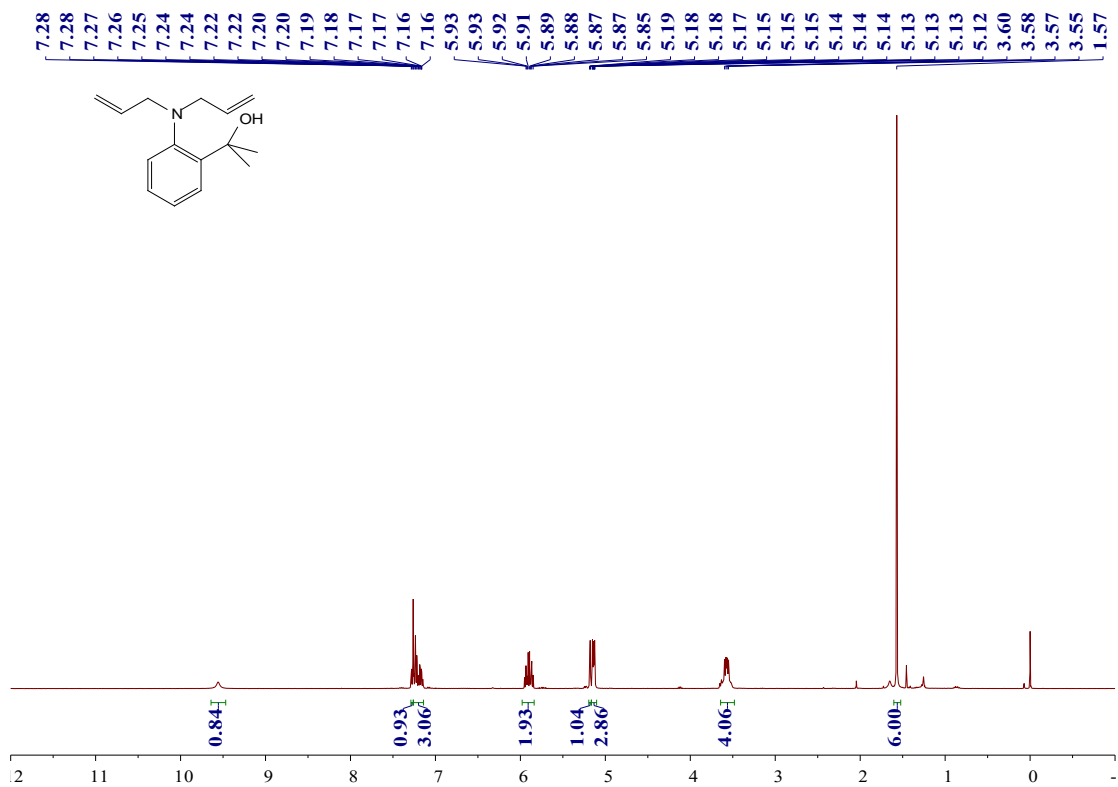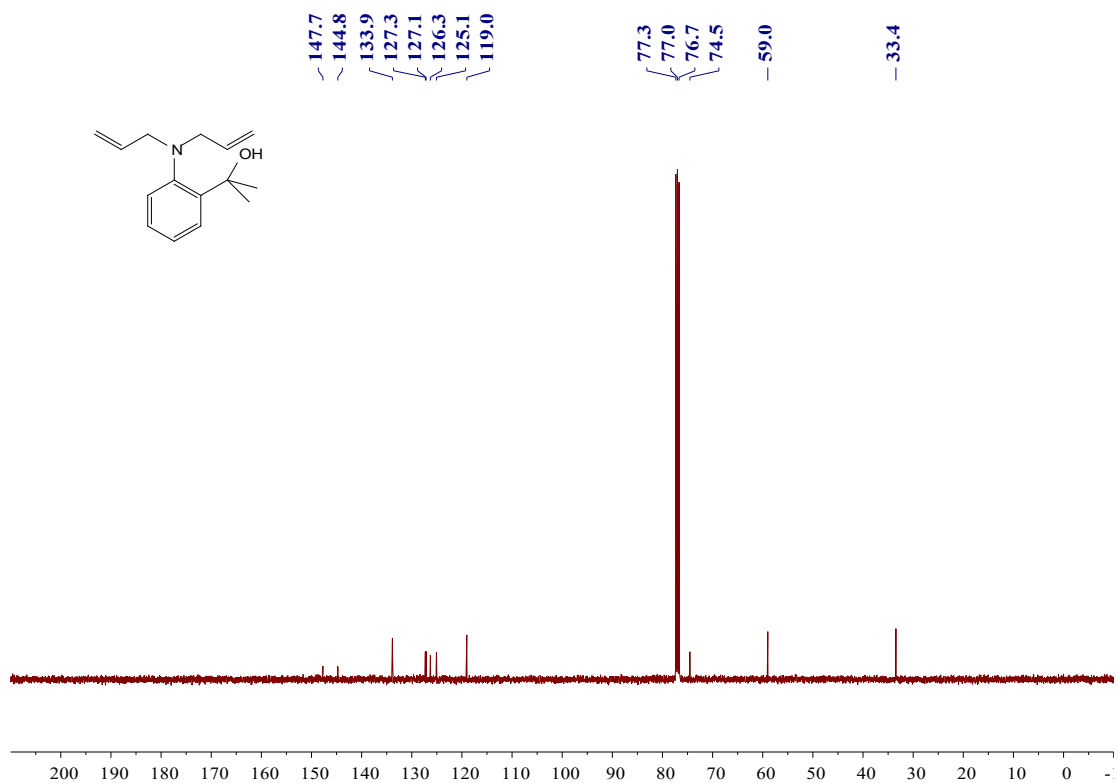

<sup>1</sup>H and <sup>13</sup>C NMR spectra of compound 3ea

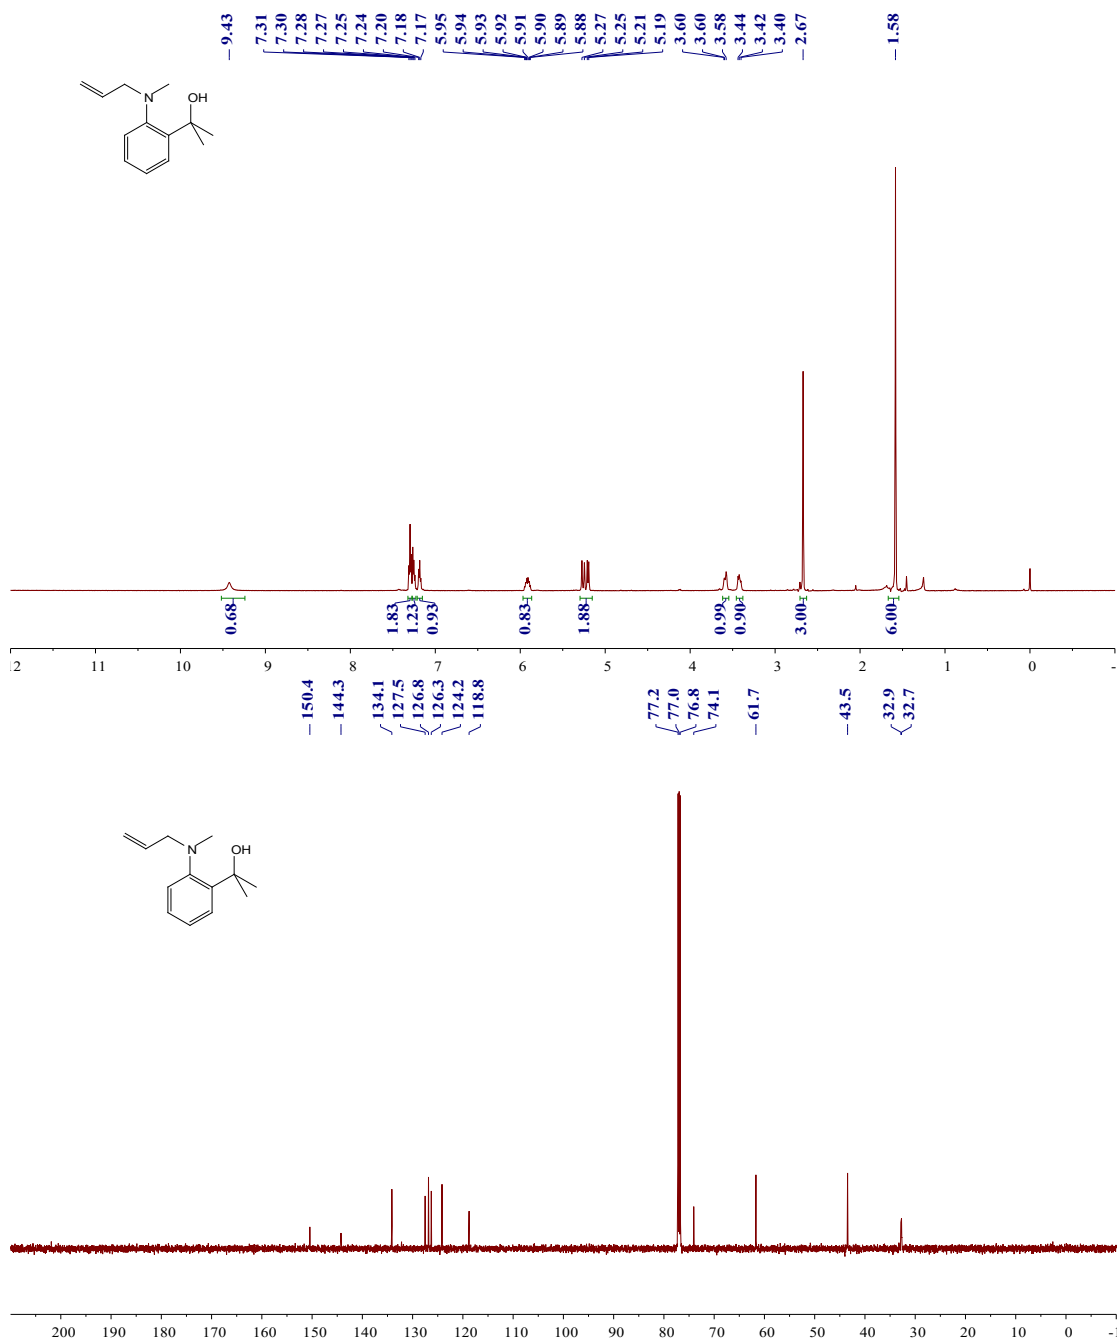

<sup>1</sup>H and <sup>13</sup>C NMR spectra of compound **3fa**

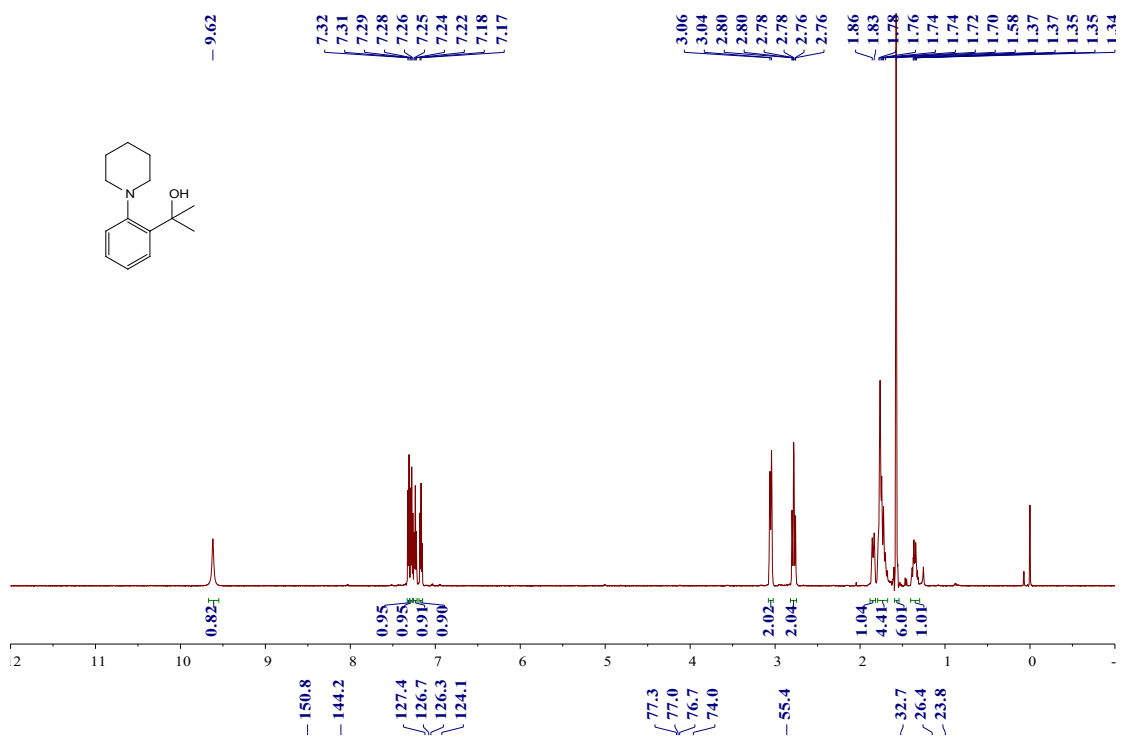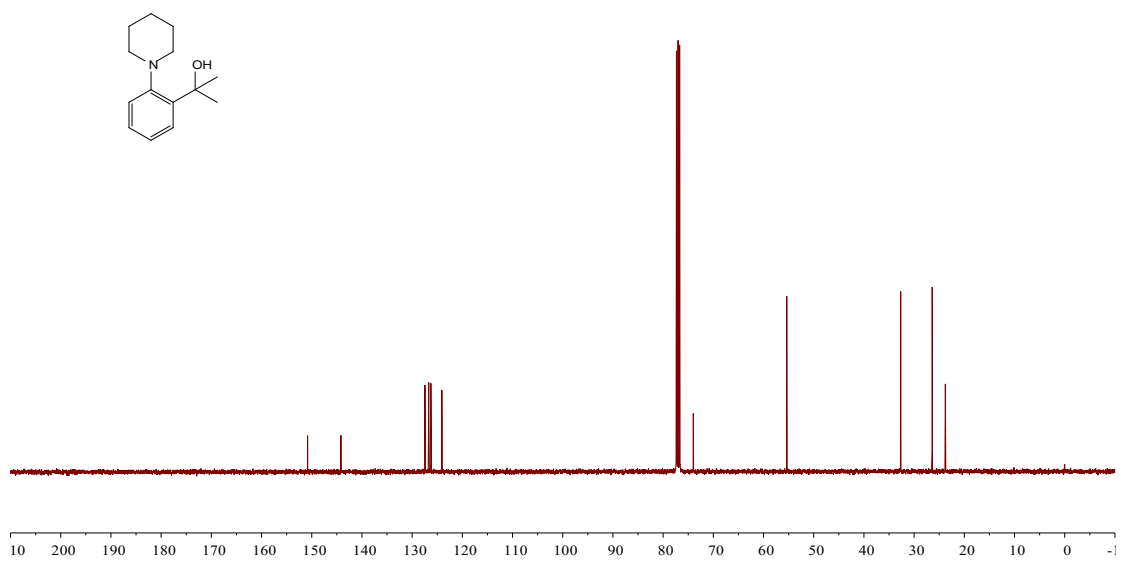

<sup>1</sup>H and <sup>13</sup>C NMR spectra of compound **3ga**

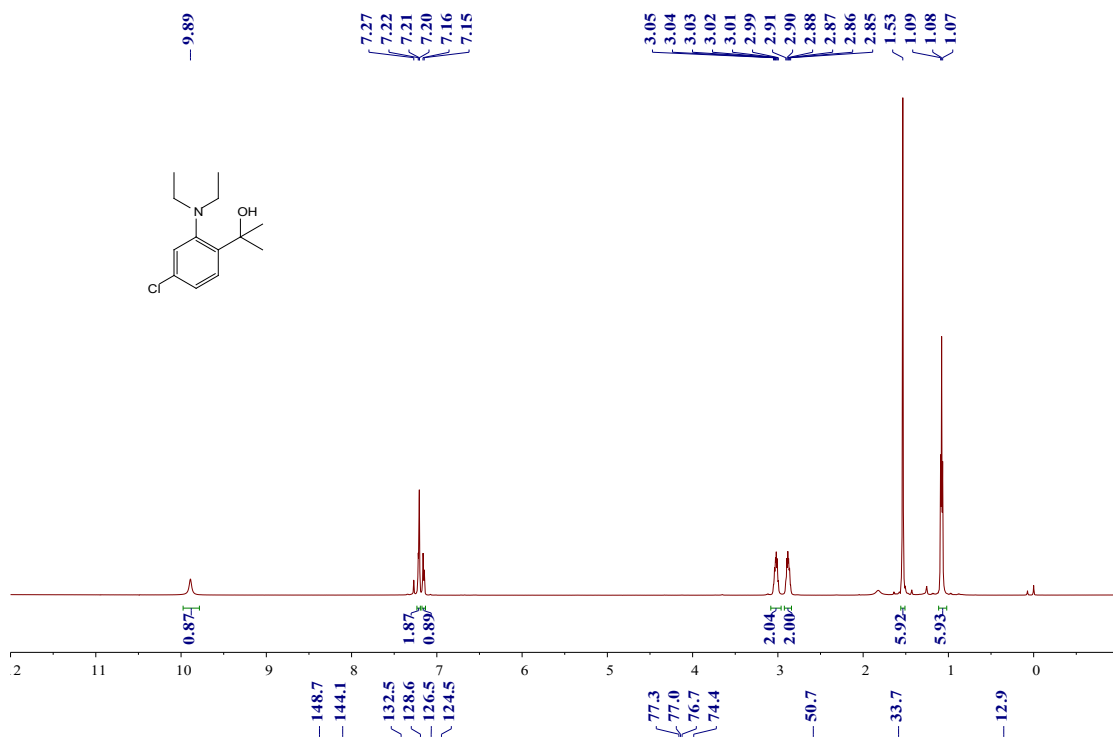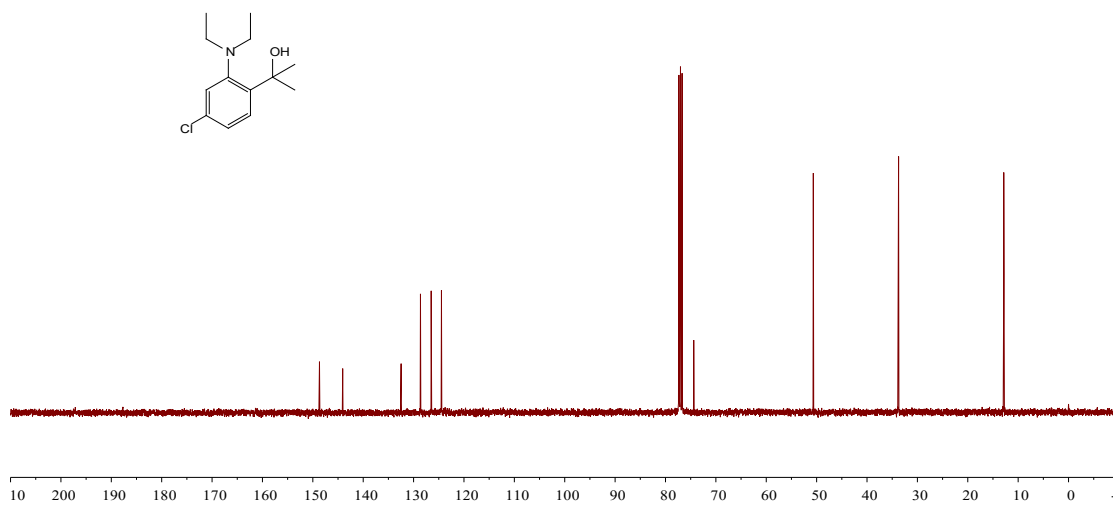

<sup>1</sup>H and <sup>13</sup>C NMR spectra of compound **3ha**

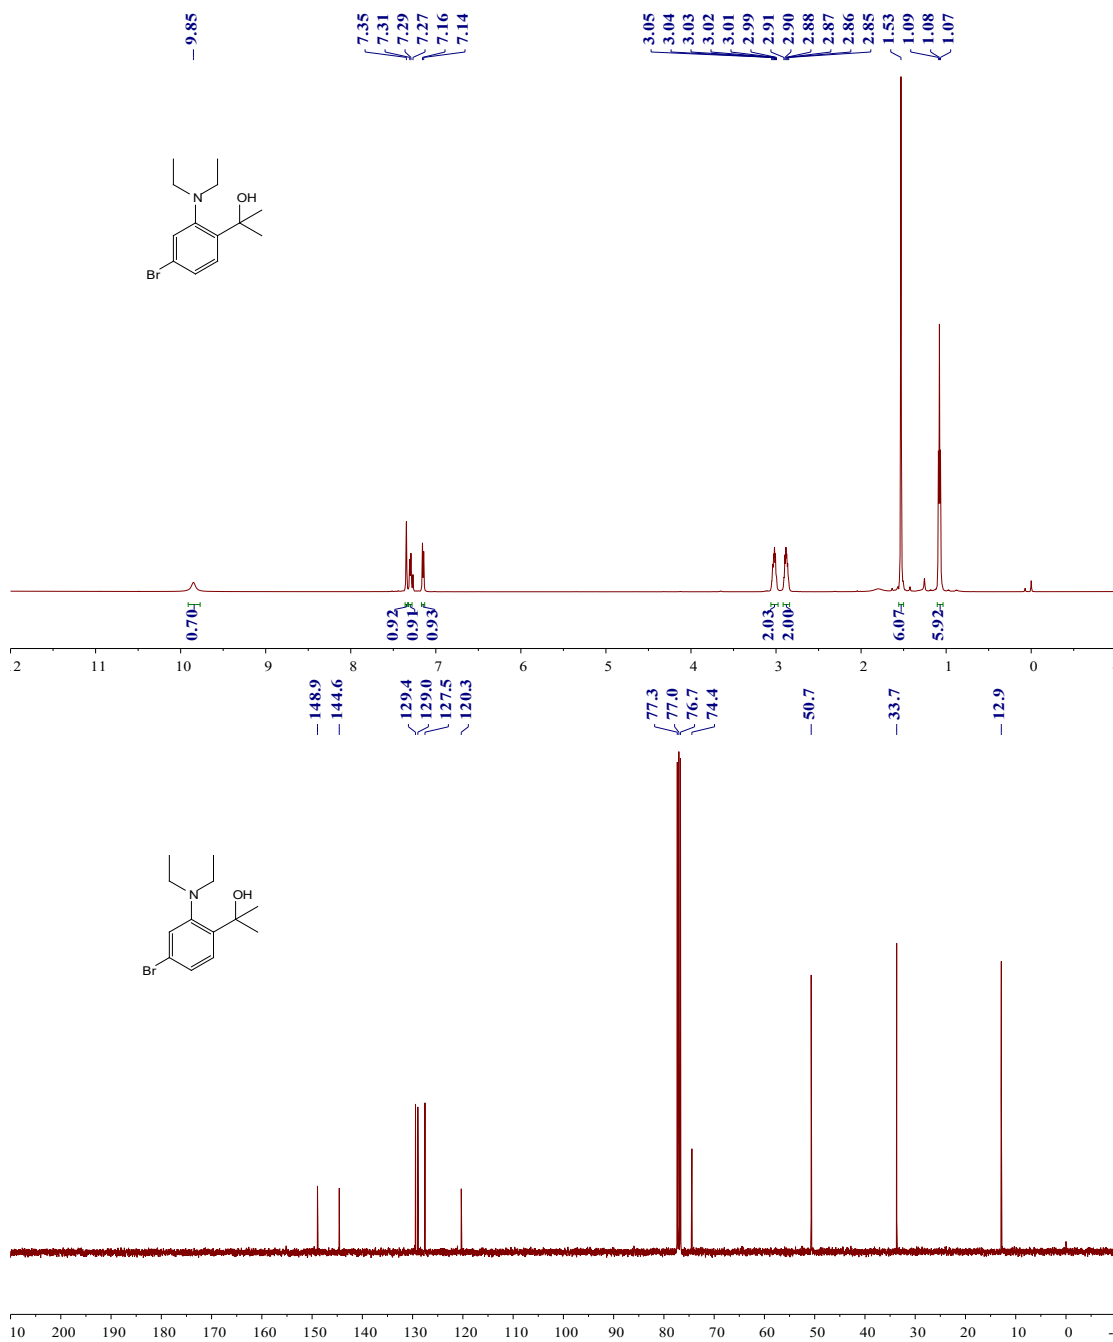

<sup>1</sup>H and <sup>13</sup>C NMR spectra of compound **3ia**

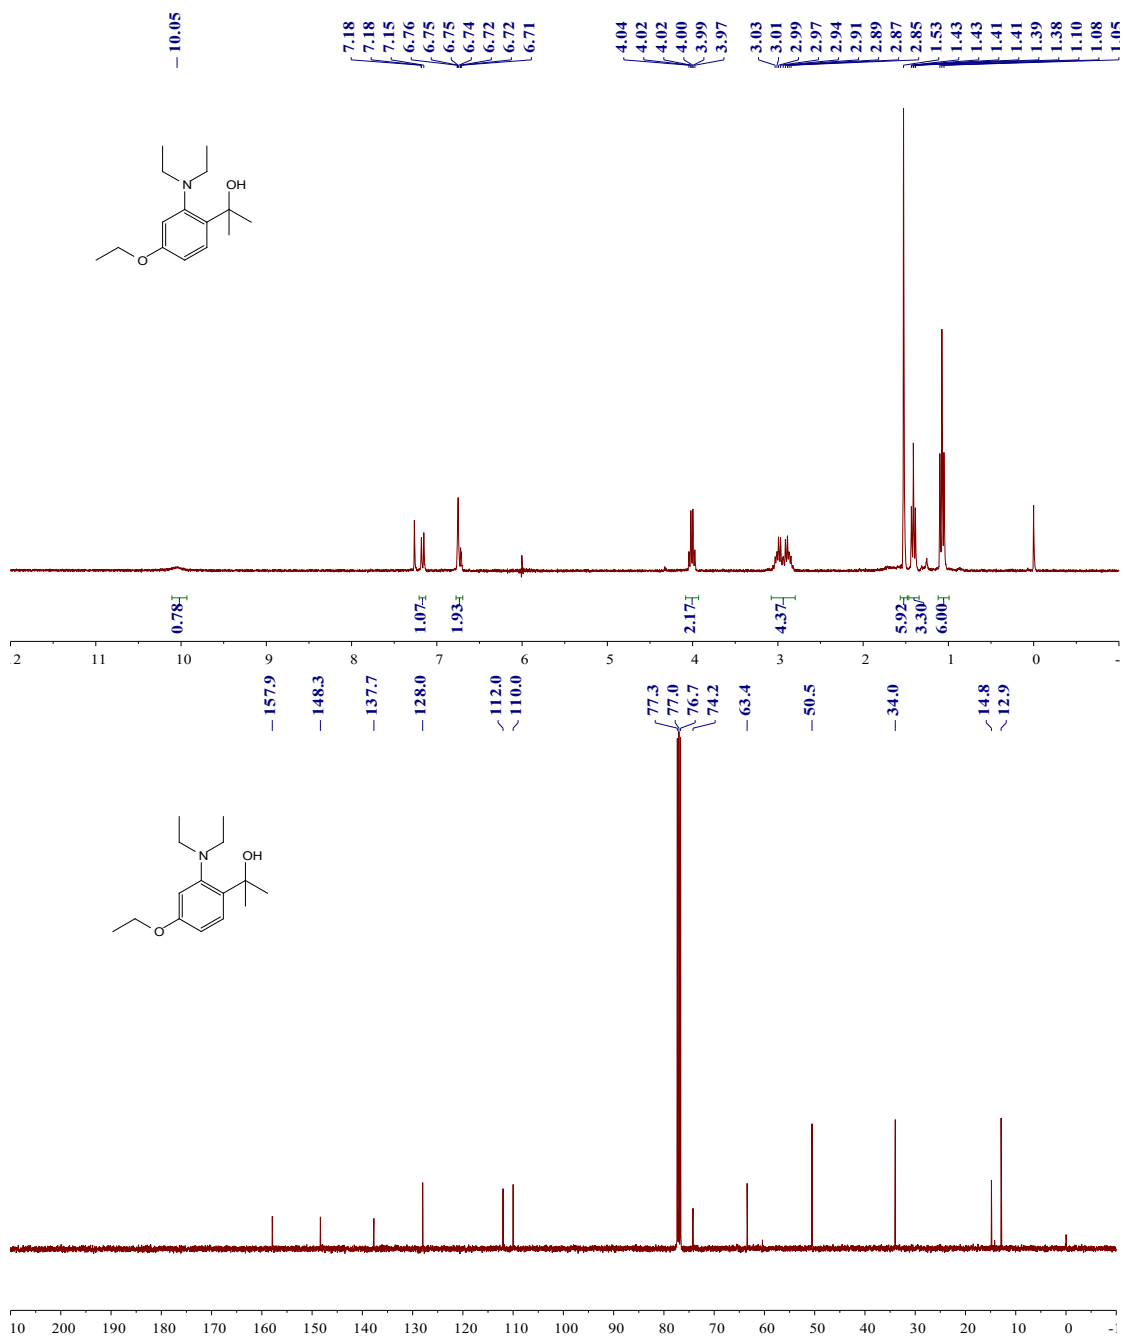

<sup>1</sup>H and <sup>13</sup>C NMR spectra of compound **3ja**

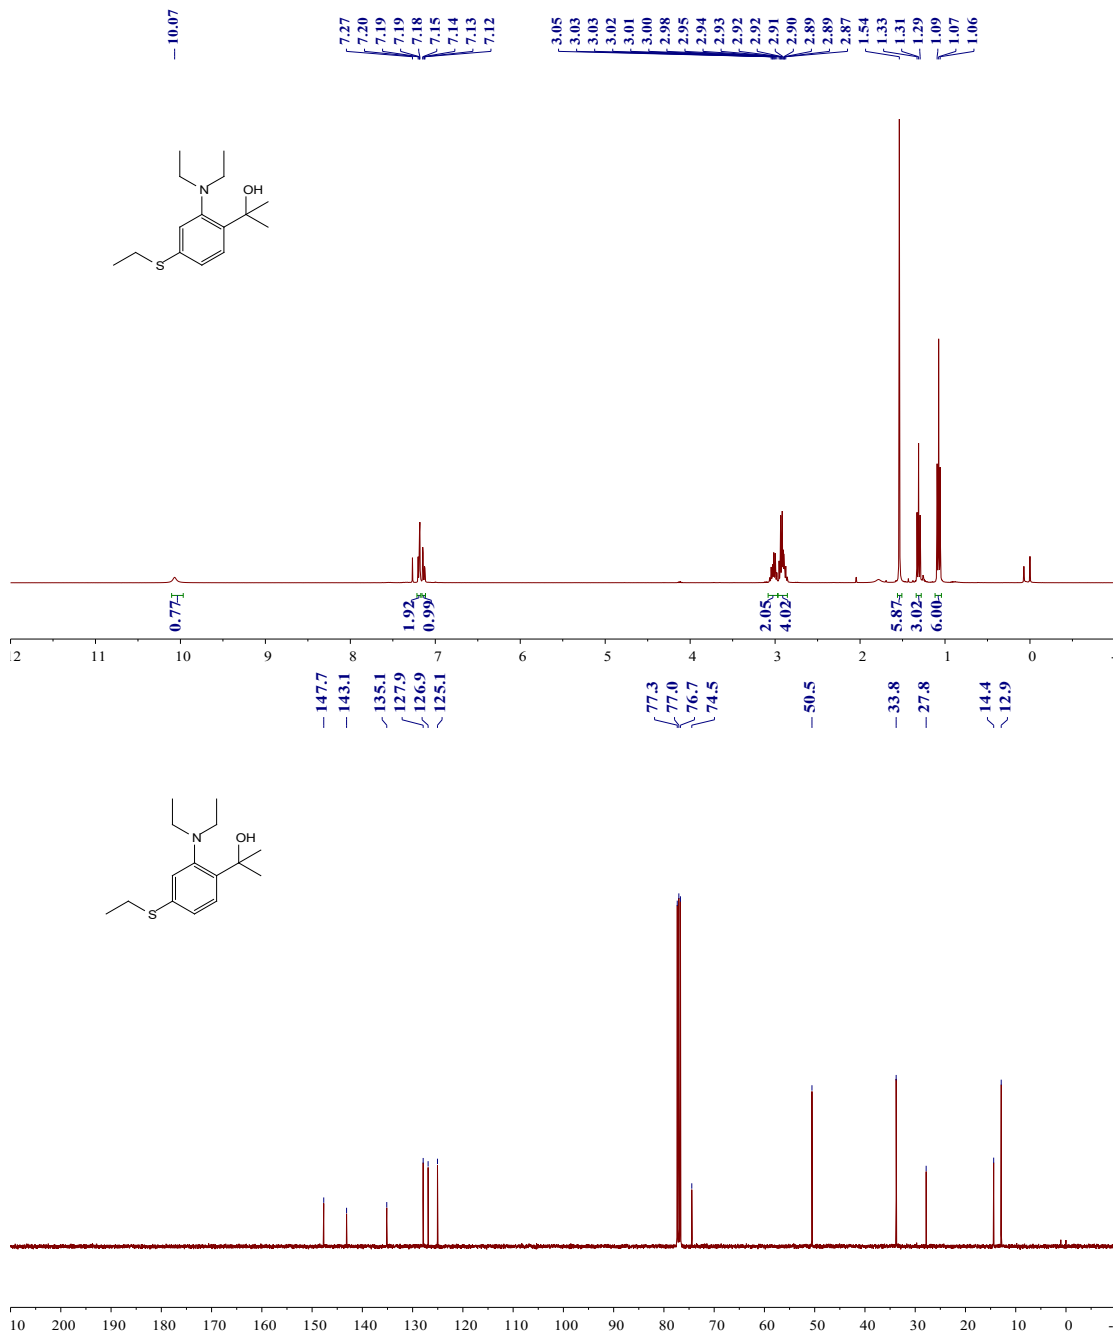

<sup>1</sup>H and <sup>13</sup>C NMR spectra of compound **3ka**

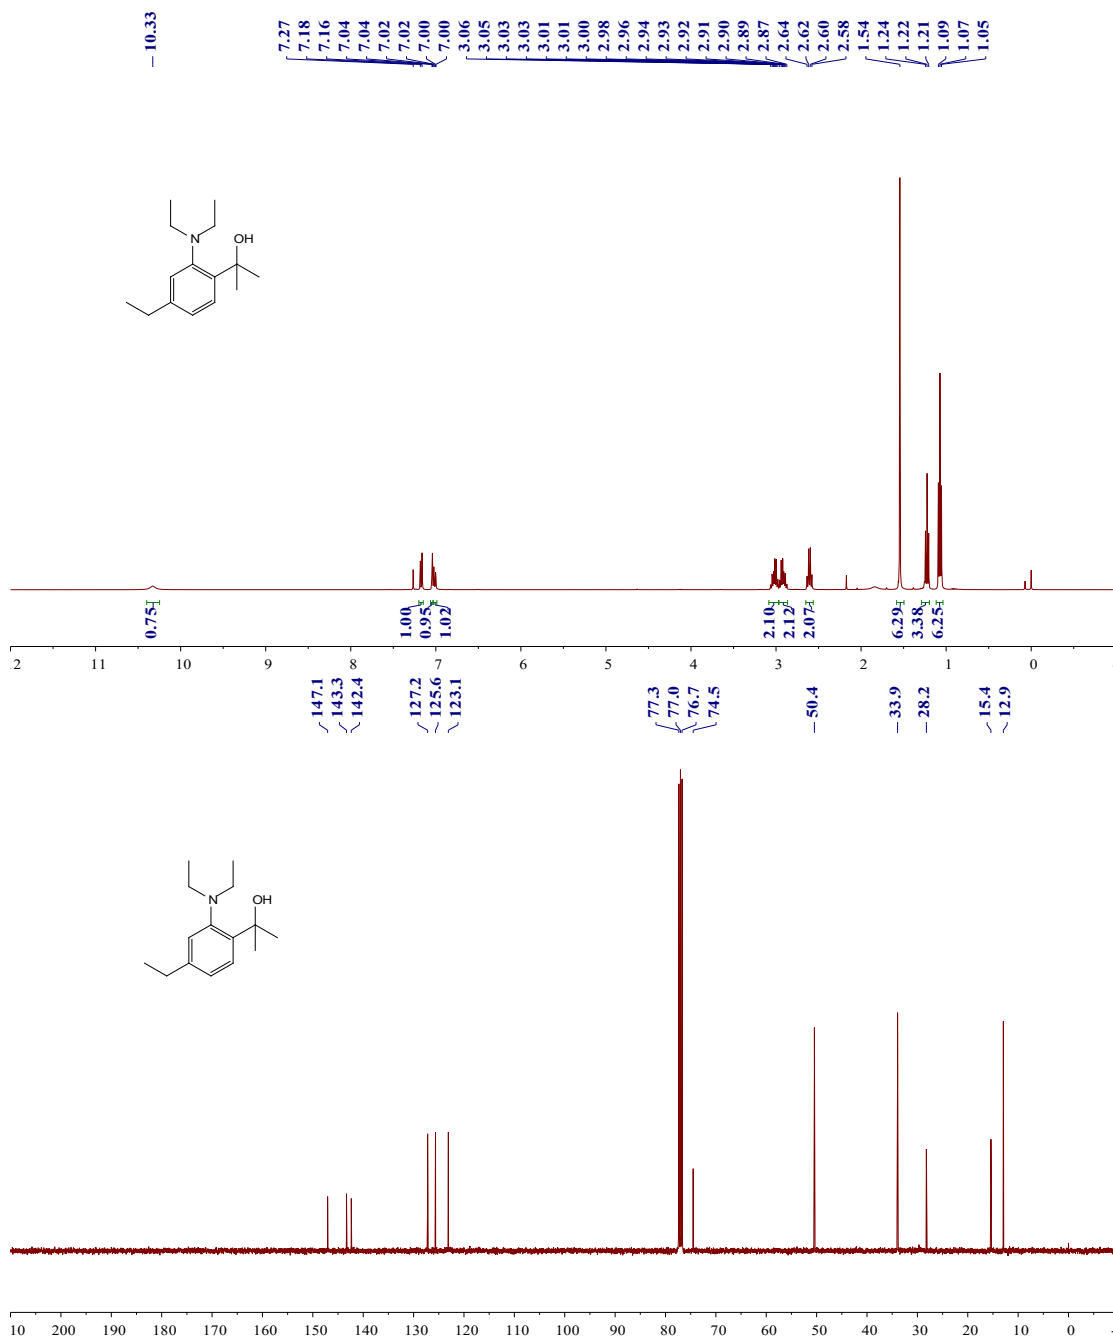

<sup>1</sup>H, <sup>13</sup>C and <sup>19</sup>F NMR spectra of compound **3la**



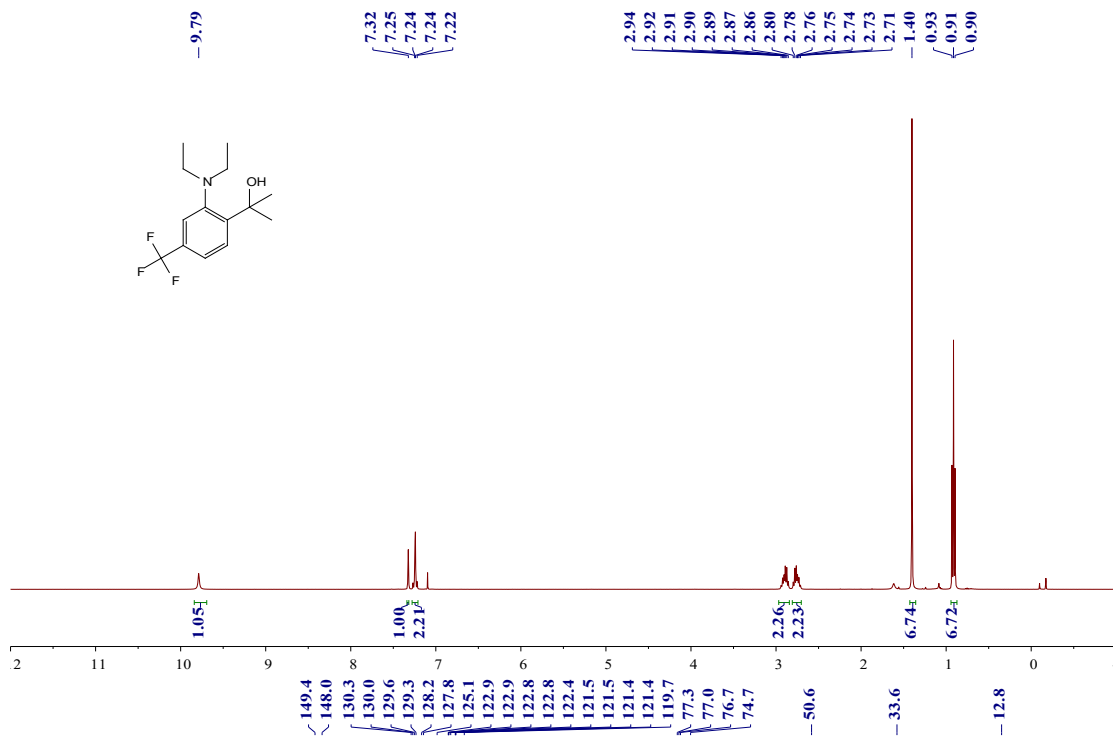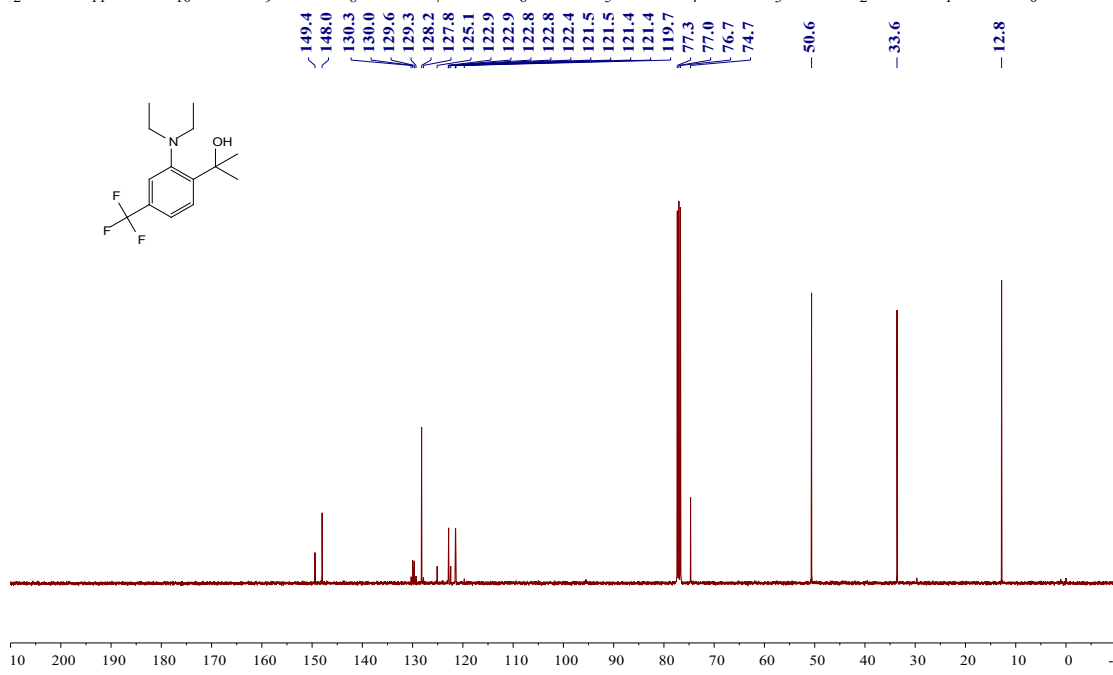

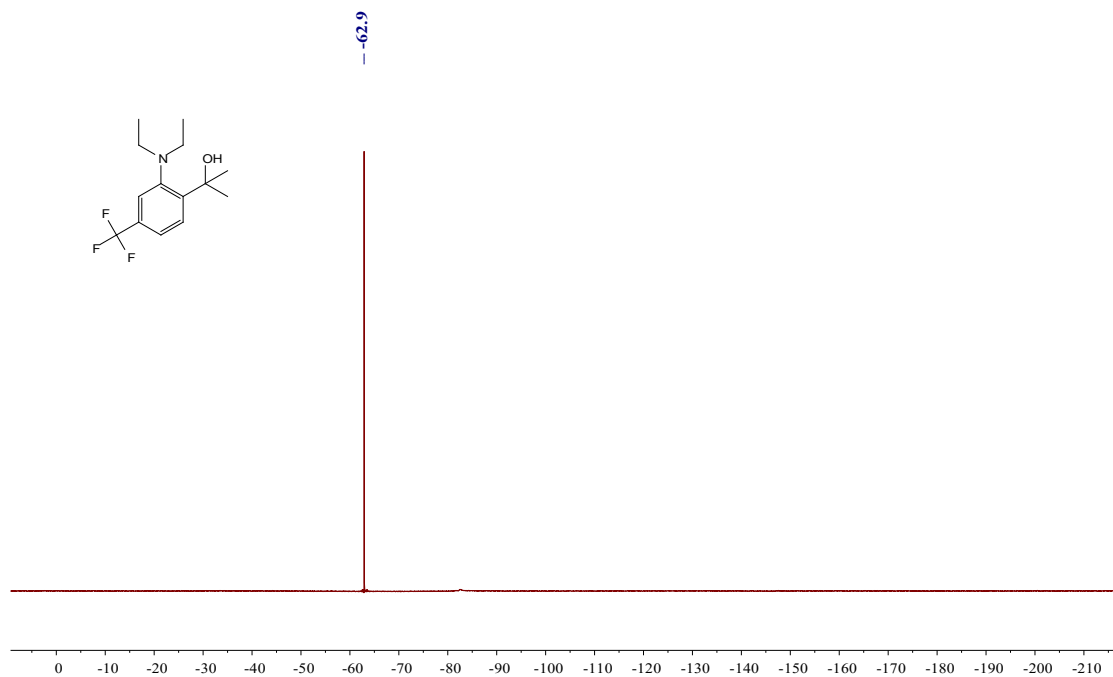

$^1\text{H}$  and  $^{13}\text{C}$  NMR spectra of compound **3ma**

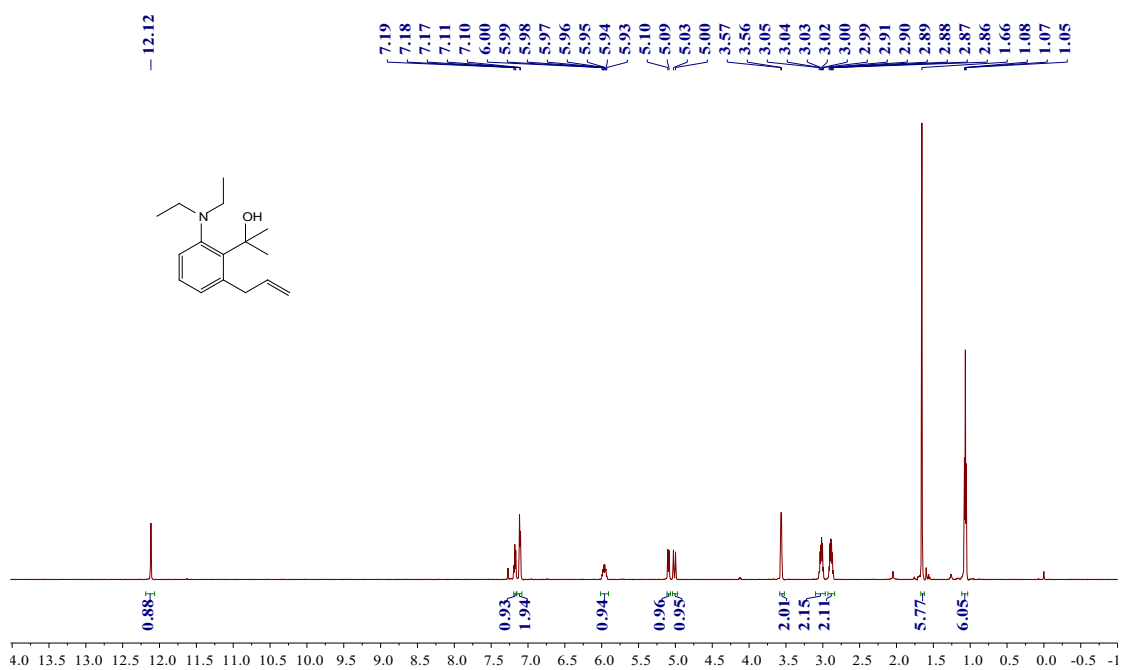

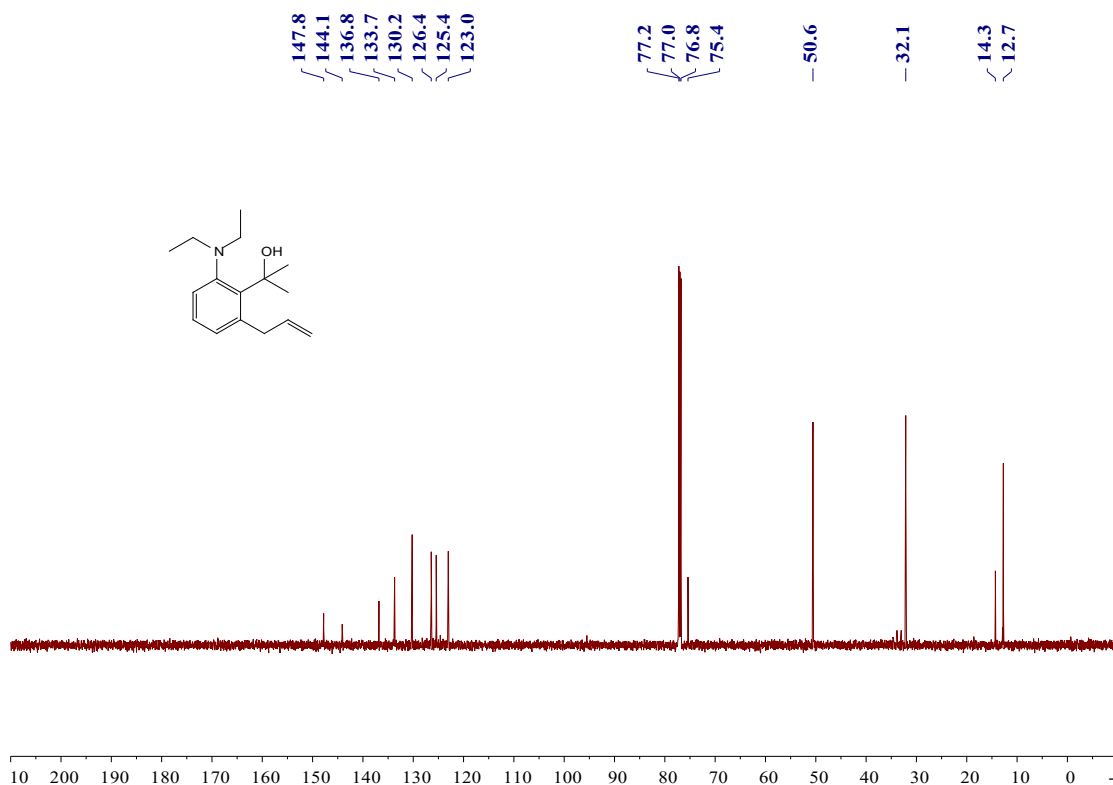

<sup>1</sup>H and <sup>13</sup>C NMR spectra of compound **1n**

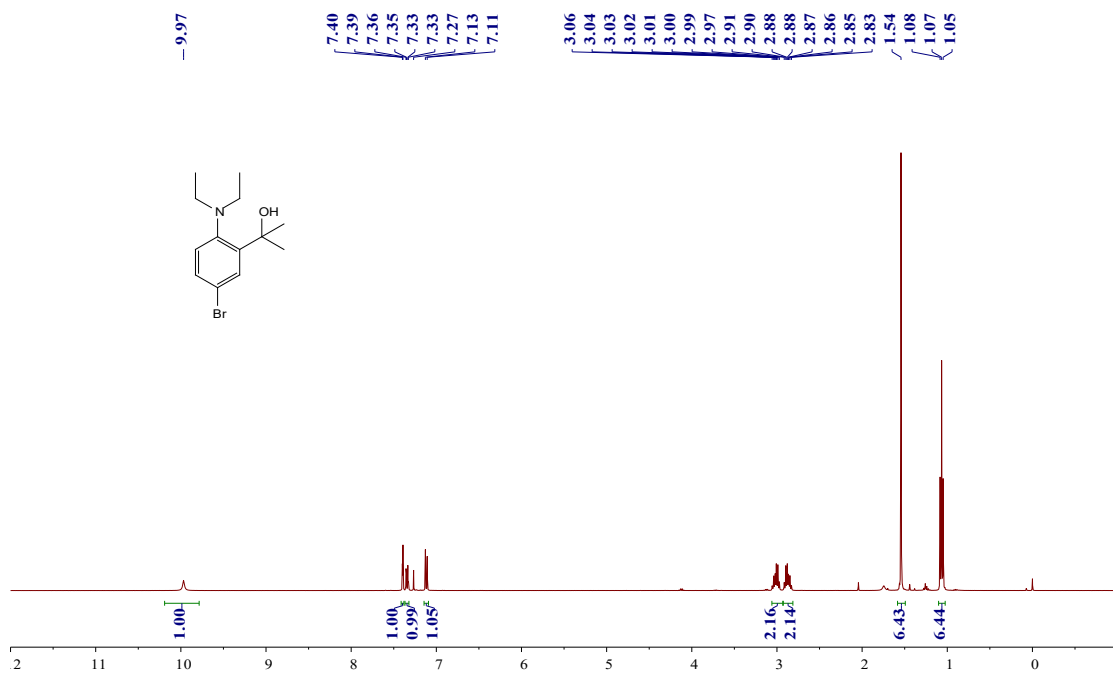

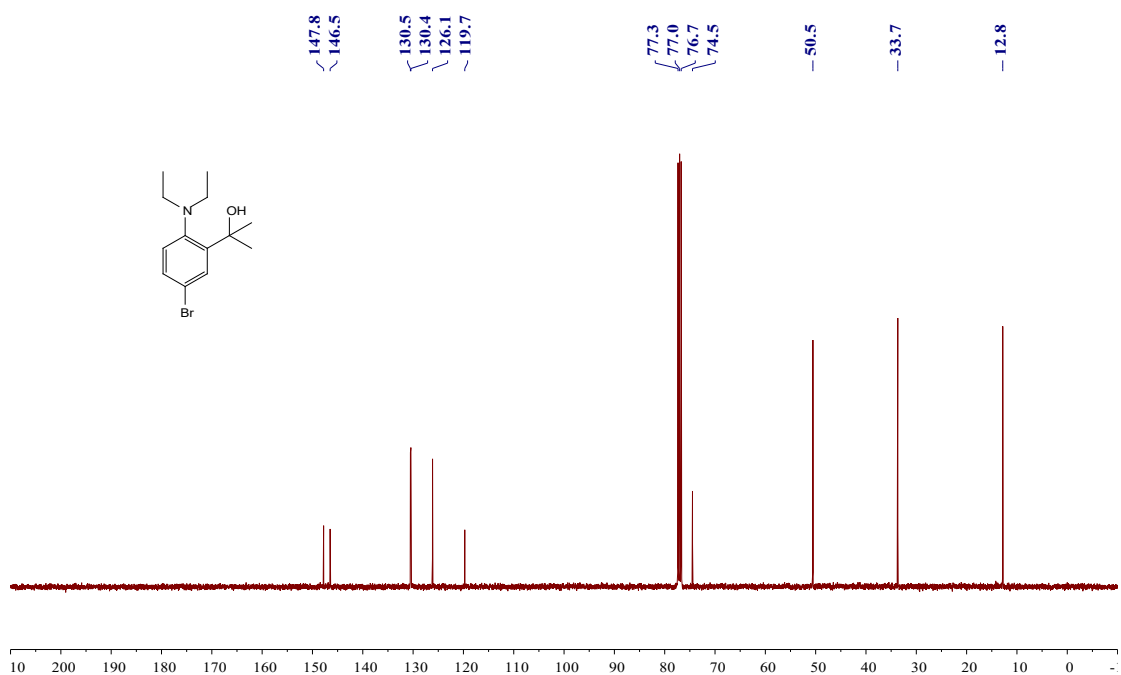

$^1\text{H}$  and  $^{13}\text{C}$  NMR spectra of compound 3ab

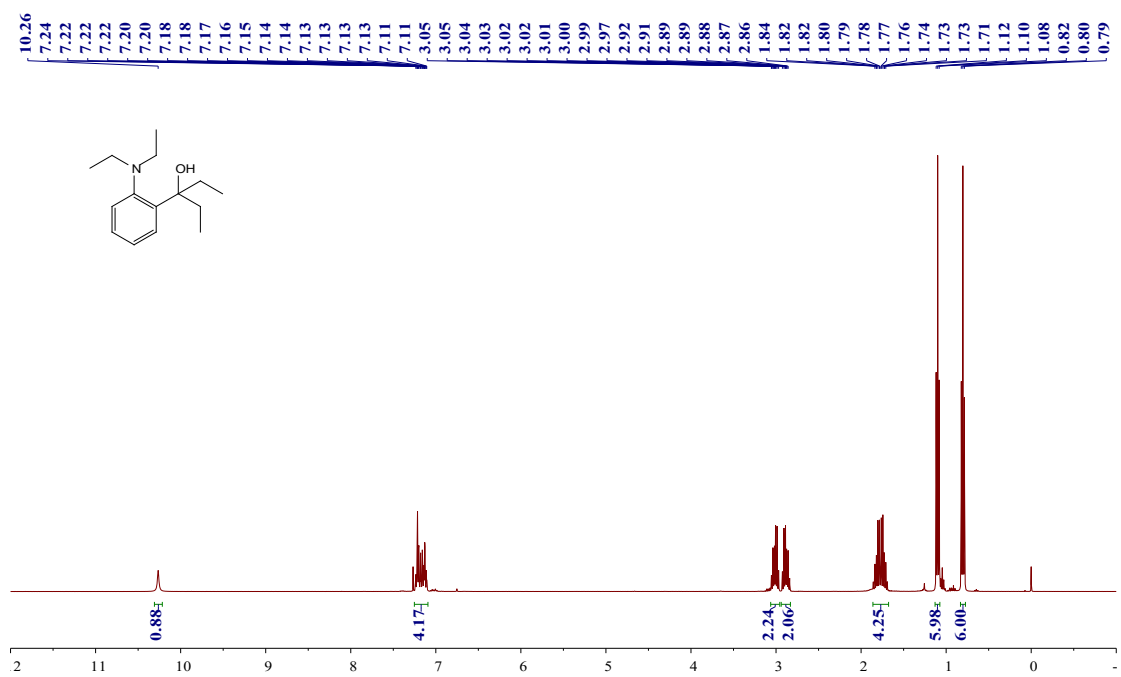

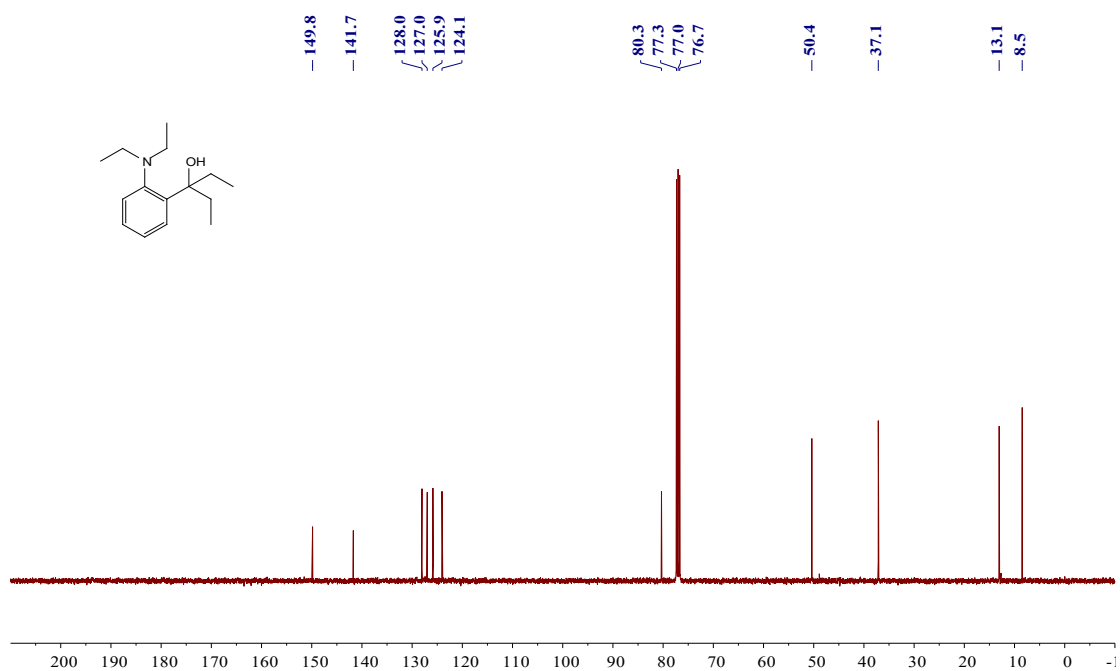

$^1\text{H}$  and  $^{13}\text{C}$  NMR spectra of compound **3ac**

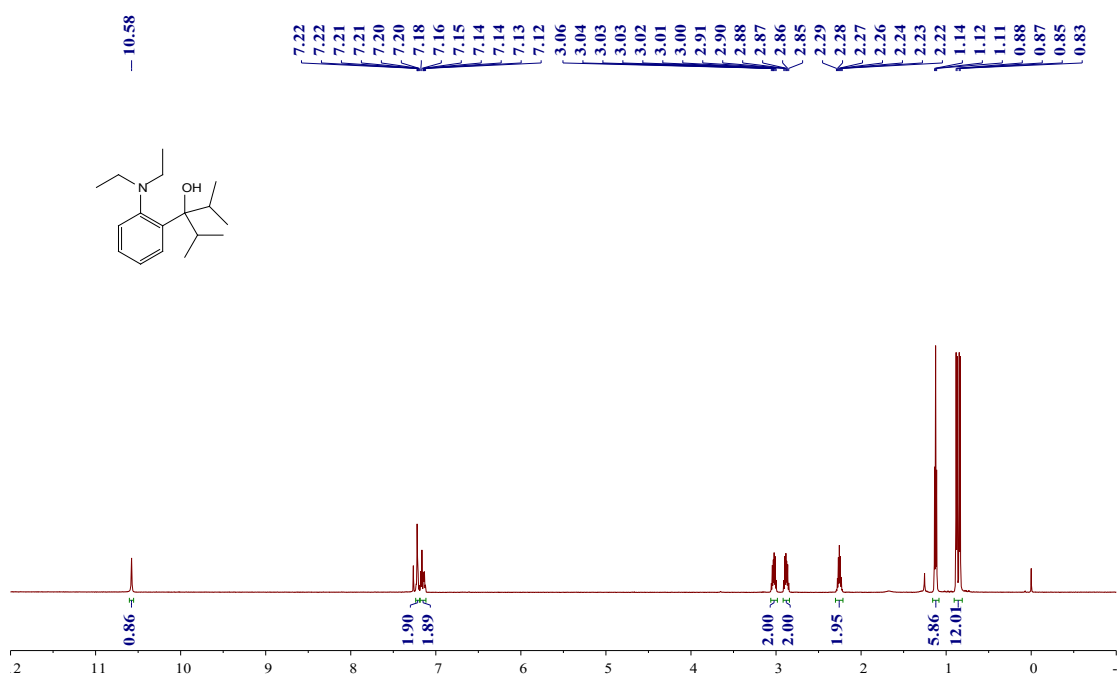

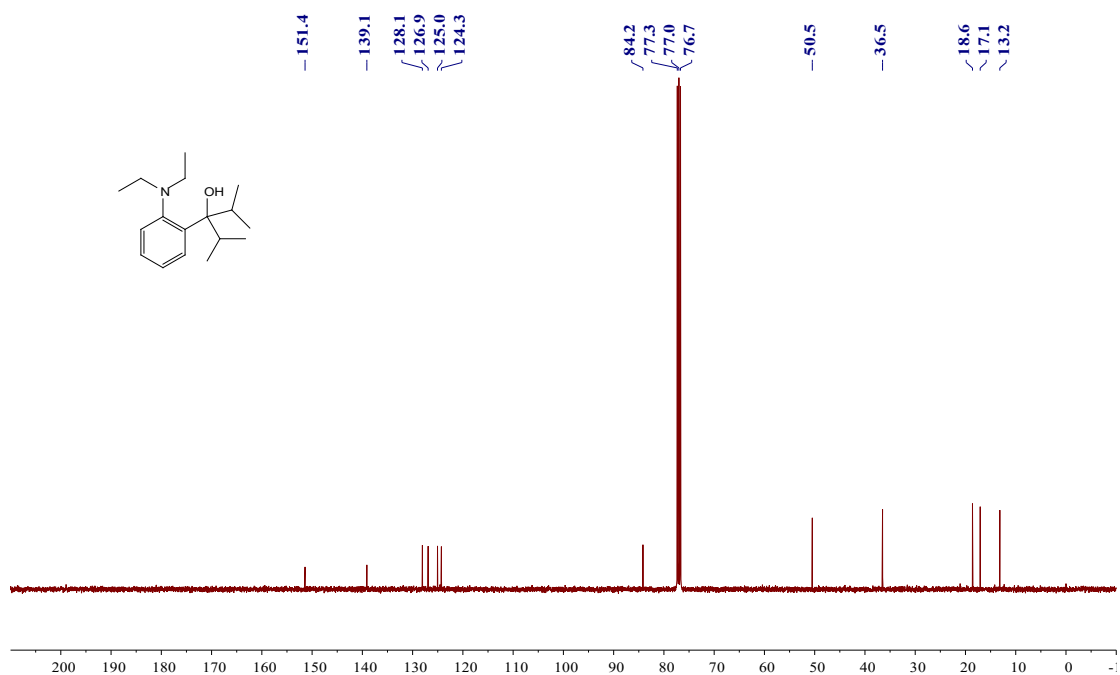

<sup>1</sup>H and <sup>13</sup>C NMR spectra of compound **3ad**

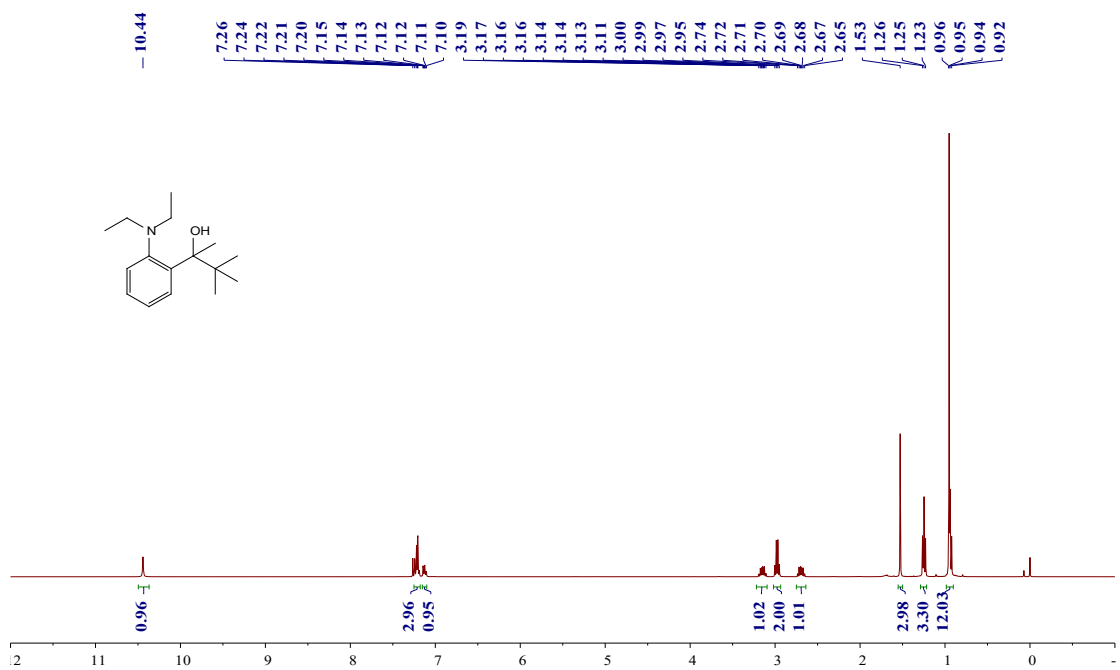

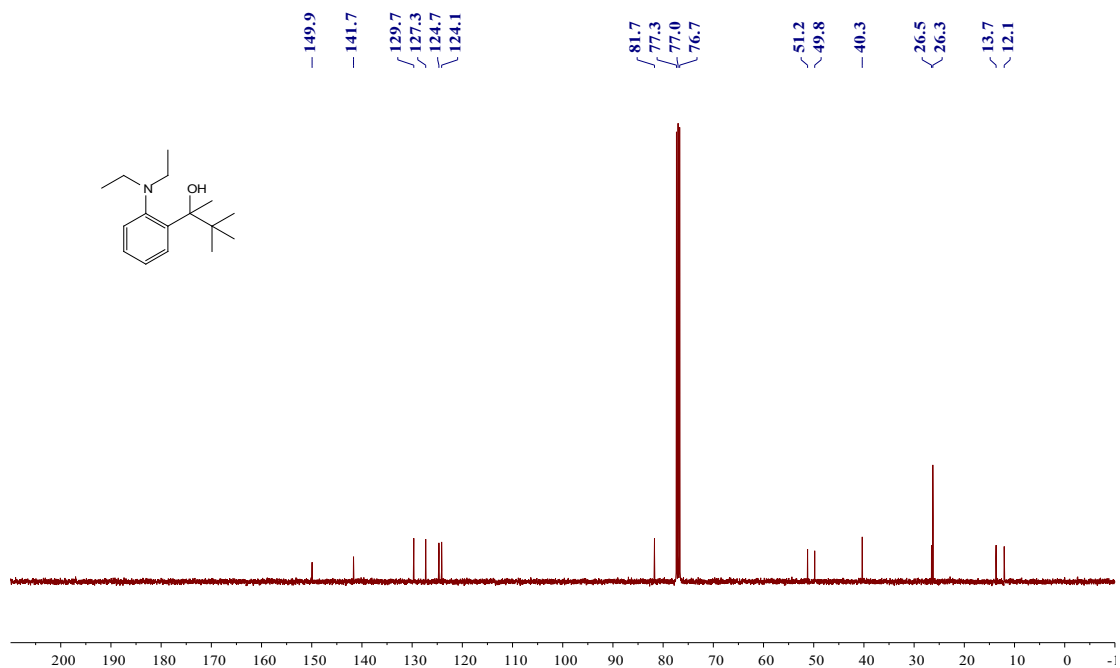

<sup>1</sup>H and <sup>13</sup>C NMR spectra of compound **3ae**

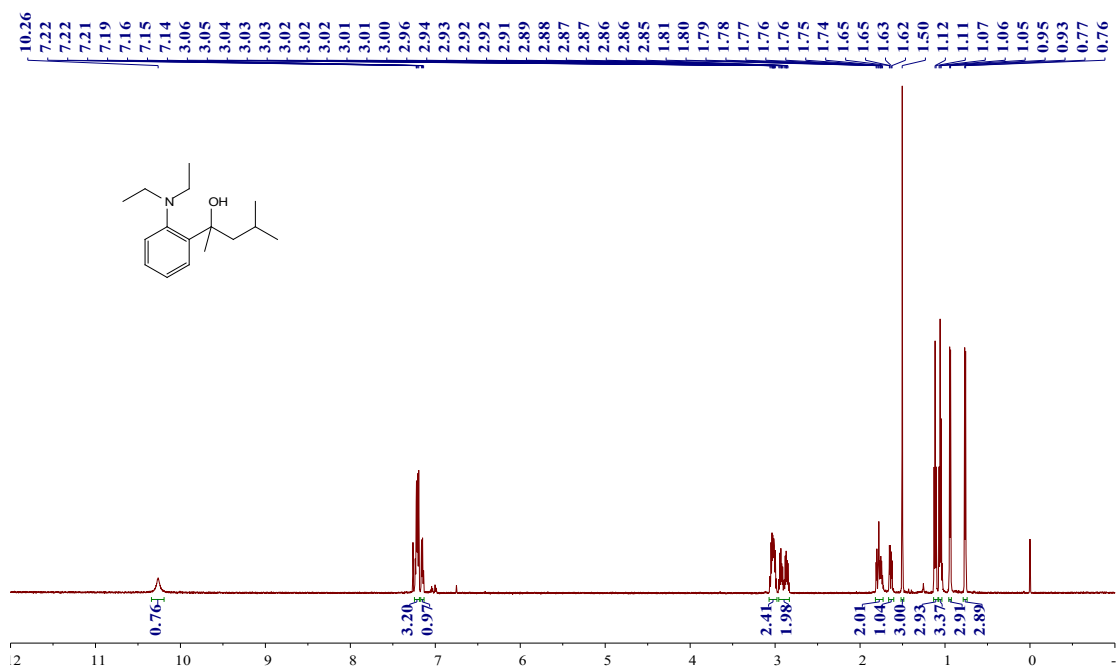

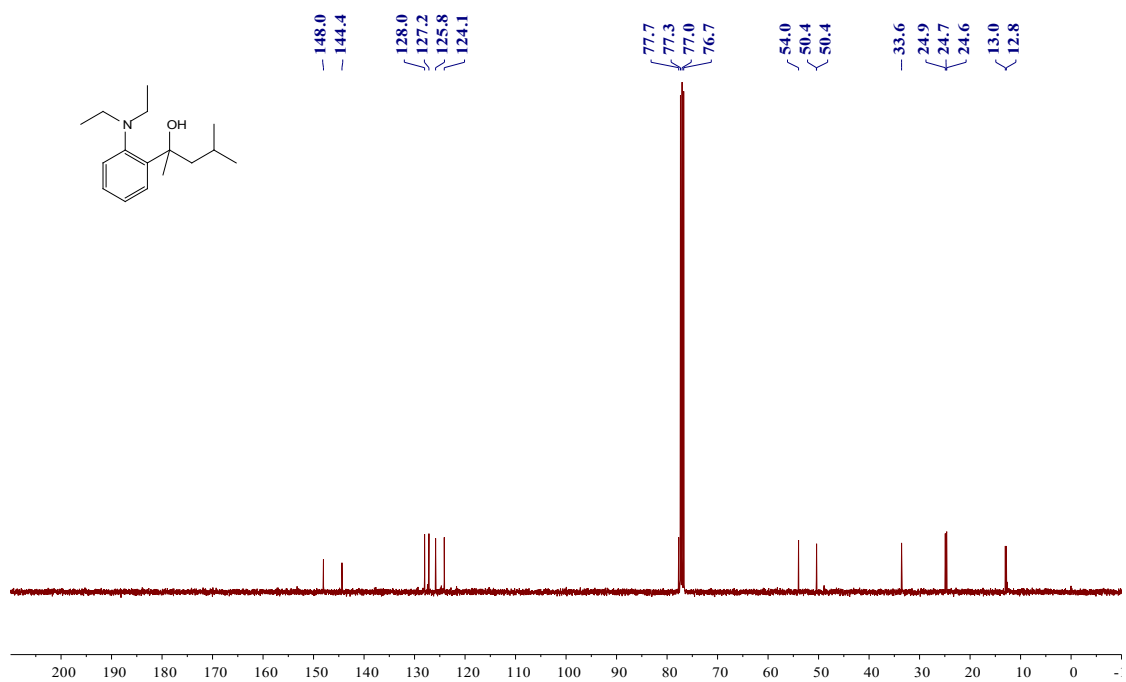

<sup>1</sup>H and <sup>13</sup>C NMR spectra of compound 3af

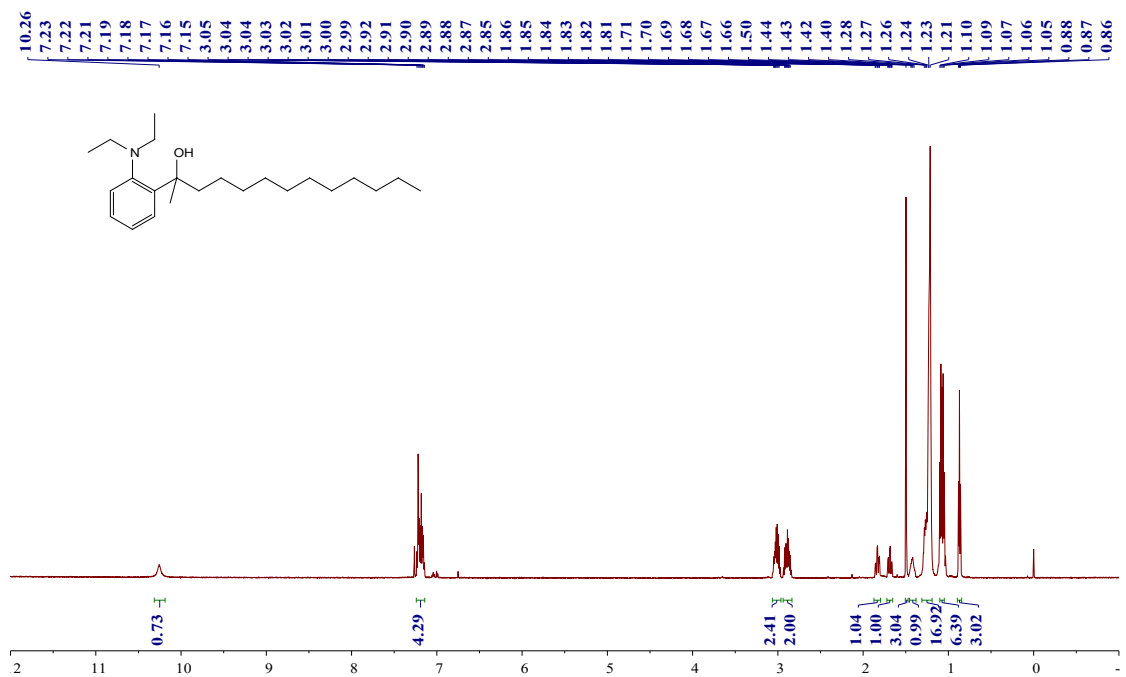



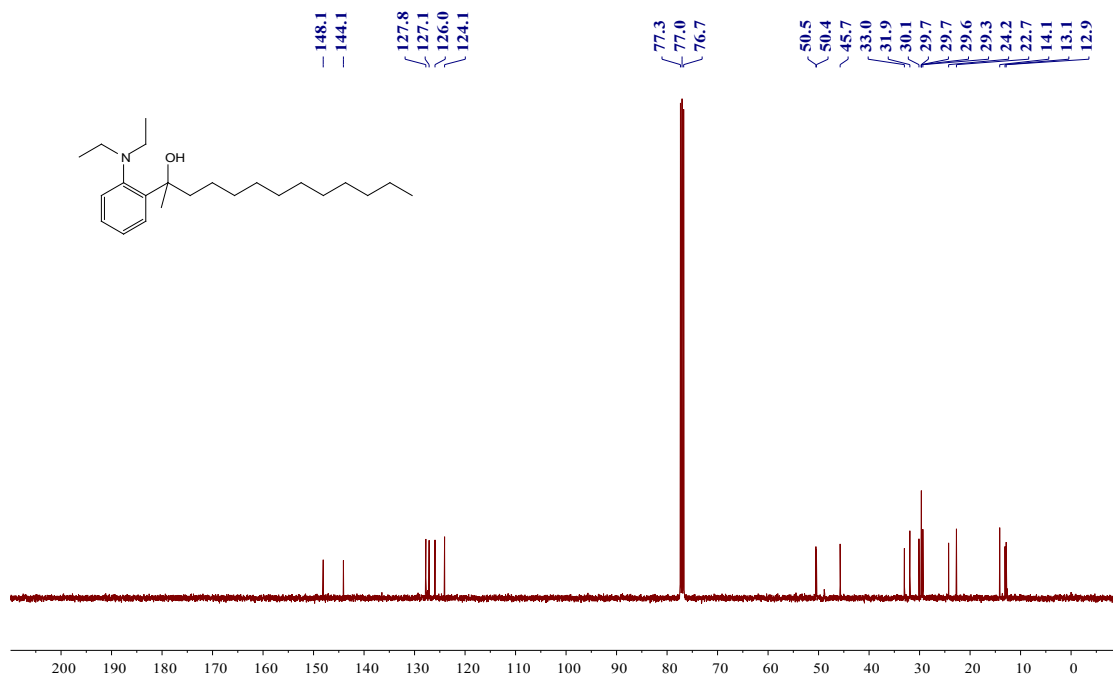

<sup>1</sup>H and <sup>13</sup>C NMR spectra of compound 3ag

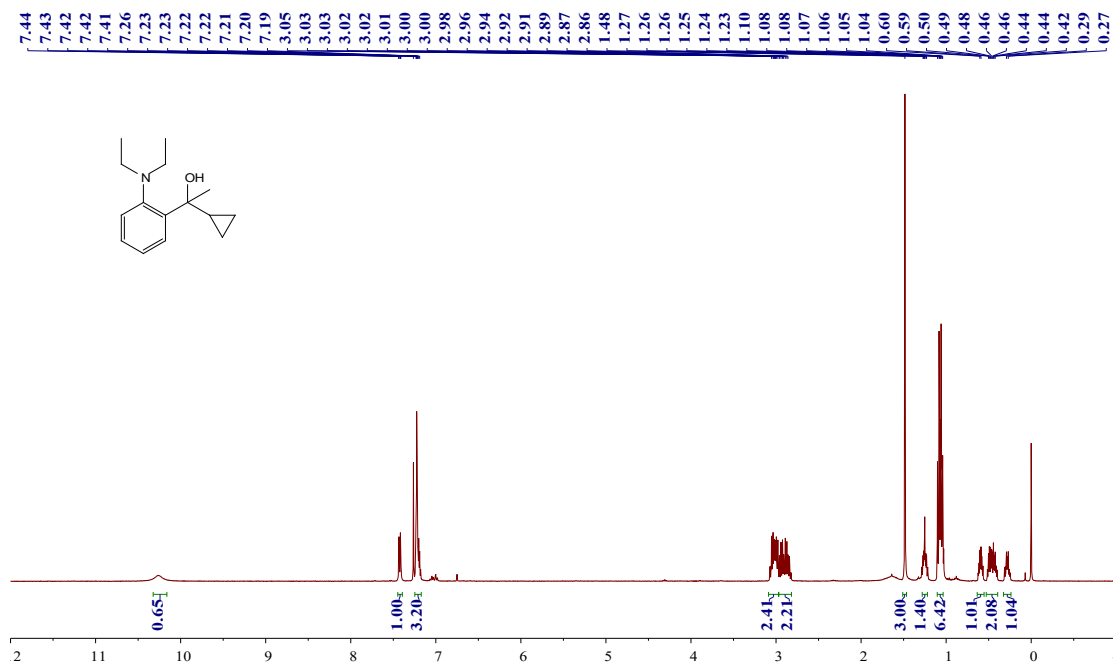

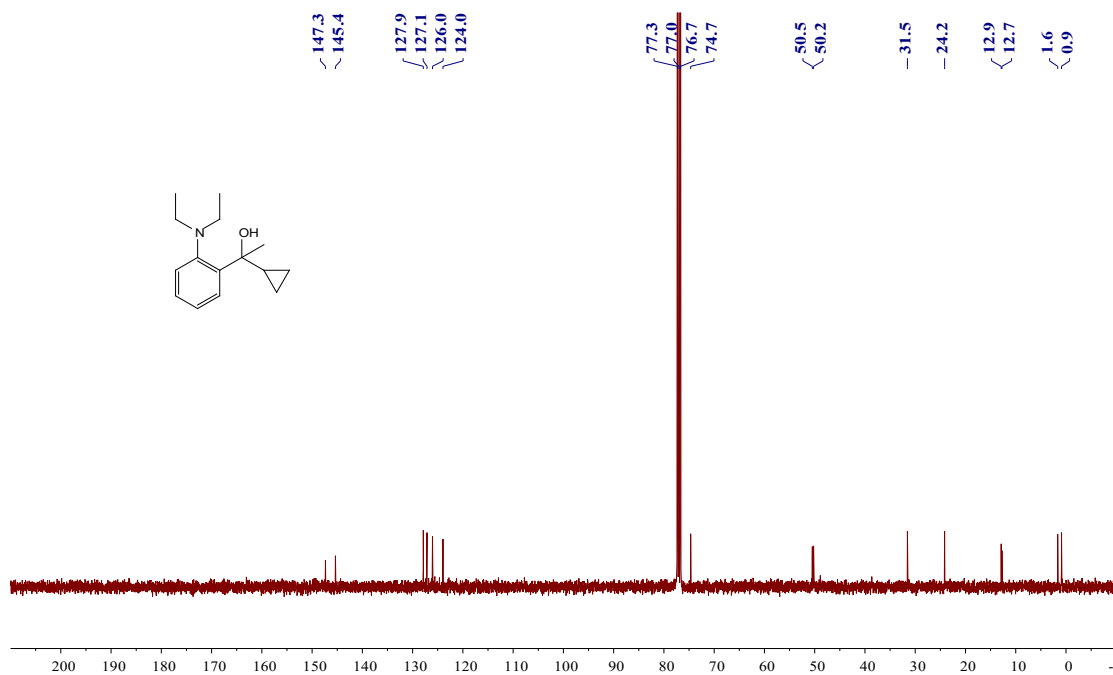

<sup>1</sup>H and <sup>13</sup>C NMR spectra of compound 3ah

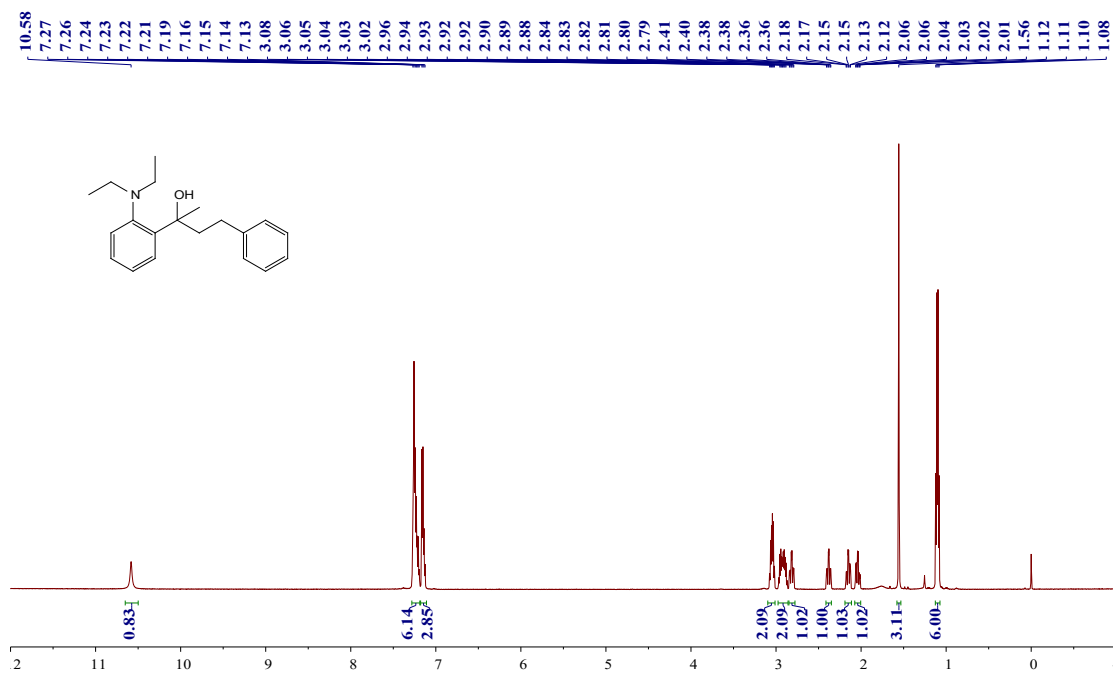

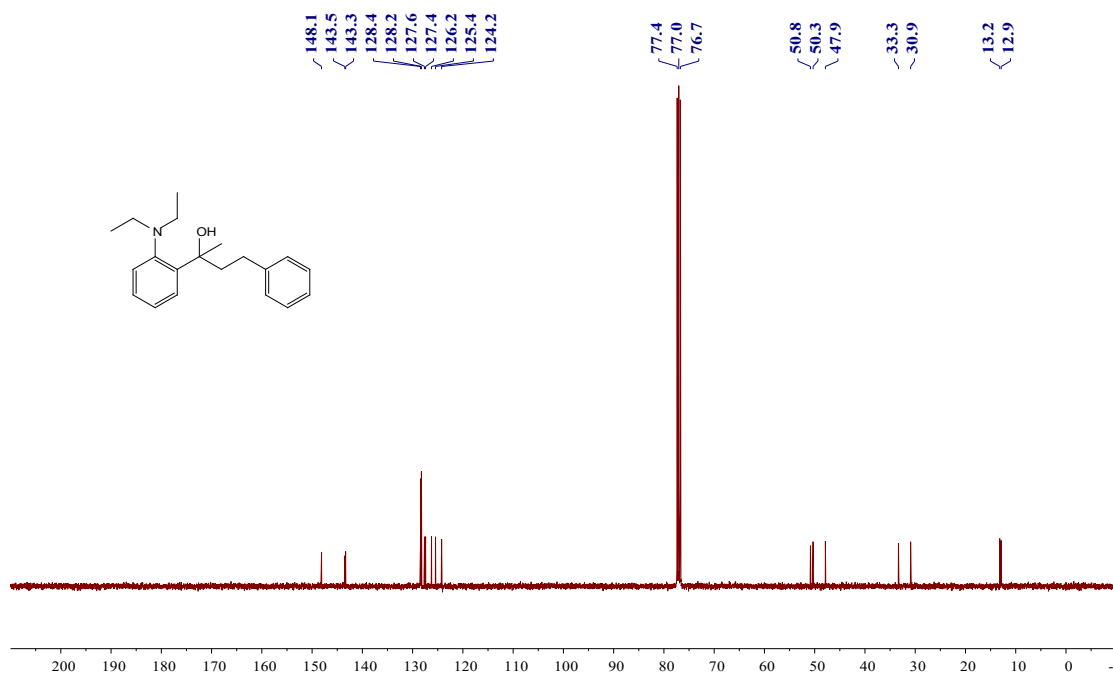

<sup>1</sup>H and <sup>13</sup>C NMR spectra of compound 3ai

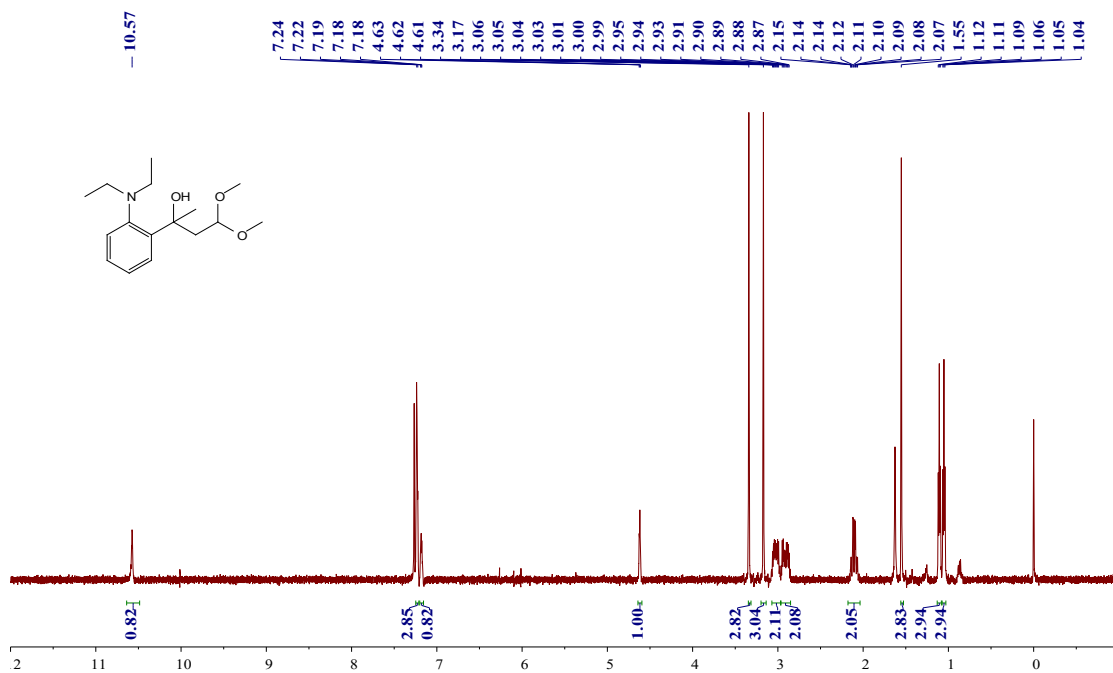

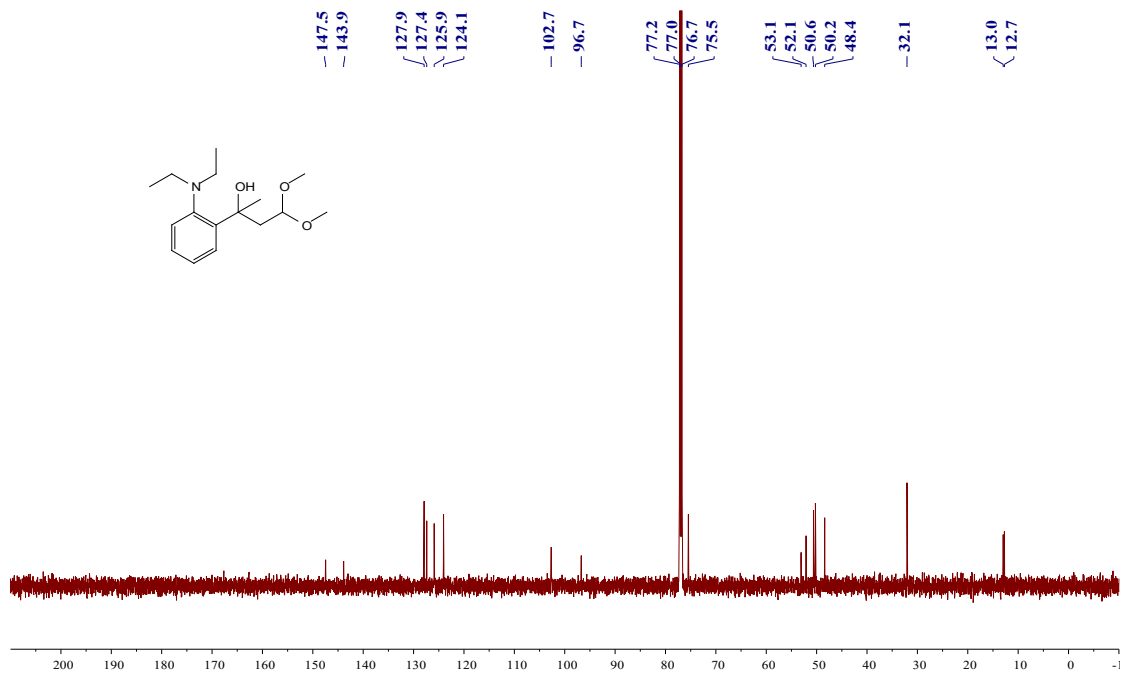

<sup>1</sup>H and <sup>13</sup>C NMR spectra of compound 3aj

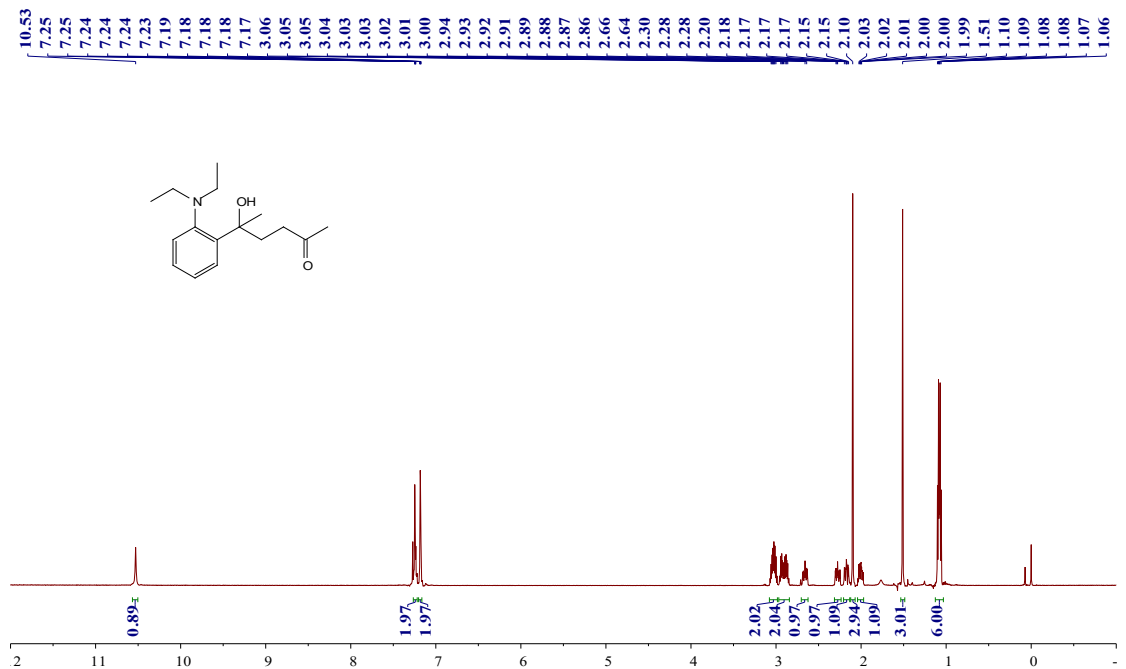

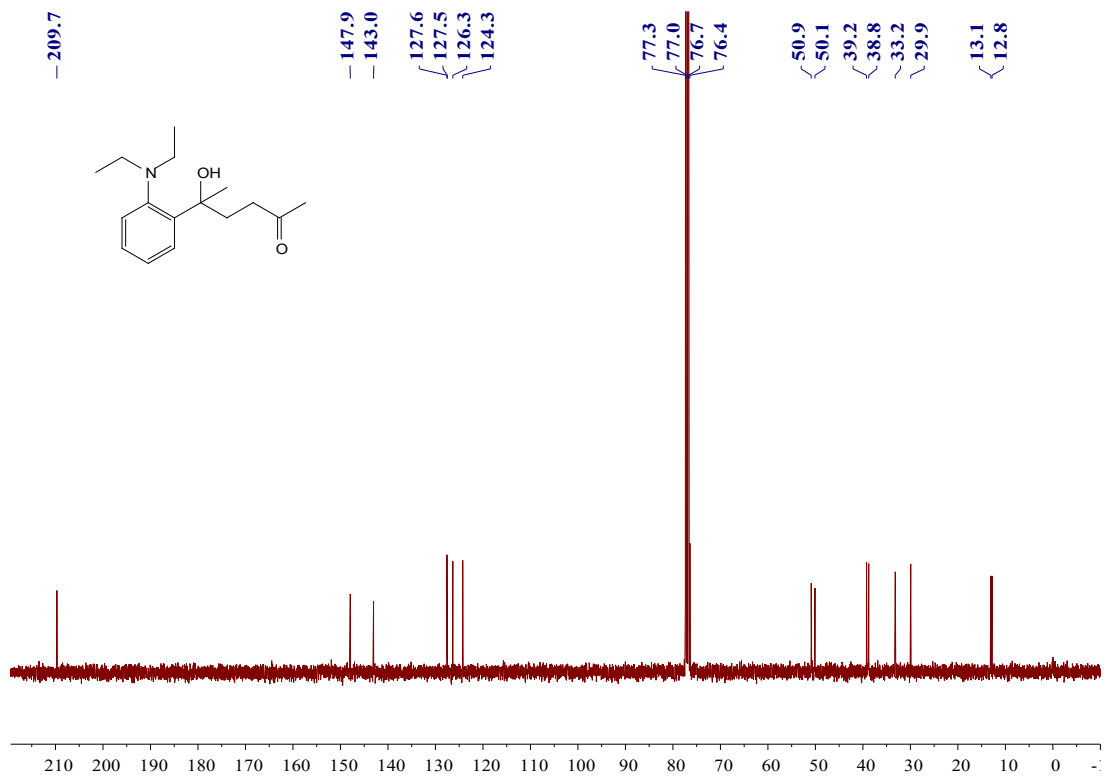

**<sup>1</sup>H and <sup>13</sup>C NMR spectra of compound 3ak**

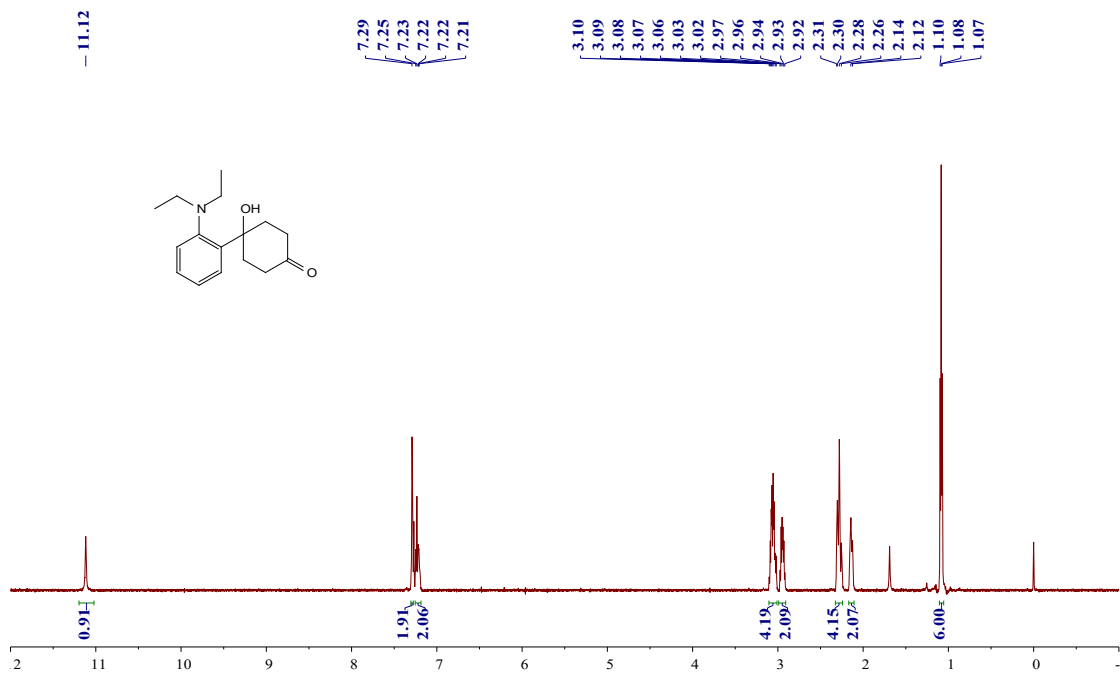

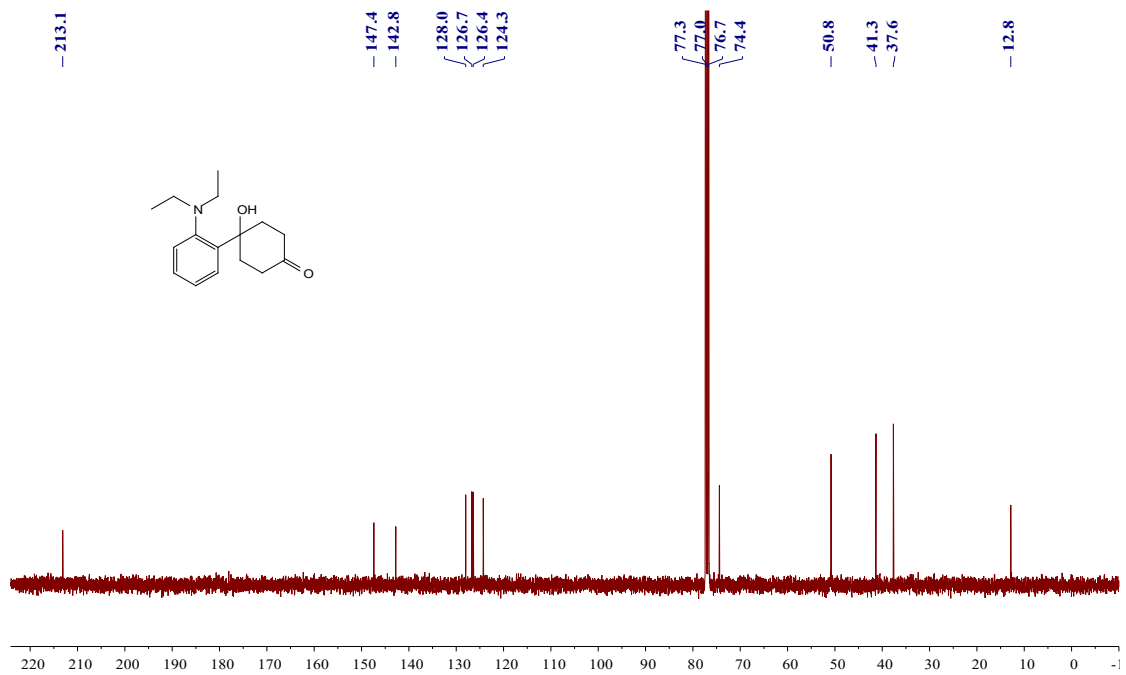

<sup>1</sup>H and <sup>13</sup>C NMR spectra of compound 3al

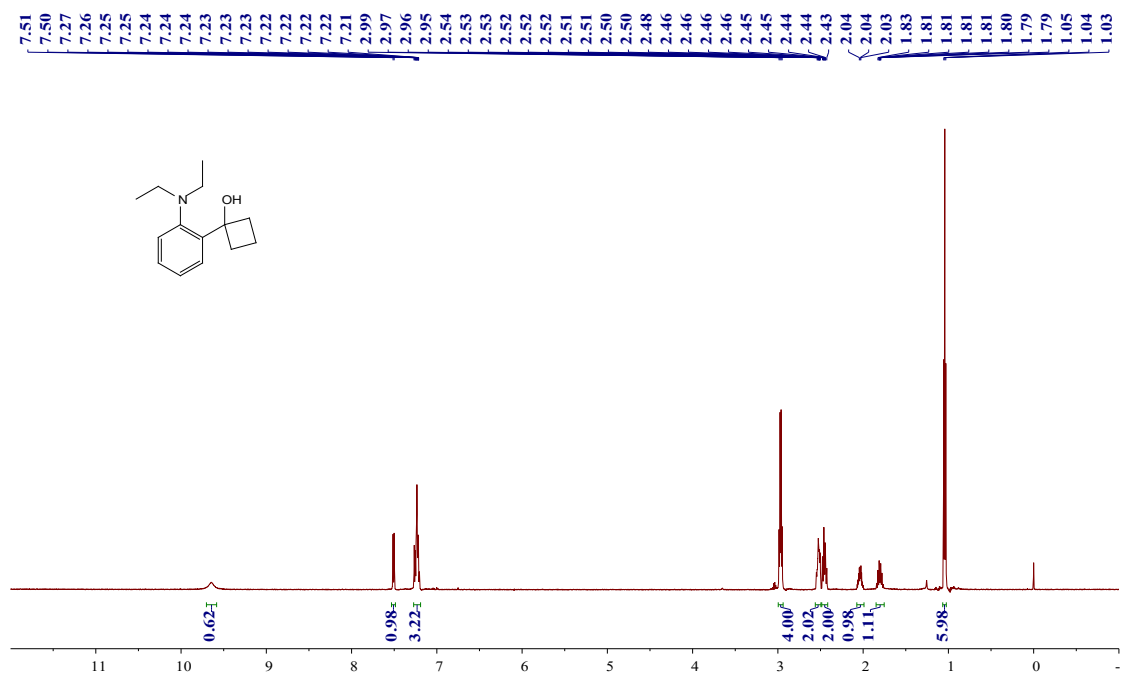

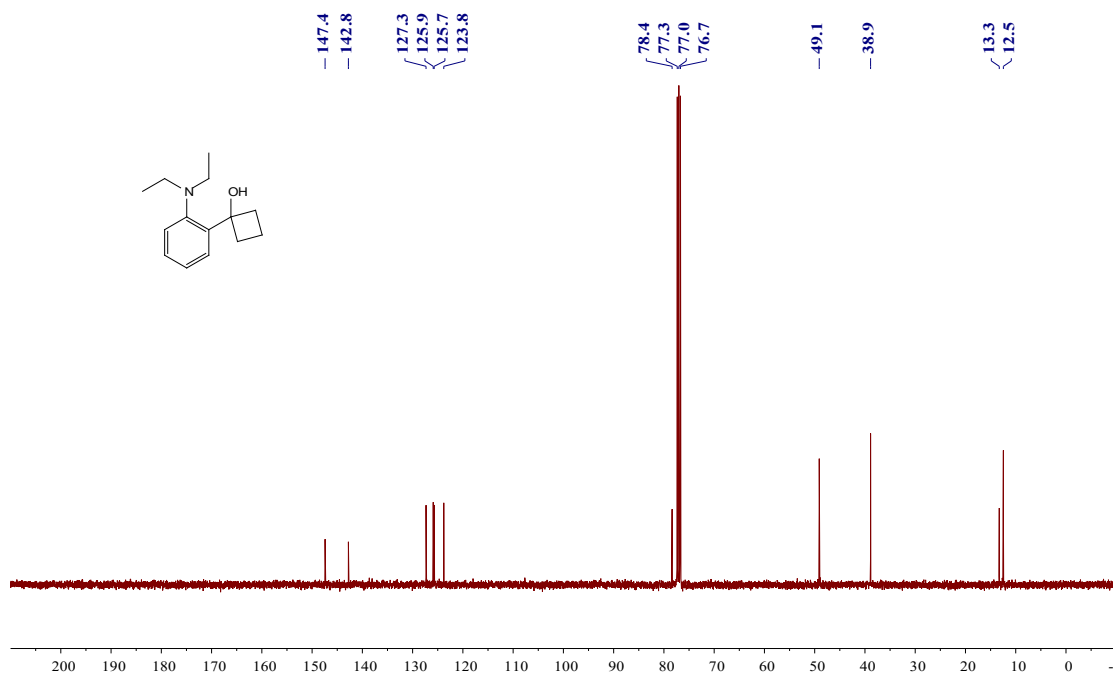

<sup>1</sup>H and <sup>13</sup>C NMR spectra of compound **3am**

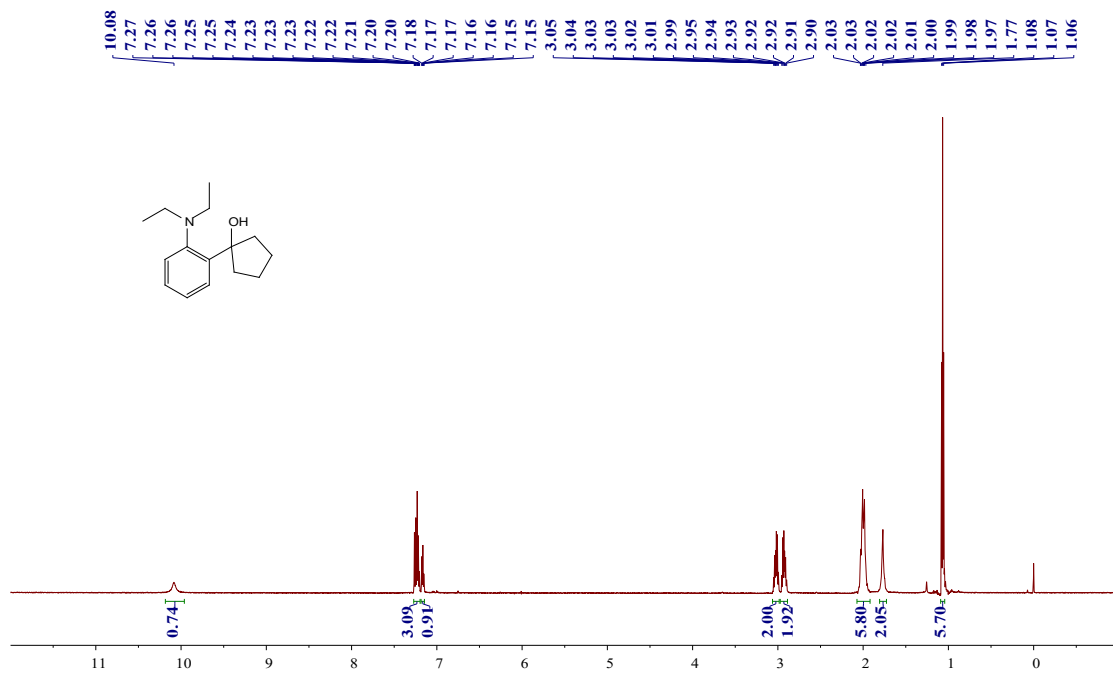

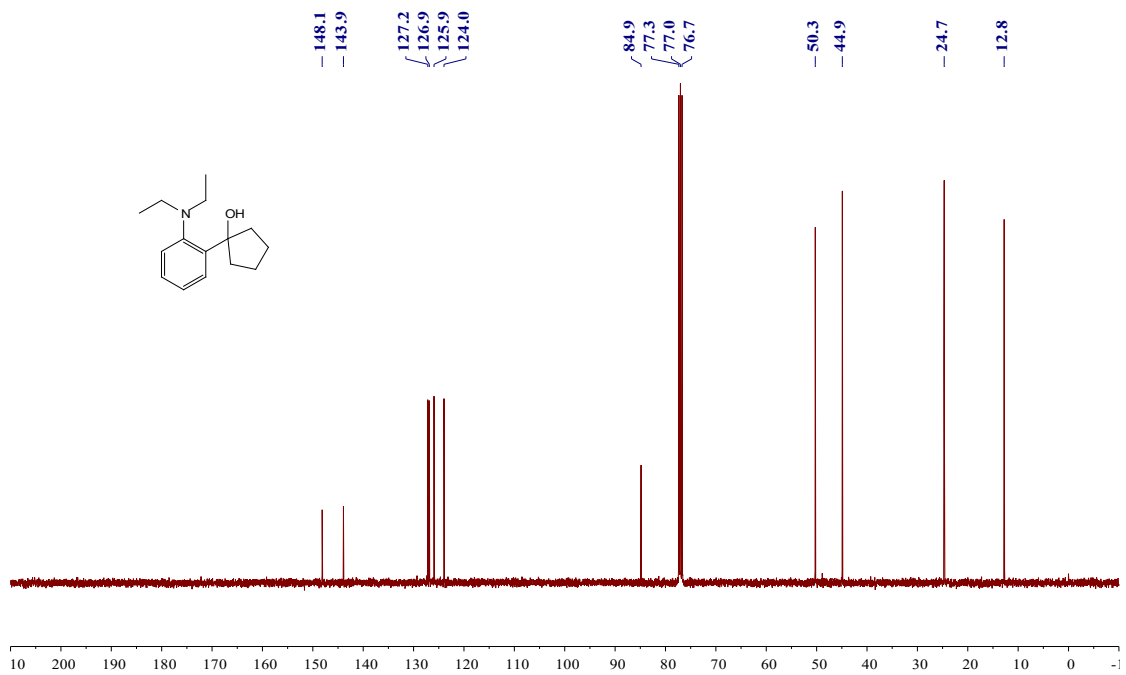

**<sup>1</sup>H and <sup>13</sup>C NMR spectra of compound 3an**

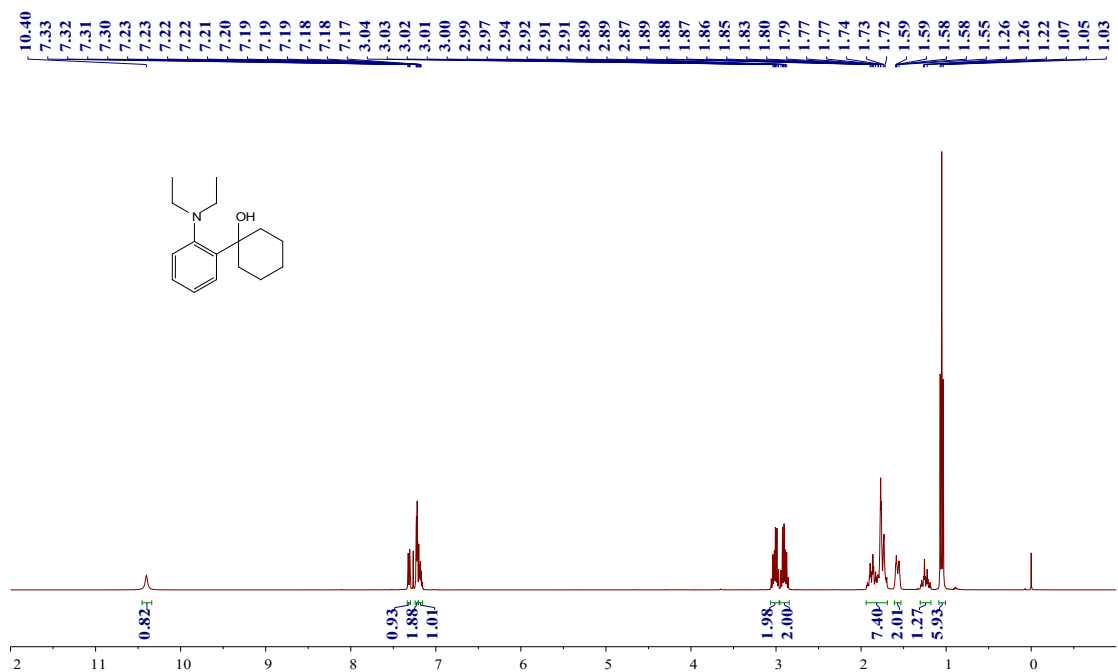



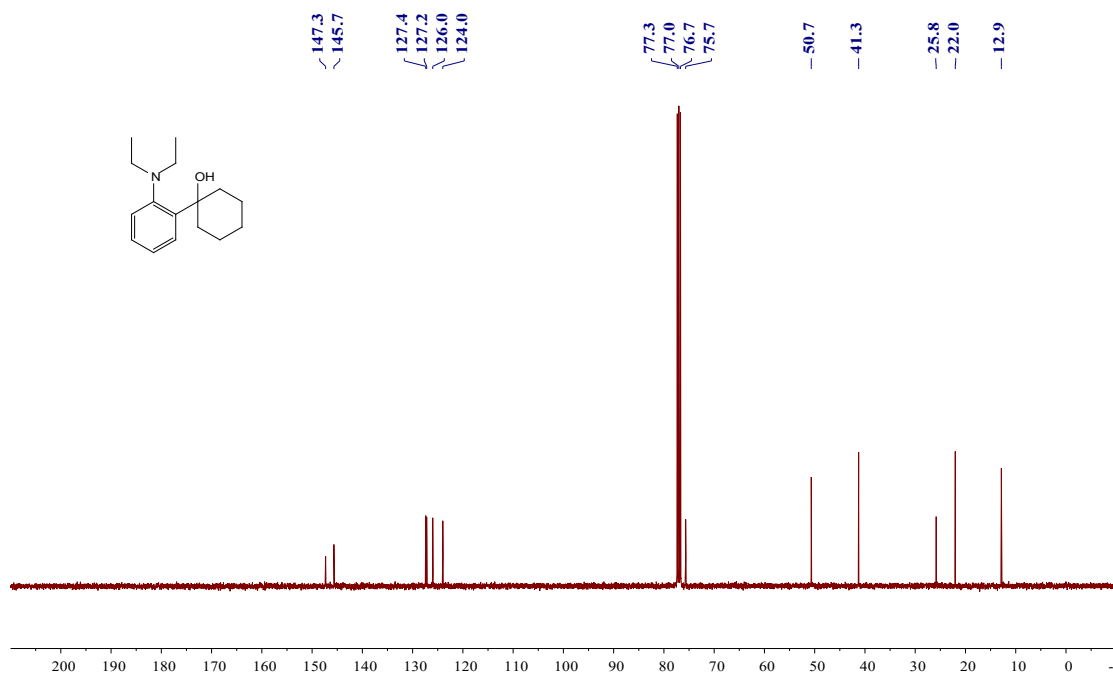

<sup>1</sup>H and <sup>13</sup>C NMR spectra of compound 3a0

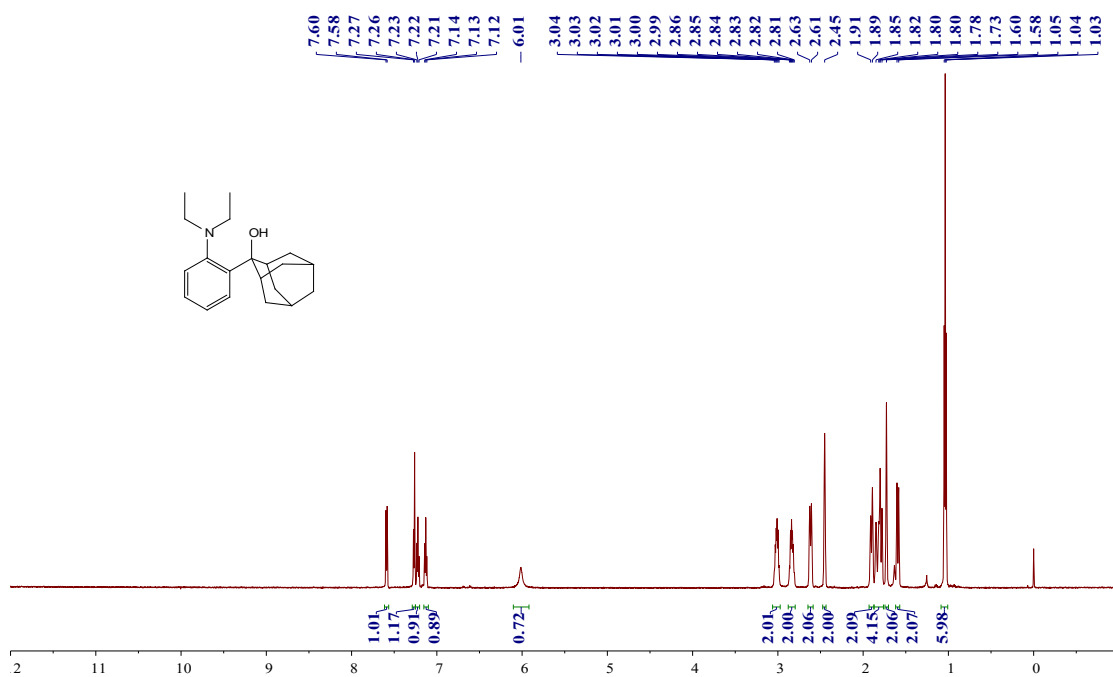

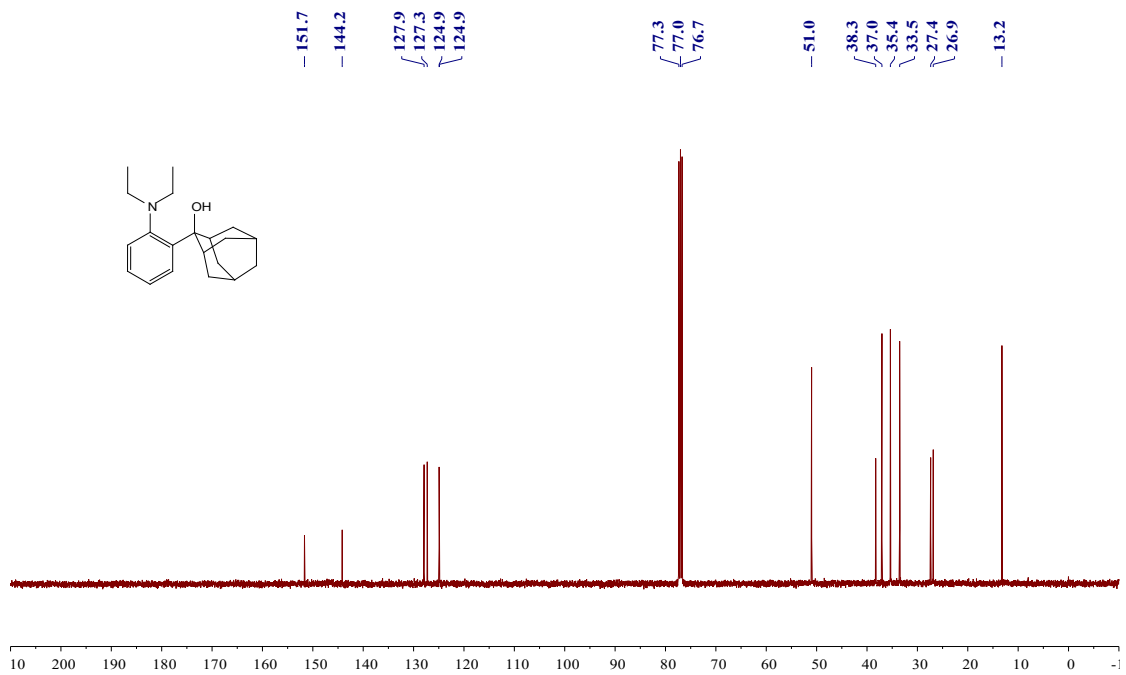

**<sup>1</sup>H and <sup>13</sup>C NMR spectra of compound 3ap**

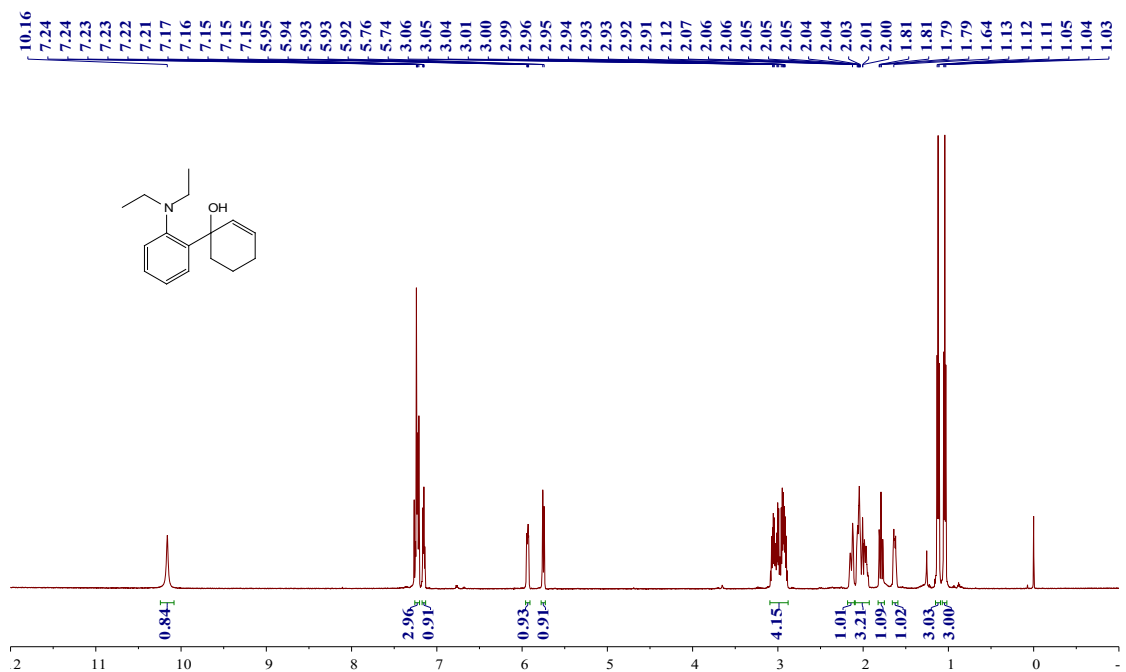

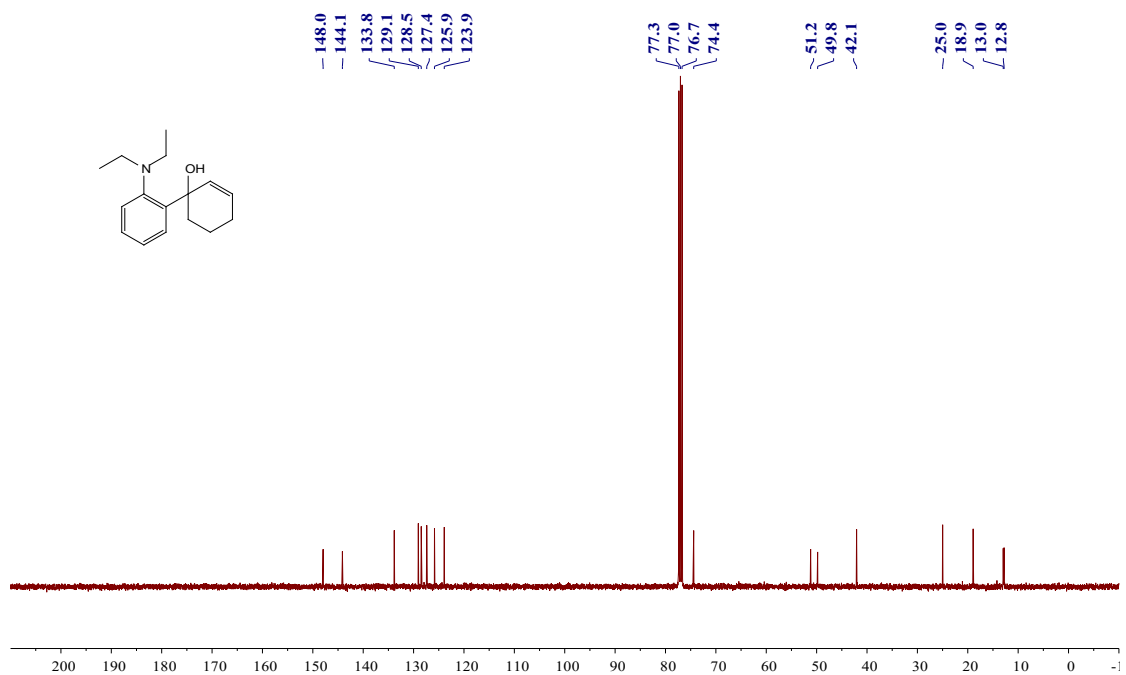

<sup>1</sup>H and <sup>13</sup>C NMR spectra of compound 3aq

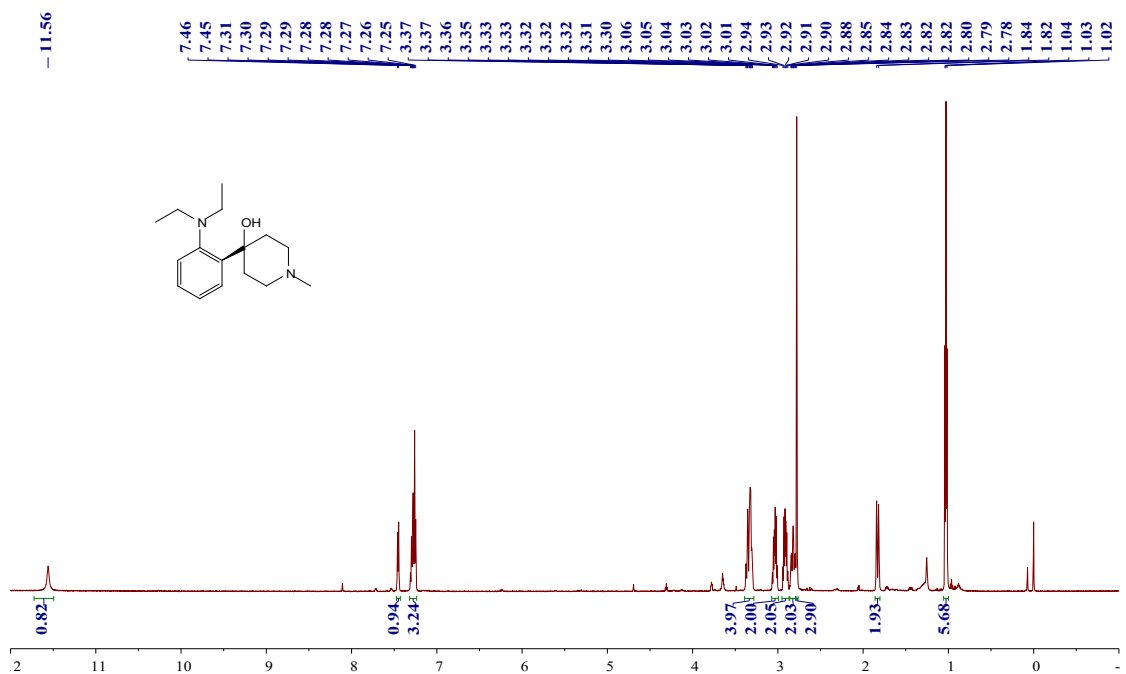

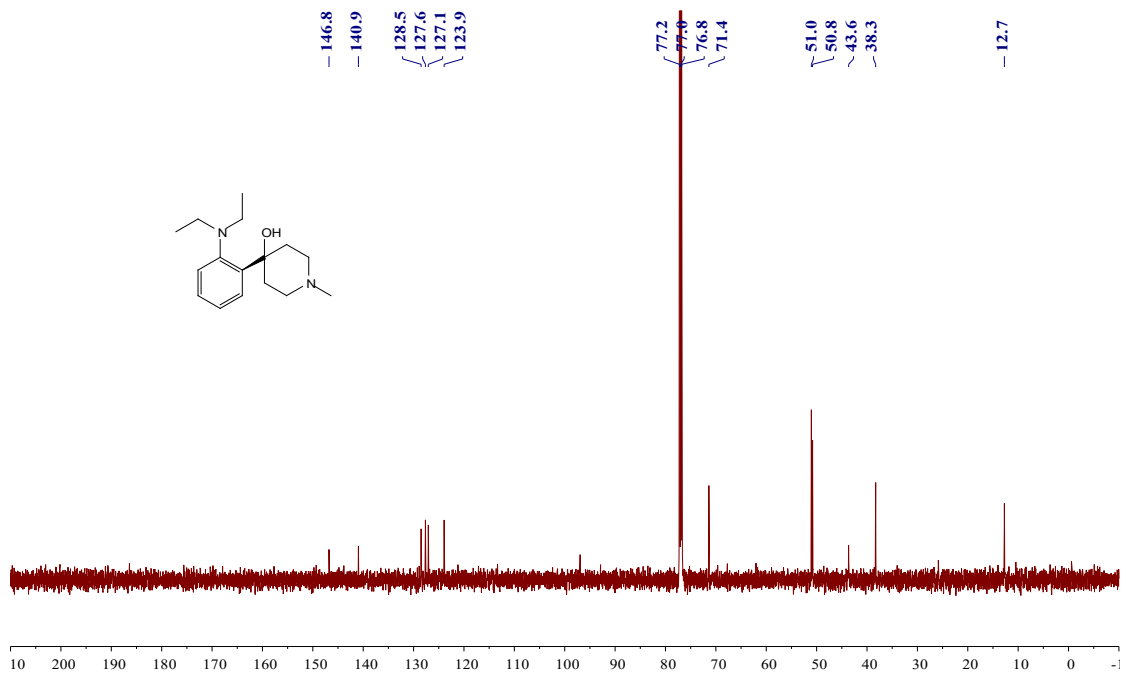

<sup>1</sup>H and <sup>13</sup>C NMR spectra of compound **3ar**

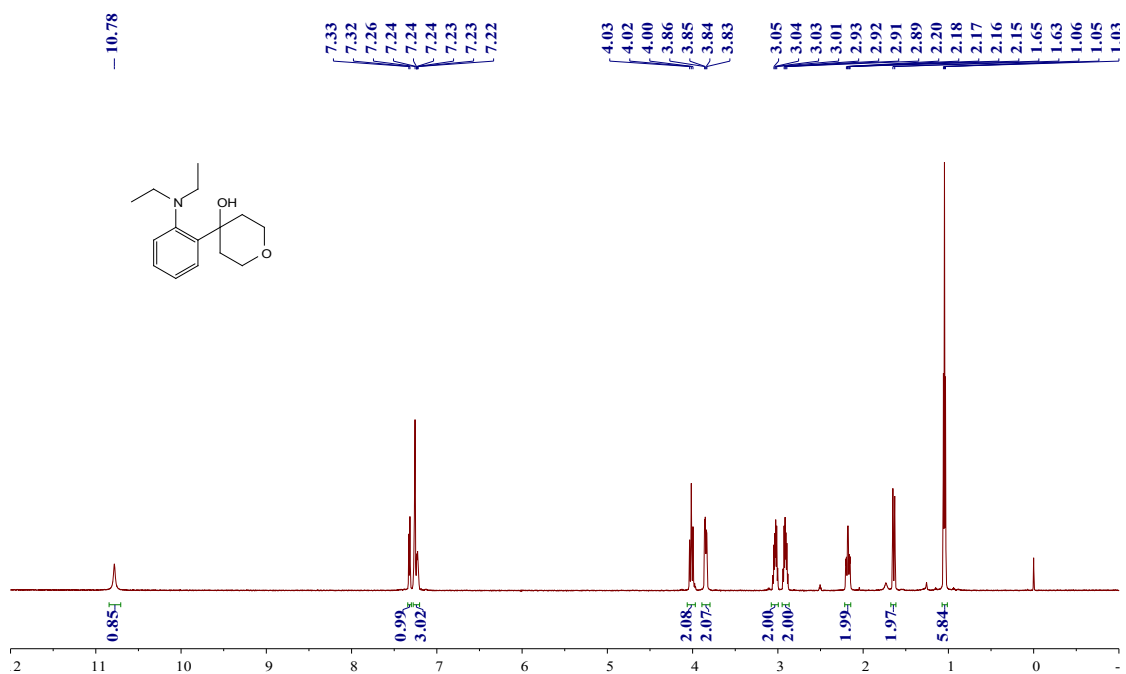

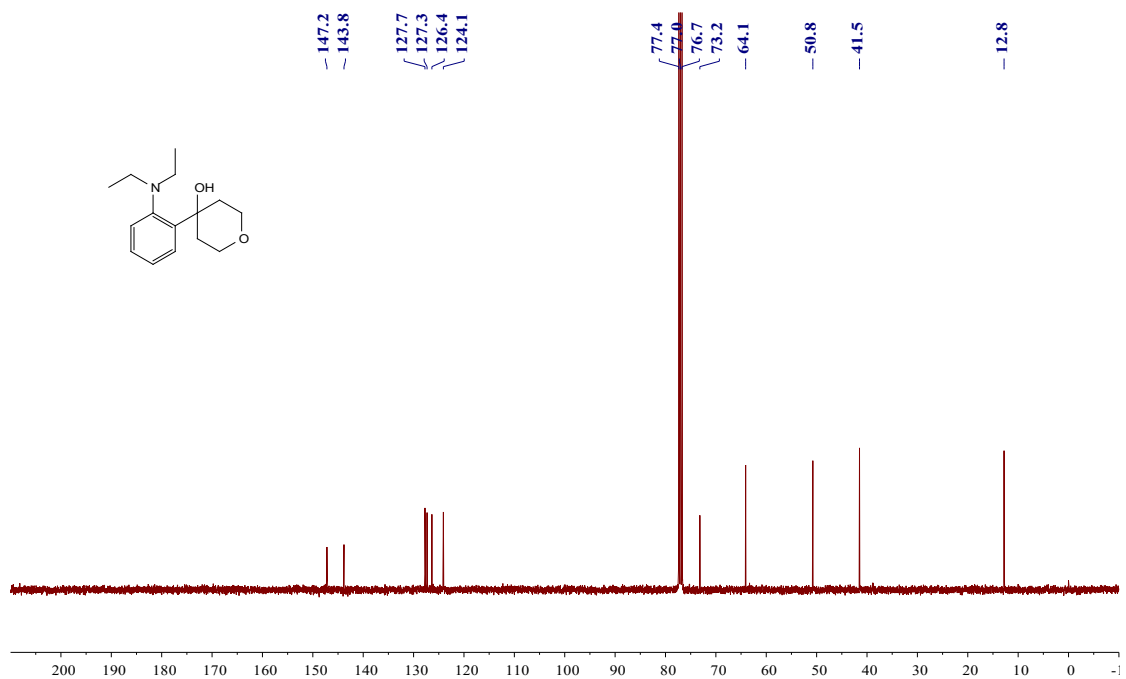

<sup>1</sup>H and <sup>13</sup>C NMR spectra of compound 3as

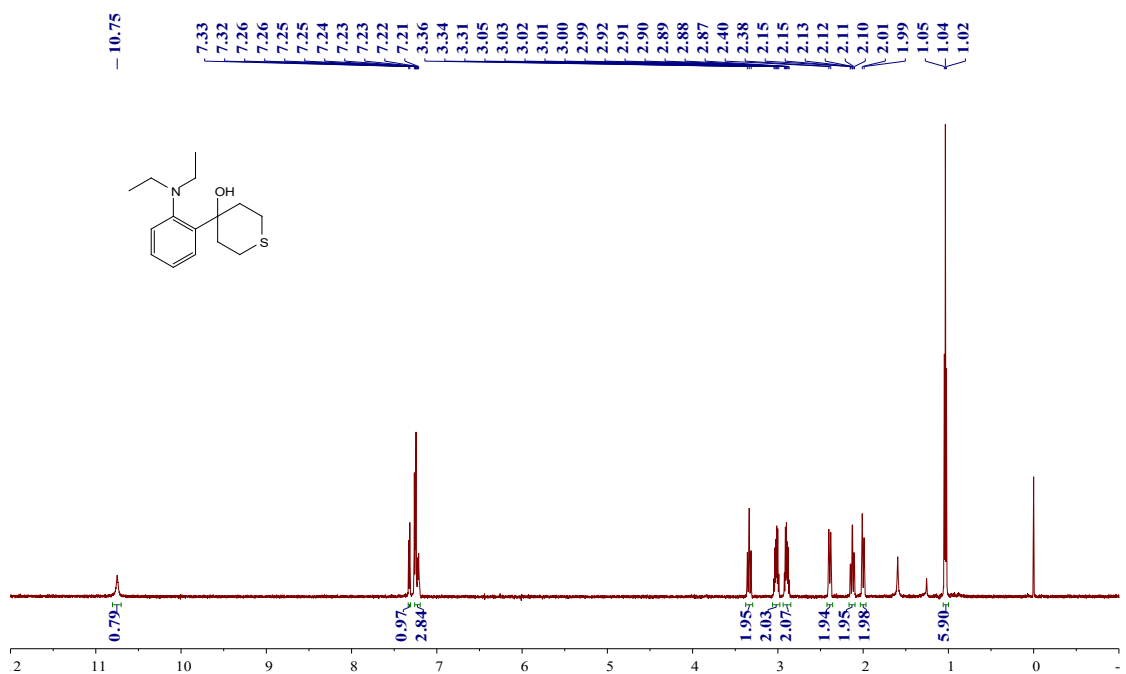

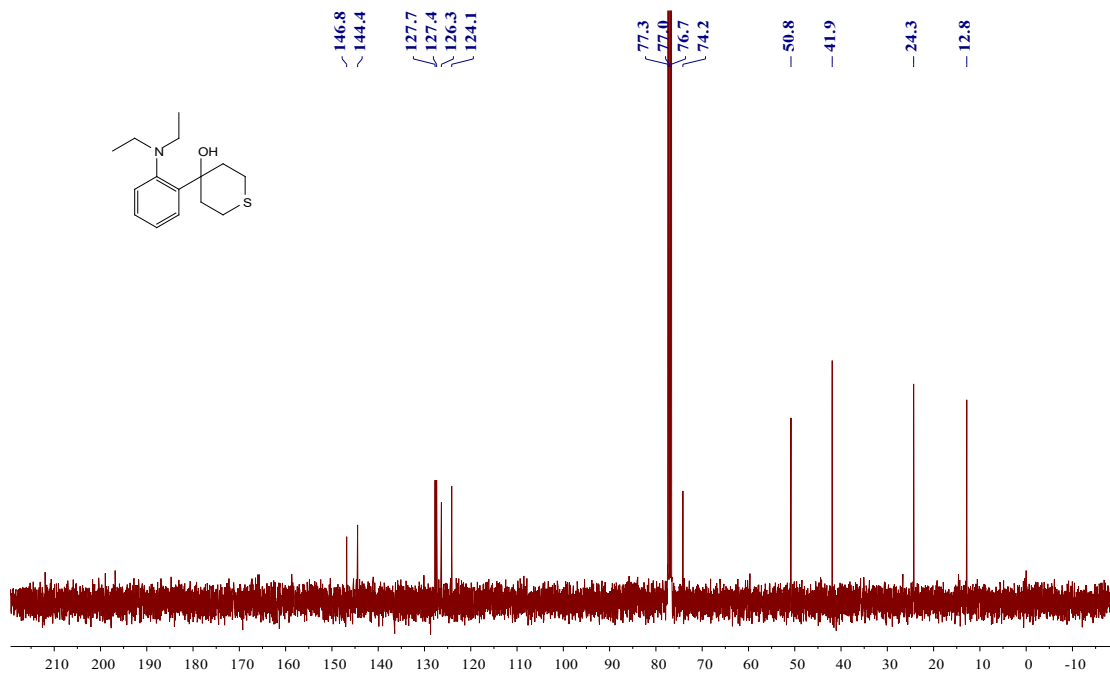

<sup>1</sup>H and <sup>13</sup>C NMR spectra of compound 3at

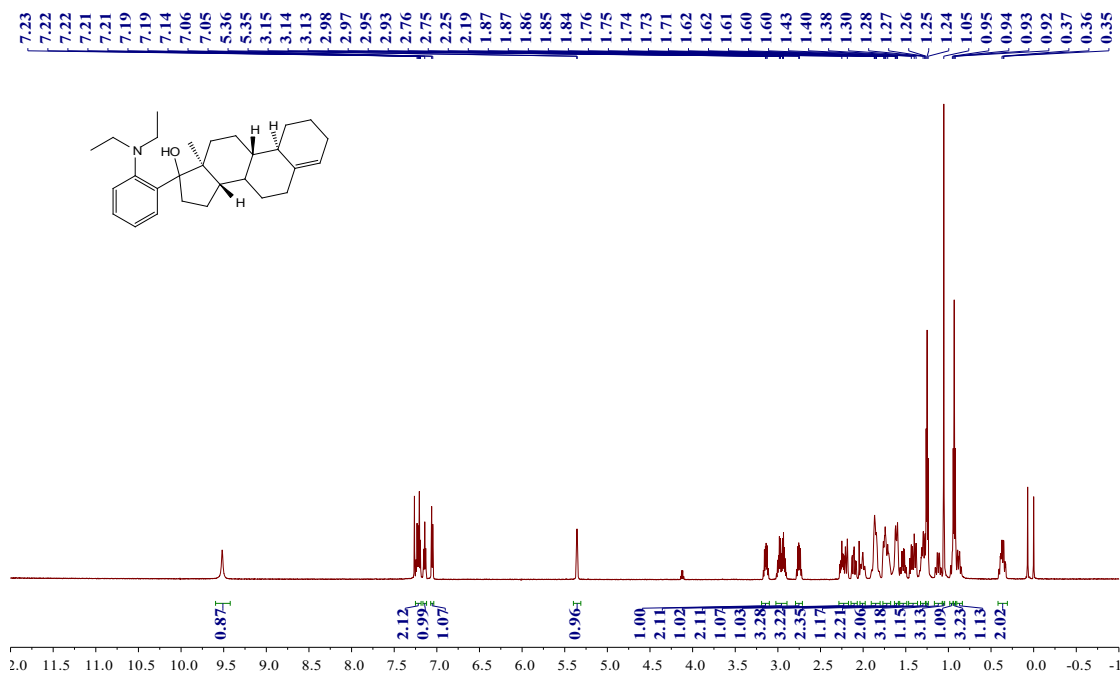

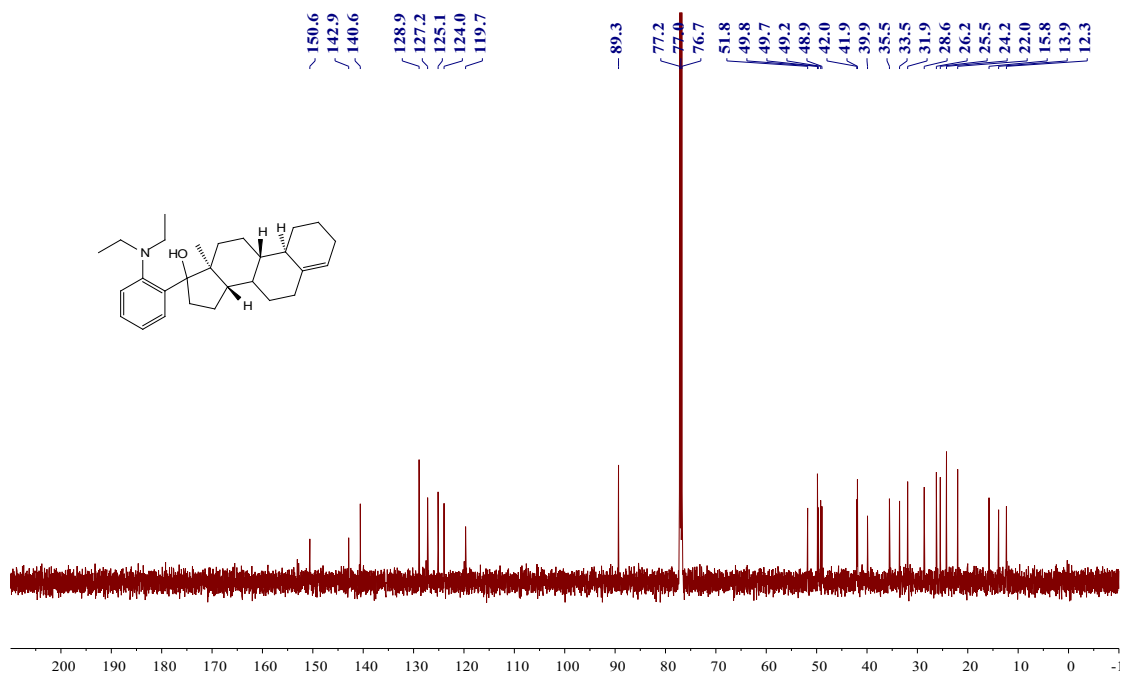

<sup>1</sup>H and <sup>13</sup>C NMR spectra of compound 3au

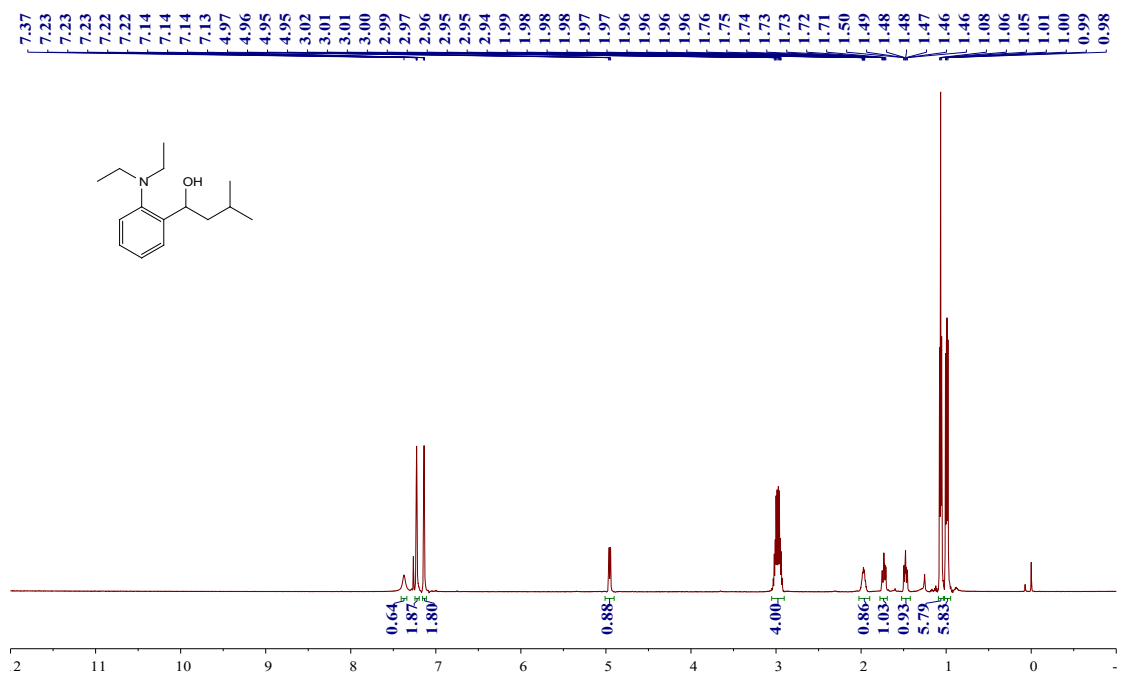

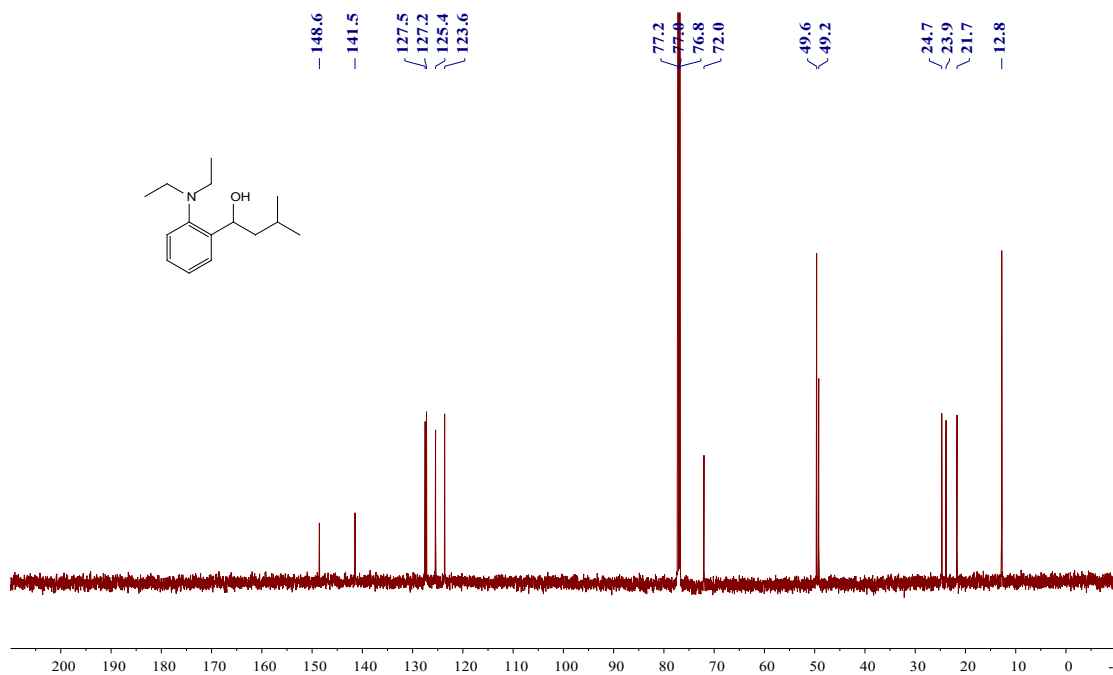

$^1\text{H}$  and  $^{13}\text{C}$  NMR spectra of compound 3av

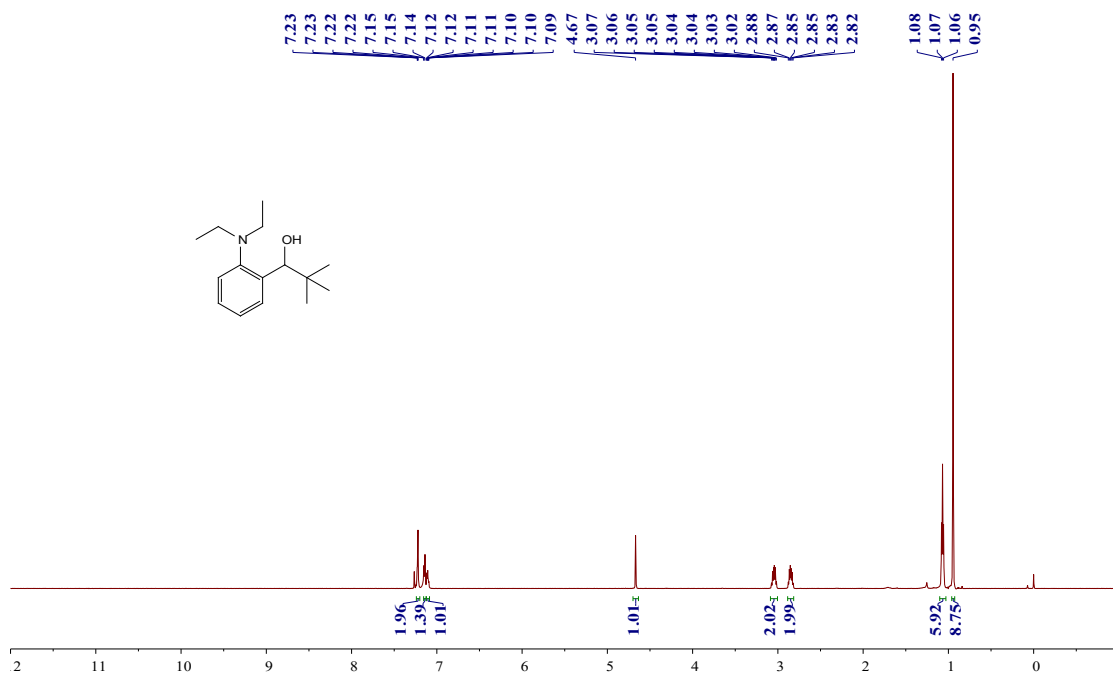



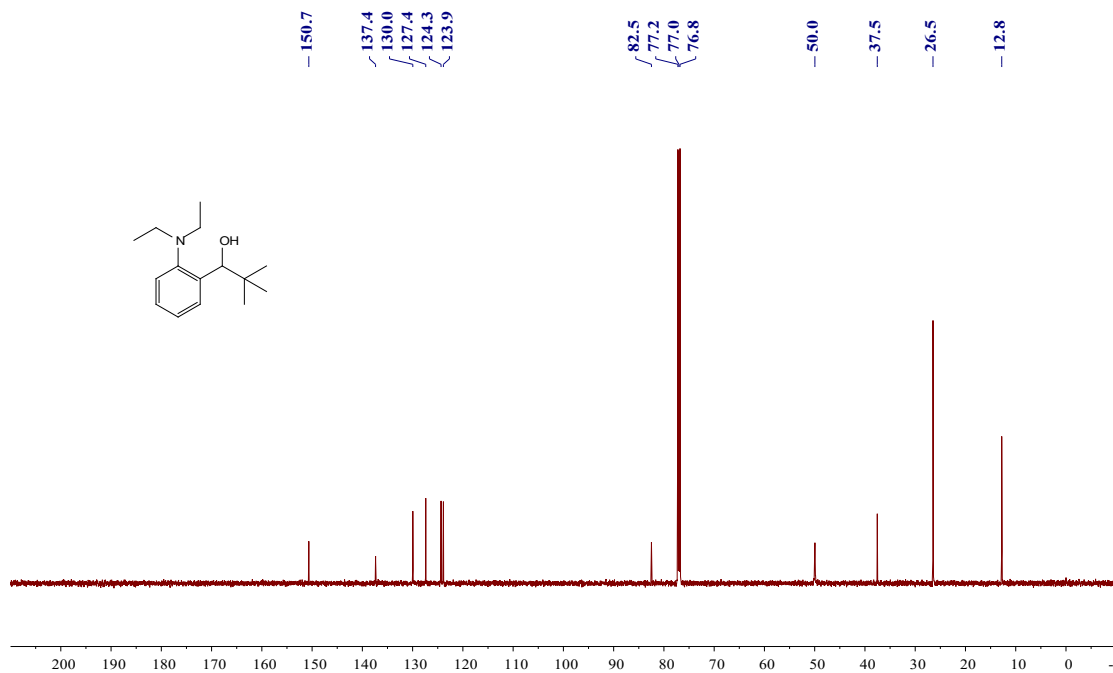

<sup>1</sup>H and <sup>13</sup>C NMR spectra of compound **3aw**

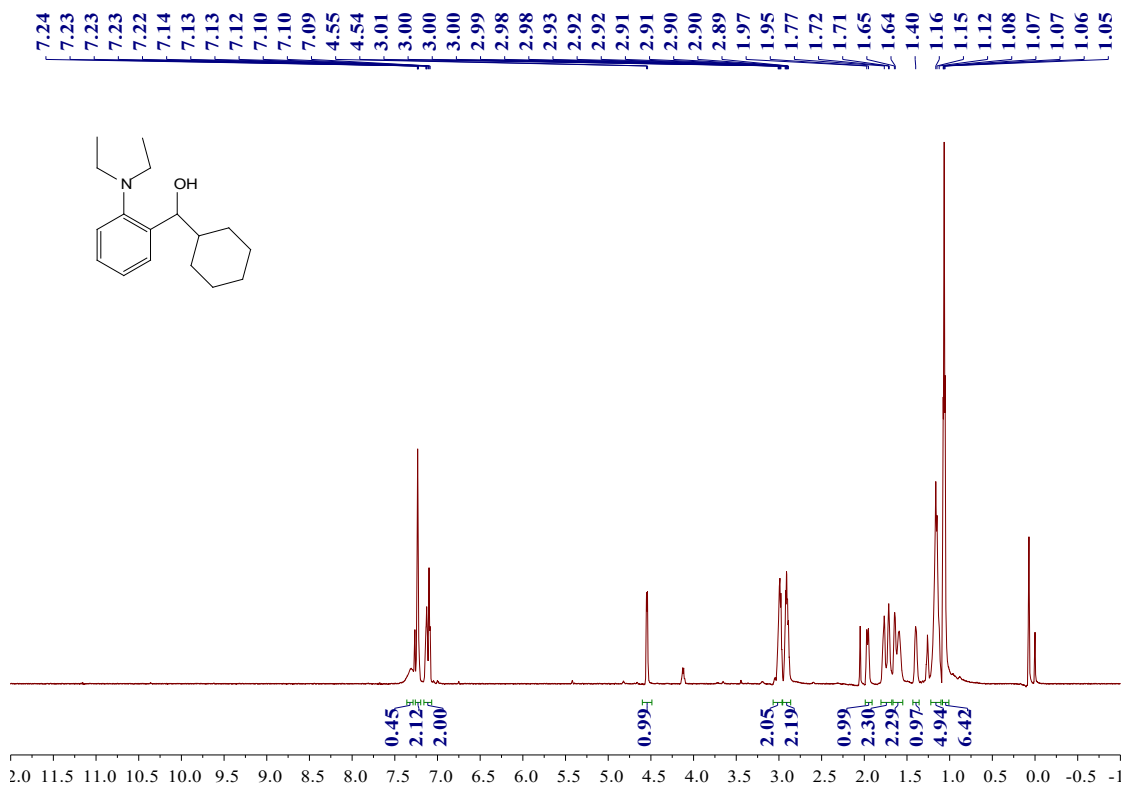

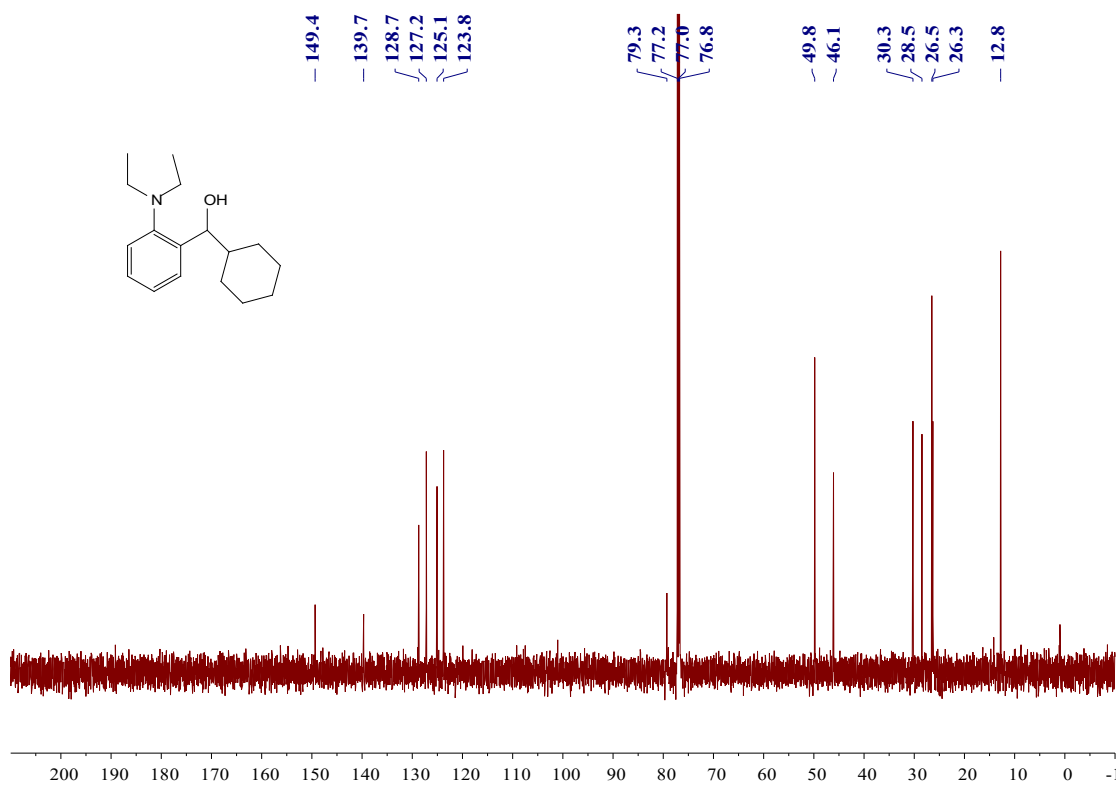

<sup>1</sup>H and <sup>13</sup>C NMR spectra of compound **3ax**

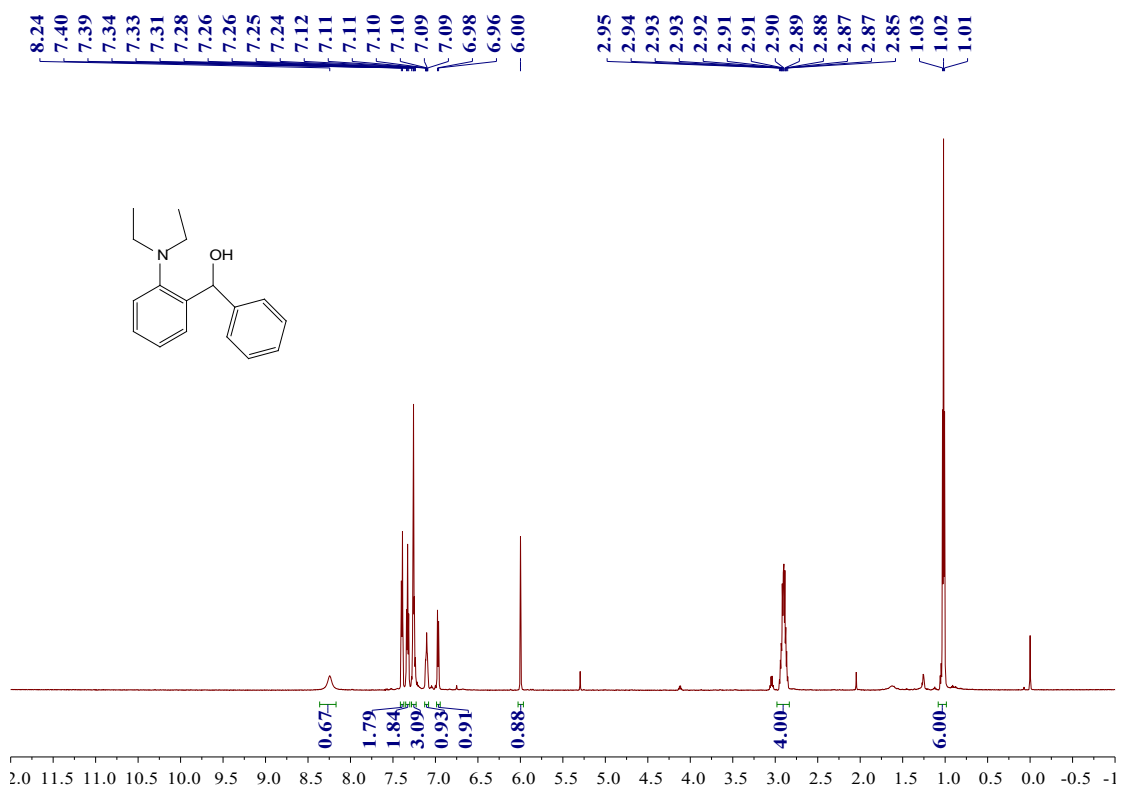

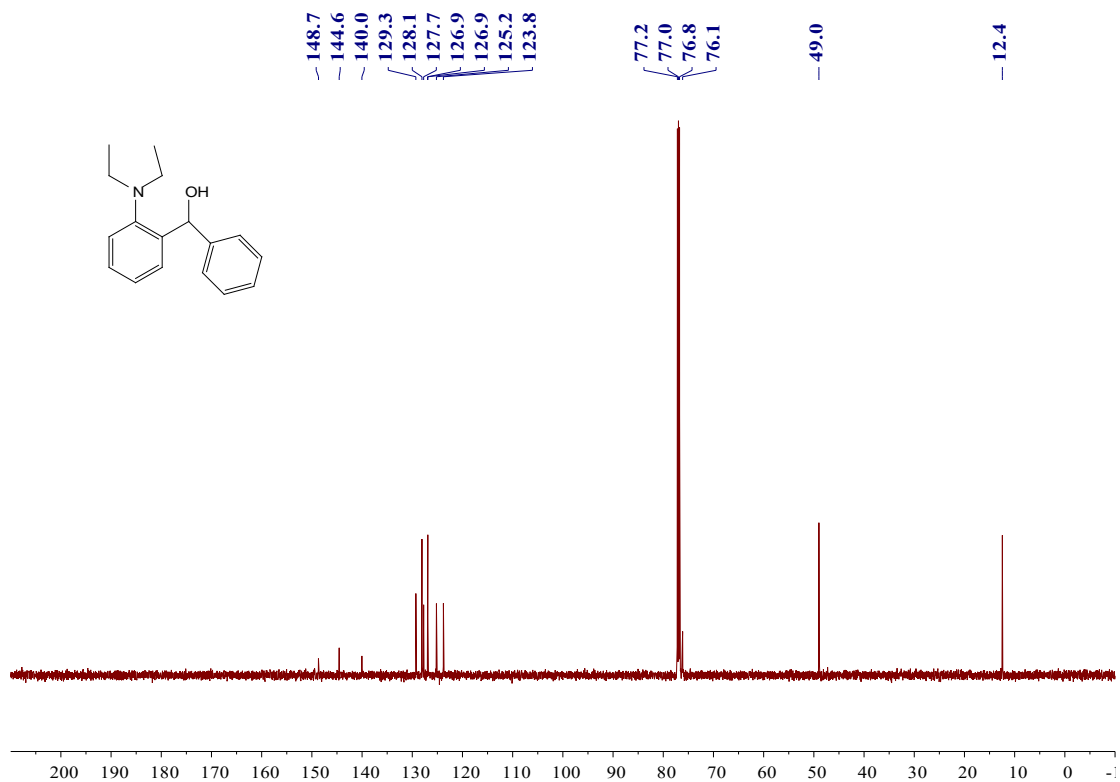

<sup>1</sup>H and <sup>13</sup>C NMR spectra of compound **3ay**

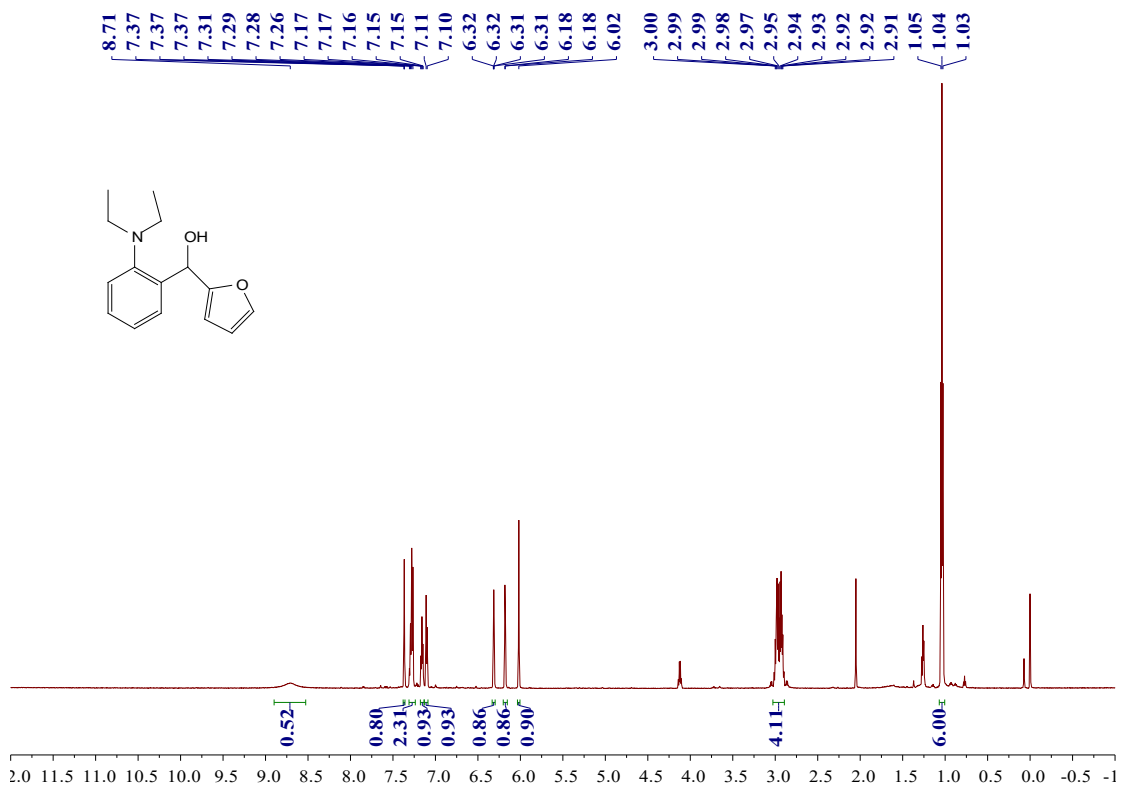

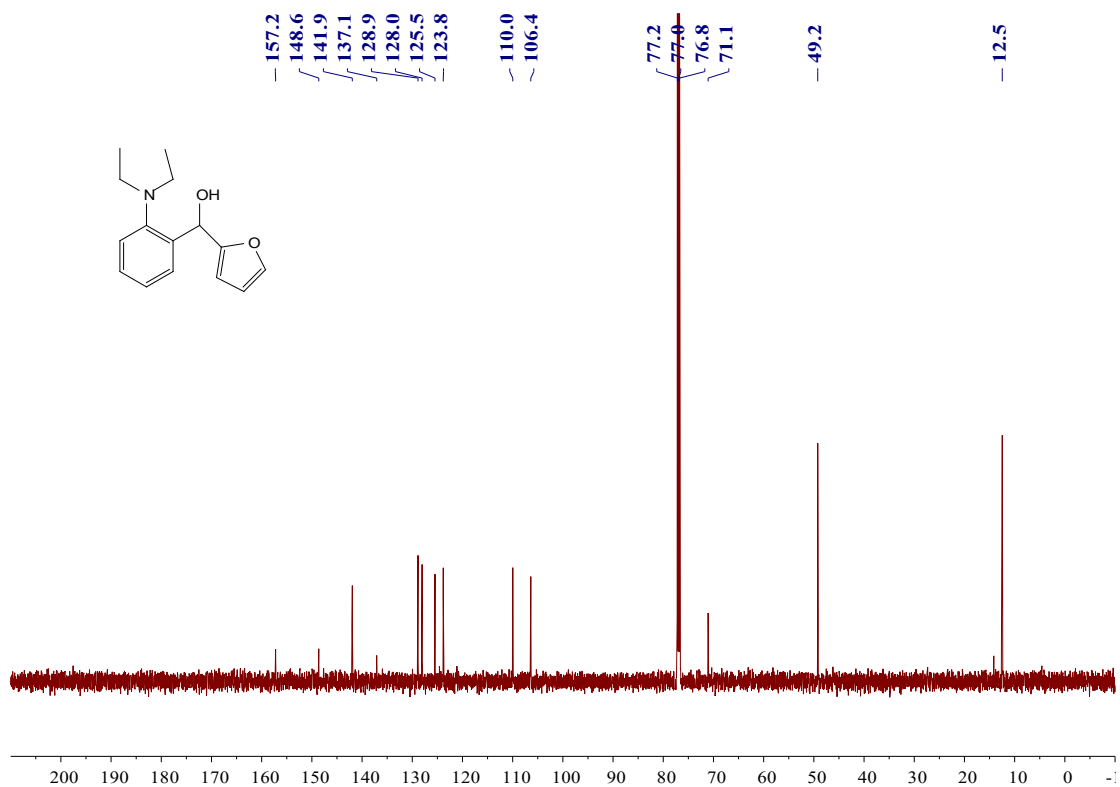

$^1\text{H}$  and  $^{13}\text{C}$  NMR spectra of compound bis(2-(diethylamino)phenyl)methanol (8)

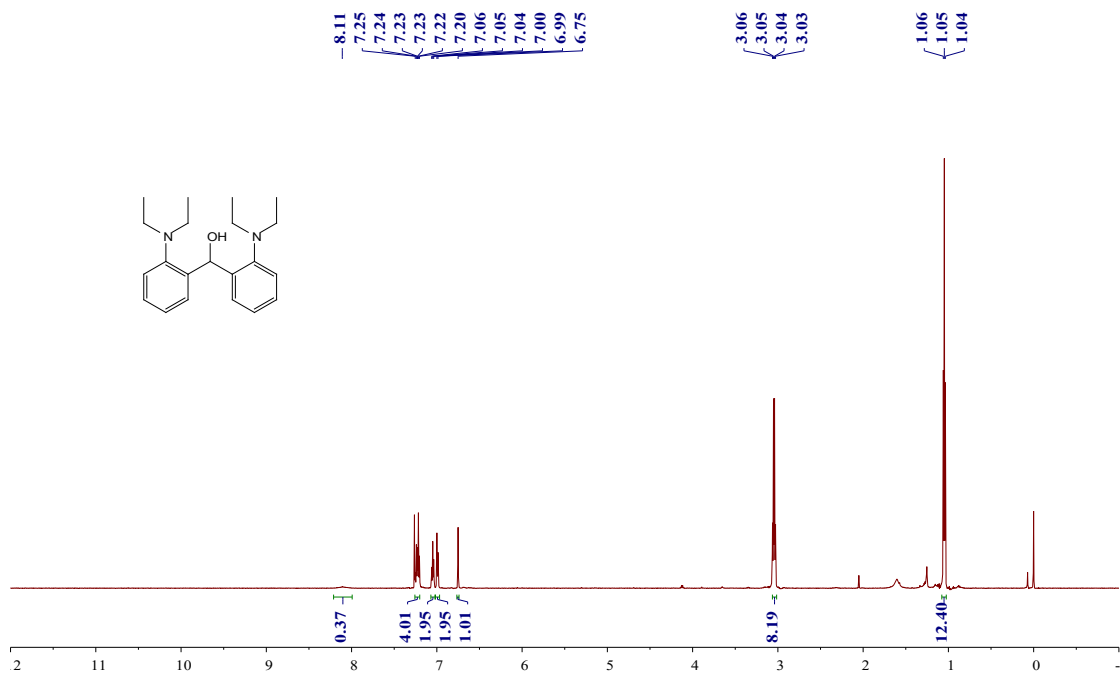

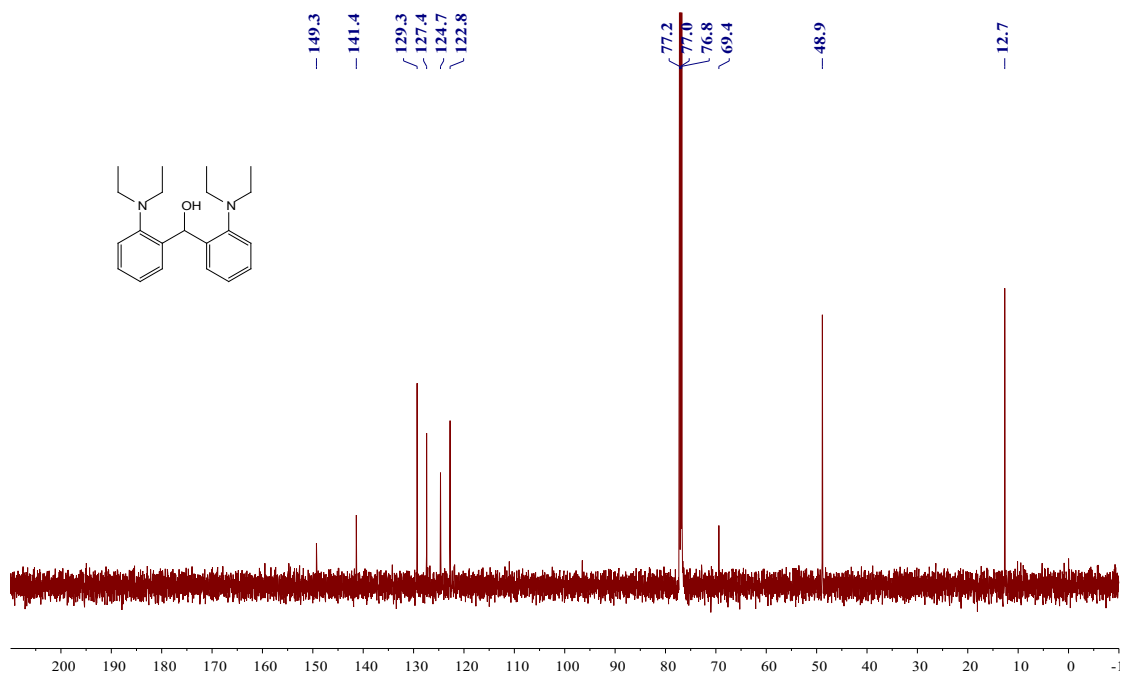

<sup>1</sup>H and <sup>13</sup>C NMR spectra of compound 3b'a

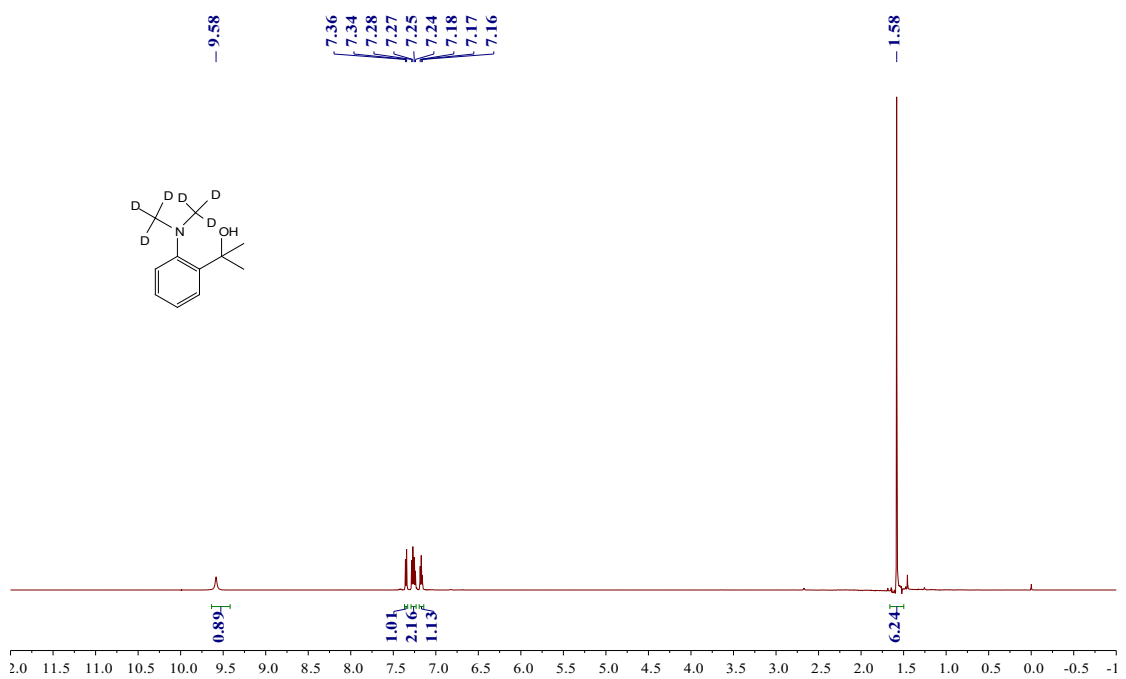

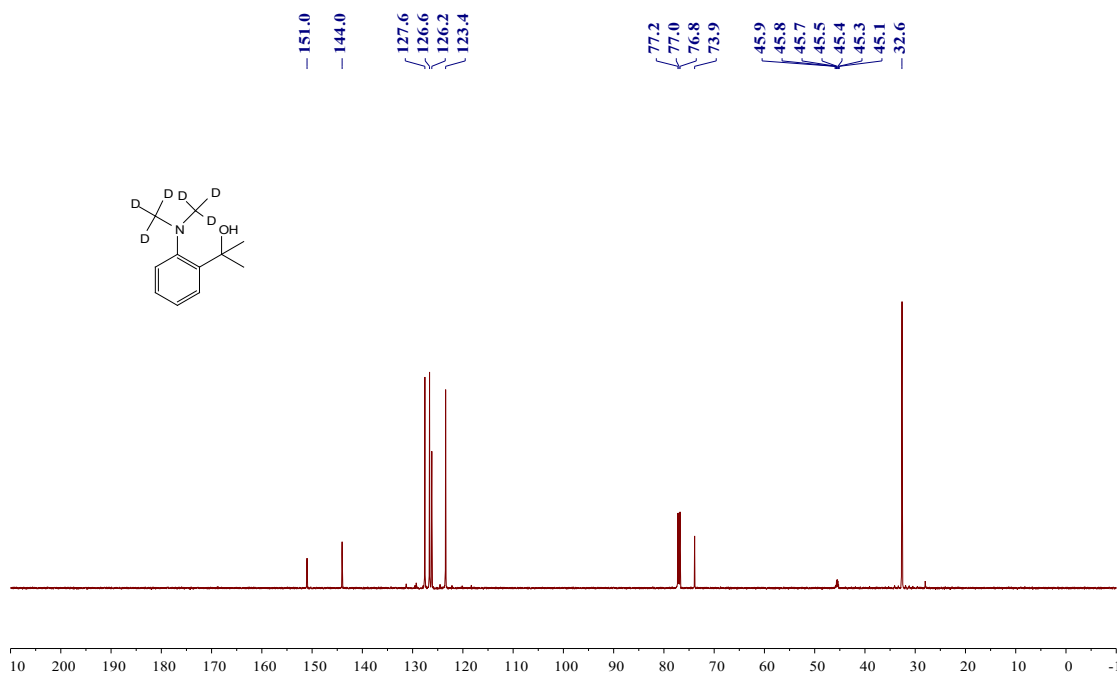

$^1\text{H}$  and  $^{13}\text{C}$  NMR spectra of compound 5

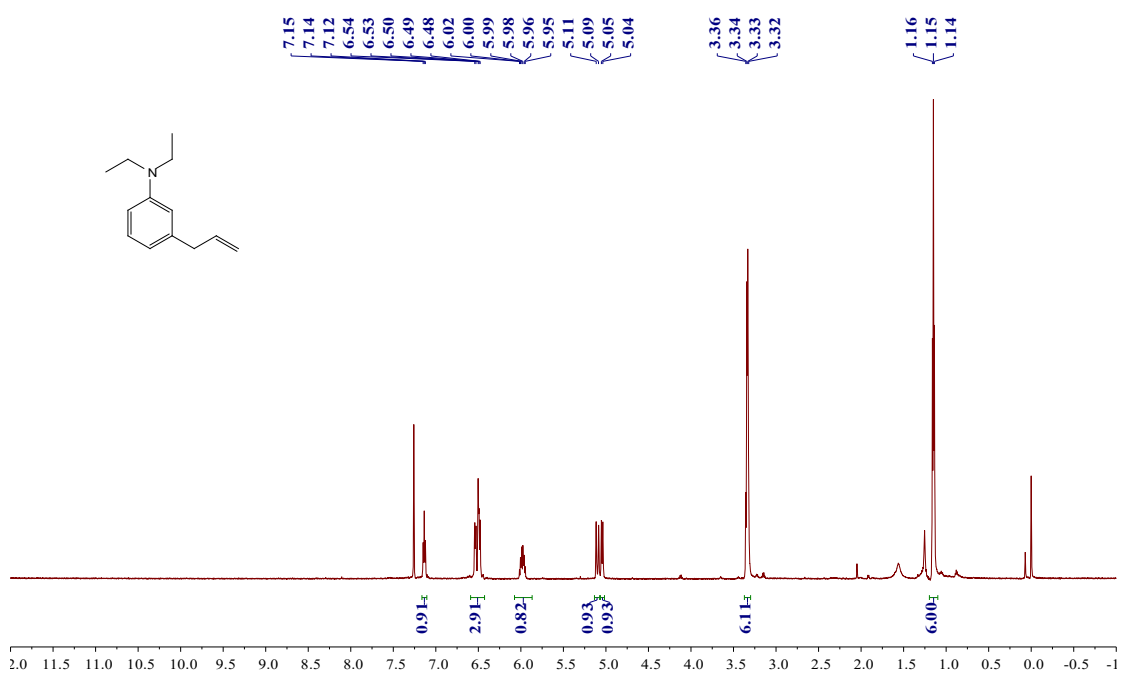

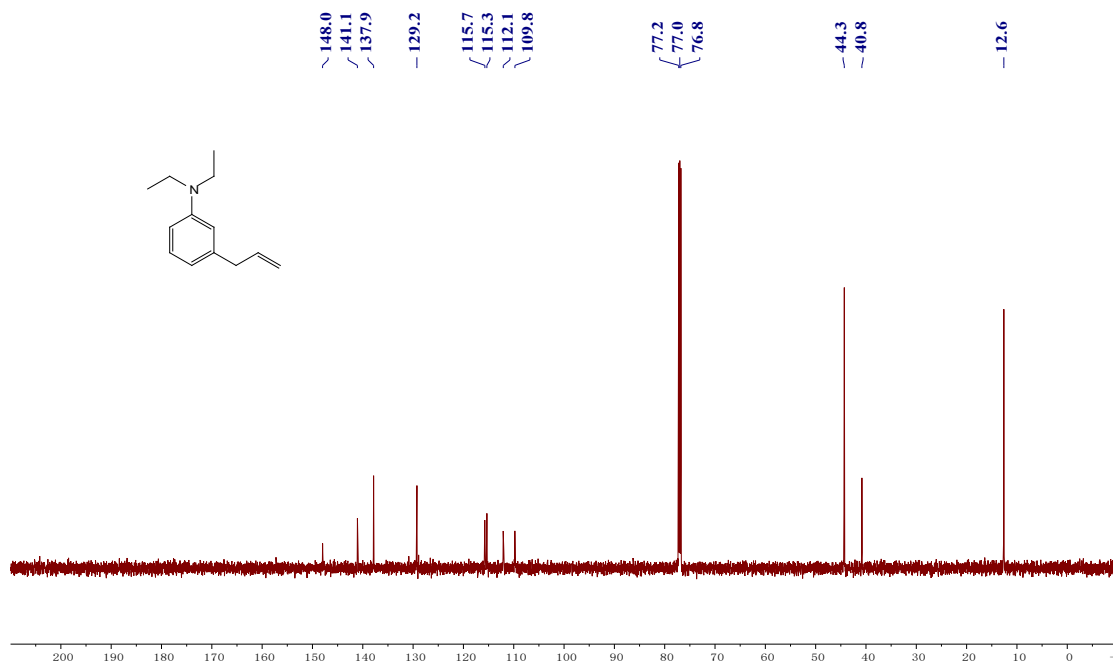

<sup>1</sup>H and <sup>13</sup>C NMR spectra of compound 4a'

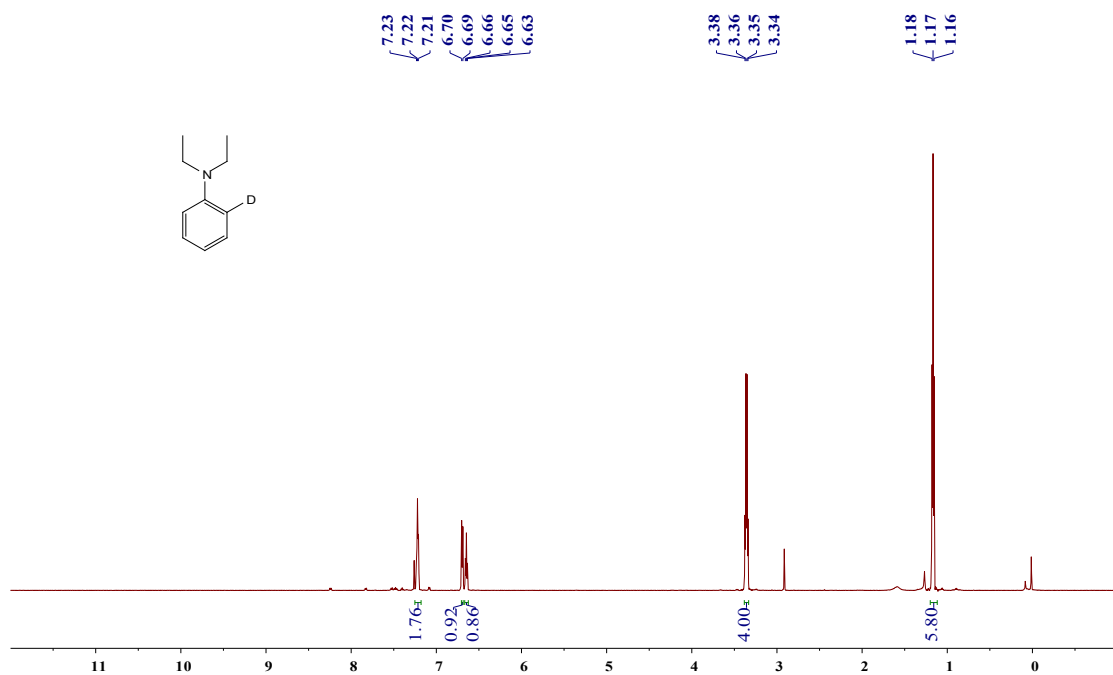

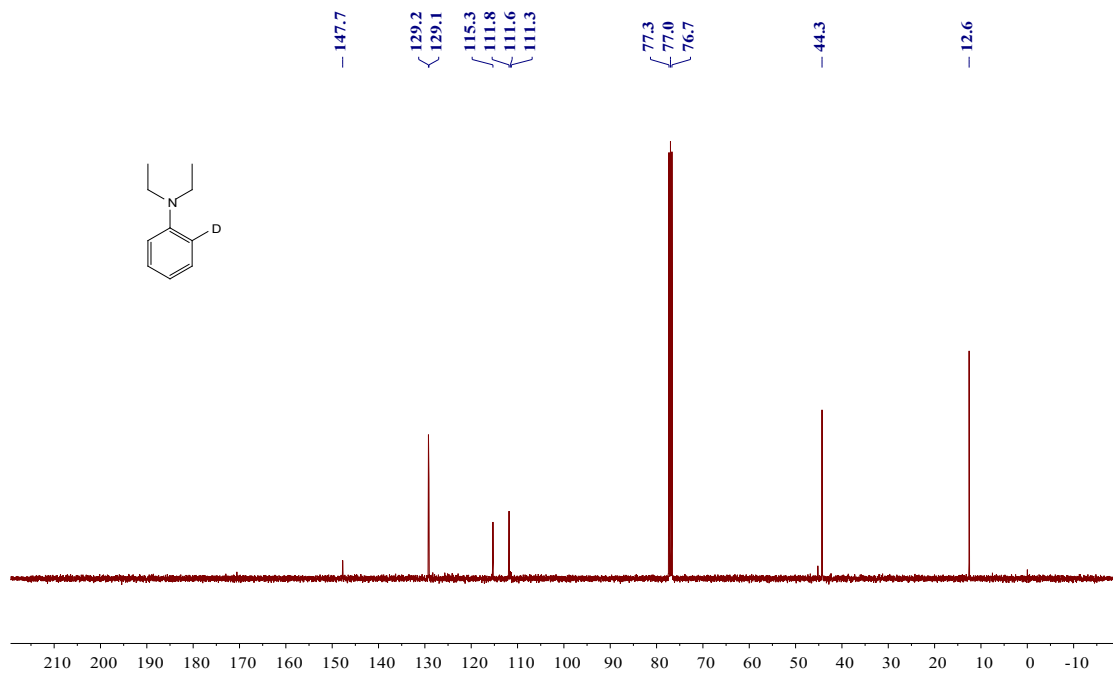

Supplement: d1sc06278f1.pdf [file d1sc06278f1.pdf]
